# Supplementary material for: Transcriptomics of Desiccation Tolerance in the Streptophyte Green Alga Klebsormidium Reveal a Land Plant-Like Defense Reaction
Source: PLoS One. 2014 Oct 23;9(10):e110630. doi: 10.1371/journal.pone.0110630 (PMC4207709; doi:10.1371/journal.pone.0110630)
Supplement: Table S1 — Module reconstruction. KO identifiers were retrieved from the KEGG orthology database for the complete, up-regulated and down-regulated dataset used to reconstruct KEGG modules. Column A, B and C show the results for the complete (all), the up-regulated and the down-regulated data set, respectively. Column D displays the KO identifier and column E the name of the pathway or enzyme. (XLSX) [file pone.0110630.s003.xlsx]

## Sheet: Module Reconstruction Result - 
All	Up-regulated	Down-regulated
Module Reconstruction Result	Module Reconstruction Result	Module Reconstruction Result
Pathway module	Pathway module	Pathway module
Energy metabolism	Energy metabolism	Energy metabolism
Carbon fixation	Carbon fixation	Carbon fixation
M00165 Reductive pentose phosphate cycle (Calvin cycle) [PATH:map01200 map00710] (46) (complete)	M00165 Reductive pentose phosphate cycle (Calvin cycle) [PATH:map01200 map00710] (19) (2 blocks missing)	M00165 Reductive pentose phosphate cycle (Calvin cycle) [PATH:map01200 map00710] (2) (incomplete)	M00165	Reductive pentose phosphate cycle (Calvin cycle) [PATH:map01200 map00710]
K00855 UN018866,UN034540,UN039435	K00855 UN018866	K00855	K00855	PRK, prkB; phosphoribulokinase [EC:2.7.1.19]
K01601 UN044161	K01601 UN044161	K01601	K01601	rbcL; ribulose-bisphosphate carboxylase large chain [EC:4.1.1.39]
K01602 UN020129,UN033190,UN039423	K01602 UN039423,UN020129	K01602	K01602	rbcS; ribulose-bisphosphate carboxylase small chain [EC:4.1.1.39]
K00927 UN021124,UN035149,UN038310,UN038382,UN039087	K00927 UN038382	K00927	K00927	PGK, pgk; phosphoglycerate kinase [EC:2.7.2.3]
K05298	K05298	K05298	K05298	GAPA; glyceraldehyde-3-phosphate dehydrogenase (NADP+) (phosphorylating) [EC:1.2.1.13]
K00150	K00150	K00150	K00150	gap2; glyceraldehyde-3-phosphate dehydrogenase (NAD(P)) [EC:1.2.1.59]
K00134 UN022225,UN022397,UN024817,UN033789,UN035181,UN037394,UN039621	K00134 UN033789,UN024817,UN022397,UN035181,UN037394	K00134	K00134	GAPDH, gapA; glyceraldehyde 3-phosphate dehydrogenase [EC:1.2.1.12]
K01623 UN018807,UN032504,UN033232,UN036116,UN039509,UN041543	K01623 UN018807,UN032504	K01623 UN041543	K01623	ALDO; fructose-bisphosphate aldolase, class I [EC:4.1.2.13]
K01624	K01624	K01624	K01624	FBA, fbaA; fructose-bisphosphate aldolase, class II [EC:4.1.2.13]
K03841 UN035947,UN038332,UN039612	K03841	K03841	K03841	FBP, fbp; fructose-1,6-bisphosphatase I [EC:3.1.3.11]
K02446	K02446	K02446	K02446	glpX; fructose-1,6-bisphosphatase II [EC:3.1.3.11]
K11532	K11532	K11532	K11532	glpX-SEBP; fructose-1,6-bisphosphatase II / sedoheptulose-1,7-bisphosphatase [EC:3.1.3.11 3.1.3.37]
K04041	K04041	K04041	K04041	fbp3; fructose-1,6-bisphosphatase III [EC:3.1.3.11]
K00615 UN020466,UN032434,UN039590	K00615 UN020466,UN032434	K00615	K00615	E2.2.1.1, tktA, tktB; transketolase [EC:2.2.1.1]
K01623 UN018807,UN032504,UN033232,UN036116,UN039509,UN041543	K01623 UN018807,UN032504	K01623 UN041543
K01624	K01624	K01624
K01100 UN023788,UN034945	K01100	K01100	K01100	E3.1.3.37; sedoheptulose-bisphosphatase [EC:3.1.3.37]
K11532	K11532	K11532
K00615 UN020466,UN032434,UN039590	K00615 UN020466,UN032434	K00615
K01807 UN001156,UN020973,UN034928,UN038648	K01807 UN020973	K01807	K01807	rpiA; ribose 5-phosphate isomerase A [EC:5.3.1.6]
K01808	K01808	K01808	K01808	rpiB; ribose 5-phosphate isomerase B [EC:5.3.1.6]
M00579 Phosphate acetyltransferase-acetate kinase pathway, acetyl-CoA => acetate [PATH:map01200 map00720] (3) (complete)			M00579	Phosphate acetyltransferase-acetate kinase pathway, acetyl-CoA => acetate [PATH:map01200 map00720]
K00625			K00625	E2.3.1.8, pta; phosphate acetyltransferase [EC:2.3.1.8]
K13788 UN036000			K13788	pta; phosphate acetyltransferase [EC:2.3.1.8]
K15024			K15024	K15024; putative phosphotransacetylase [EC:2.3.1.8]
K00925 UN011023,UN027459			K00925	ackA; acetate kinase [EC:2.7.2.1]
Nitrogen metabolism	Nitrogen metabolism	Nitrogen metabolism
M00531 Assimilatory nitrate reduction, nitrate => ammonia [PATH:map00910] (7) (complete)		M00531 Assimilatory nitrate reduction, nitrate => ammonia [PATH:map00910] (6) (complete)	M00531	Assimilatory nitrate reduction, nitrate => ammonia [PATH:map00910]
K00367		K00367	K00367	narB; ferredoxin-nitrate reductase [EC:1.7.7.2]
K10534 UN020572,UN043898		K10534 UN020572,UN043898	K10534	NR; nitrate reductase (NAD(P)H) [EC:1.7.1.1 1.7.1.2 1.7.1.3]
K00372		K00372	K00372	nasA; assimilatory nitrate reductase catalytic subunit [EC:1.7.99.4]
K00360		K00360	K00360	nasB; assimilatory nitrate reductase electron transfer subunit [EC:1.7.99.4]
K00366 UN000860,UN021473,UN030818,UN034577,UN039574		K00366 UN030818,UN021473,UN034577,UN039574	K00366	nirA; ferredoxin-nitrite reductase [EC:1.7.7.1]
Sulfur metabolism	Sulfur metabolism	Sulfur metabolism	Sulfur	metabolism
M00176 Assimilatory sulfate reduction, sulfate => H2S [PATH:map00920] (9) (complete)		M00176 Assimilatory sulfate reduction, sulfate => H2S [PATH:map00920] (2) (2 blocks missing)	M00176	Assimilatory sulfate reduction, sulfate => H2S [PATH:map00920]
K13811 UN034958		K13811	K13811	PAPSS; 3'-phosphoadenosine 5'-phosphosulfate synthase [EC:2.7.7.4 2.7.1.25]
K00958		K00958	K00958	sat, met3; sulfate adenylyltransferase [EC:2.7.7.4]
K00860 UN023851		K00860	K00860	cysC; adenylylsulfate kinase [EC:2.7.1.25]
K00955		K00955	K00955	cysNC; bifunctional enzyme CysN/CysC [EC:2.7.7.4 2.7.1.25]
K00957		K00957	K00957	cysD; sulfate adenylyltransferase subunit 2 [EC:2.7.7.4]
K00956		K00956	K00956	cysN; sulfate adenylyltransferase subunit 1 [EC:2.7.7.4]
K00957		K00957
K00860 UN023851		K00860
K00390 UN038136		K00390	K00390	cysH; phosphoadenosine phosphosulfate reductase [EC:1.8.4.8]
K00380		K00380	K00380	cysJ; sulfite reductase (NADPH) flavoprotein alpha-component [EC:1.8.1.2]
K00381		K00381	K00381	cysI; sulfite reductase (NADPH) hemoprotein beta-component [EC:1.8.1.2]
K00392 UN019788,UN022439,UN026554,UN036230,UN051975		K00392 UN026554,UN022439	K00392	sir; sulfite reductase (ferredoxin) [EC:1.8.7.1]
Carbohydrate and lipid metabolism	Carbohydrate and lipid metabolism	Carbohydrate and lipid metabolism
Central carbohydrate metabolism	Central carbohydrate metabolism	Central carbohydrate metabolism
M00001 Glycolysis (Embden-Meyerhof pathway), glucose => pyruvate [PATH:map01200 map00010] (51) (complete)	M00001 Glycolysis (Embden-Meyerhof pathway), glucose => pyruvate [PATH:map01200 map00010] (12) (incomplete)	M00001 Glycolysis (Embden-Meyerhof pathway), glucose => pyruvate [PATH:map01200 map00010] (4) (incomplete)	M00001	Glycolysis (Embden-Meyerhof pathway), glucose => pyruvate [PATH:map01200 map00010]
K00844 UN030869,UN033094	K00844 UN033094,UN030869	K00844	K00844	HK; hexokinase [EC:2.7.1.1]
K12407	K12407	K12407	K12407	GCK; glucokinase [EC:2.7.1.2]
K00845	K00845	K00845	K00845	glk; glucokinase [EC:2.7.1.2]
K00886 UN021432,UN035423,UN038405	K00886	K00886	K00886	ppgK; polyphosphate glucokinase [EC:2.7.1.63]
K08074	K08074	K08074	K08074	ADPGK; ADP-dependent glucokinase [EC:2.7.1.147]
K00918	K00918	K00918	K00918	pfkC; ADP-dependent phosphofructokinase/glucokinase [EC:2.7.1.146 2.7.1.147]
K01810 UN029635	K01810	K01810	K01810	GPI, pgi; glucose-6-phosphate isomerase [EC:5.3.1.9]
K06859	K06859	K06859	K06859	pgi1; glucose-6-phosphate isomerase, archaeal [EC:5.3.1.9]
K13810	K13810	K13810	K13810	tal-pgi; transaldolase / glucose-6-phosphate isomerase [EC:2.2.1.2 5.3.1.9]
K15916	K15916	K15916	K15916	pgi-pmi; glucose/mannose-6-phosphate isomerase [EC:5.3.1.9 5.3.1.8]
K00850 UN005330,UN021850,UN028439	K00850	K00850	K00850	pfkA, PFK; 6-phosphofructokinase 1 [EC:2.7.1.11]
K16370	K16370	K16370	K16370	pfkB; 6-phosphofructokinase 2 [EC:2.7.1.11]
K00918	K00918	K00918
K01623 UN018807,UN032504,UN033232,UN036116,UN039509,UN041543	K01623 UN018807,UN032504	K01623 UN041543	K01623	ALDO; fructose-bisphosphate aldolase, class I [EC:4.1.2.13]
K01624	K01624	K01624	K01624	FBA, fbaA; fructose-bisphosphate aldolase, class II [EC:4.1.2.13]
K11645	K11645	K11645	K11645	fbaB; fructose-bisphosphate aldolase, class I [EC:4.1.2.13]
K16305	K16305	K16305	K16305	K16305; fructose-bisphosphate aldolase / 6-deoxy-5-ketofructose 1-phosphate synthase [EC:4.1.2.13 2.2.1.11]
K16306	K16306	K16306	K16306	K16306; fructose-bisphosphate aldolase / 2-amino-3,7-dideoxy-D-threo-hept-6-ulosonate synthase [EC:4.1.2.13 2.2.1.10]
K01803 UN006090,UN039499	K01803 UN039499	K01803	K01803	TPI, tpiA; triosephosphate isomerase (TIM) [EC:5.3.1.1]
K00134 UN022225,UN022397,UN024817,UN033789,UN035181,UN037394,UN039621	K00134 UN033789,UN024817,UN022397,UN035181,UN037394	K00134	K00134	GAPDH, gapA; glyceraldehyde 3-phosphate dehydrogenase [EC:1.2.1.12]
K00150	K00150	K00150	K00150	gap2; glyceraldehyde-3-phosphate dehydrogenase (NAD(P)) [EC:1.2.1.59]
K00927 UN021124,UN035149,UN038310,UN038382,UN039087	K00927 UN038382	K00927	K00927	PGK, pgk; phosphoglycerate kinase [EC:2.7.2.3]
K01834 UN021857,UN029001,UN034180,UN042451	K01834 UN034180	K01834 UN029001	K01834	PGAM, gpmA; 2,3-bisphosphoglycerate-dependent phosphoglycerate mutase [EC:5.4.2.11]
K15633 UN001083,UN018747,UN026308,UN043217	K15633	K15633	K15633	gpmI; 2,3-bisphosphoglycerate-independent phosphoglycerate mutase [EC:5.4.2.12]
K15634 UN023194,UN024715,UN025429,UN033088	K15634	K15634	K15634	gpmB; probable phosphoglycerate mutase [EC:5.4.2.12]
K15635	K15635	K15635	K15635	apgM; 2,3-bisphosphoglycerate-independent phosphoglycerate mutase [EC:5.4.2.12]
K01689 UN025634,UN035558	K01689	K01689	K01689	ENO, eno; enolase [EC:4.2.1.11]
K00873 UN000009,UN018743,UN019145,UN027350,UN036740,UN037166,UN037979,UN042071	K00873	K00873 UN019145,UN037979	K00873	PK, pyk; pyruvate kinase [EC:2.7.1.40]
K12406	K12406	K12406	K12406	PKLR; pyruvate kinase isozymes R/L [EC:2.7.1.40]
M00003 Gluconeogenesis, oxaloacetate => fructose-6P [PATH:map00010 map00020] (32) (complete)	M00003 Gluconeogenesis, oxaloacetate => fructose-6P [PATH:map00010 map00020] (12) (2 blocks missing)	M00003 Gluconeogenesis, oxaloacetate => fructose-6P [PATH:map00010 map00020] (2) (incomplete)	M00003	Gluconeogenesis, oxaloacetate => fructose-6P [PATH:map00010 map00020]
K01596	K01596	K01596	K01596	E4.1.1.32, pckA, PEPCK; phosphoenolpyruvate carboxykinase (GTP) [EC:4.1.1.32]
K01610 UN024814,UN035169,UN037173	K01610 UN035169,UN037173	K01610	K01610	E4.1.1.49, pckA; phosphoenolpyruvate carboxykinase (ATP) [EC:4.1.1.49]
K01689 UN025634,UN035558	K01689	K01689	K01689	ENO, eno; enolase [EC:4.2.1.11]
K01834 UN021857,UN029001,UN034180,UN042451	K01834 UN034180	K01834 UN029001	K01834	PGAM, gpmA; 2,3-bisphosphoglycerate-dependent phosphoglycerate mutase [EC:5.4.2.11]
K00927 UN021124,UN035149,UN038310,UN038382,UN039087	K00927 UN038382	K00927	K00927	PGK, pgk; phosphoglycerate kinase [EC:2.7.2.3]
K00134 UN022225,UN022397,UN024817,UN033789,UN035181,UN037394,UN039621	K00134 UN033789,UN024817,UN022397,UN035181,UN037394	K00134	K00134	GAPDH, gapA; glyceraldehyde 3-phosphate dehydrogenase [EC:1.2.1.12]
K01803 UN006090,UN039499	K01803 UN039499	K01803	K01803	TPI, tpiA; triosephosphate isomerase (TIM) [EC:5.3.1.1]
K01623 UN018807,UN032504,UN033232,UN036116,UN039509,UN041543	K01623 UN018807,UN032504	K01623 UN041543	K01623	ALDO; fructose-bisphosphate aldolase, class I [EC:4.1.2.13]
K01624	K01624	K01624	K01624	FBA, fbaA; fructose-bisphosphate aldolase, class II [EC:4.1.2.13]
K01622	K01622	K01622	K01622	K01622; fructose 1,6-bisphosphate aldolase/phosphatase [EC:4.1.2.13 3.1.3.11]
K03841 UN035947,UN038332,UN039612	K03841	K03841	K03841	FBP, fbp; fructose-1,6-bisphosphatase I [EC:3.1.3.11]
K02446	K02446	K02446	K02446	glpX; fructose-1,6-bisphosphatase II [EC:3.1.3.11]
K11532	K11532	K11532	K11532	glpX-SEBP; fructose-1,6-bisphosphatase II / sedoheptulose-1,7-bisphosphatase [EC:3.1.3.11 3.1.3.37]
K04041	K04041	K04041	K04041	fbp3; fructose-1,6-bisphosphatase III [EC:3.1.3.11]
K01622	K01622	K01622
M00307 Pyruvate oxidation, pyruvate => acetyl-CoA [PATH:map01200 map00010 map00020 map00620] (18) (complete)	M00307 Pyruvate oxidation, pyruvate => acetyl-CoA [PATH:map01200 map00010 map00020 map00620] (3) (1 block missing)	M00307 Pyruvate oxidation, pyruvate => acetyl-CoA [PATH:map01200 map00010 map00020 map00620] (1) (1 block missing)	M00307	Pyruvate oxidation, pyruvate => acetyl-CoA [PATH:map01200 map00010 map00020 map00620]
K00163	K00163	K00163	K00163	aceE; pyruvate dehydrogenase E1 component [EC:1.2.4.1]
K00161 UN012235,UN019708,UN021958,UN024380,UN024895,UN037139,UN038045,UN038951	K00161 UN024380	K00161	K00161	PDHA, pdhA; pyruvate dehydrogenase E1 component subunit alpha [EC:1.2.4.1]
K00162 UN008168,UN033463	K00162 UN008168,UN033463	K00162	K00162	PDHB, pdhB; pyruvate dehydrogenase E1 component subunit beta [EC:1.2.4.1]
K00627 UN007992,UN021822,UN033080,UN035580,UN043399	K00627	K00627 UN007992	K00627	DLAT, aceF, pdhC; pyruvate dehydrogenase E2 component (dihydrolipoamide acetyltransferase) [EC:2.3.1.12]
K00382 UN025482,UN031609,UN039532	K00382	K00382	K00382	DLD, lpd, pdhD; dihydrolipoamide dehydrogenase [EC:1.8.1.4]
K00169	K00169	K00169	K00169	porA; pyruvate ferredoxin oxidoreductase, alpha subunit [EC:1.2.7.1]
K00170	K00170	K00170	K00170	porB; pyruvate ferredoxin oxidoreductase, beta subunit [EC:1.2.7.1]
K00171	K00171	K00171	K00171	porD; pyruvate ferredoxin oxidoreductase, delta subunit [EC:1.2.7.1]
K00172	K00172	K00172	K00172	porG; pyruvate ferredoxin oxidoreductase, gamma subunit [EC:1.2.7.1]
M00009 Citrate cycle (TCA cycle, Krebs cycle) [PATH:map01200 map00020] (37) (1 block missing)	M00009 Citrate cycle (TCA cycle, Krebs cycle) [PATH:map01200 map00020] (12) (incomplete)	M00009 Citrate cycle (TCA cycle, Krebs cycle) [PATH:map01200 map00020] (1) (incomplete)	M00009	Citrate cycle (TCA cycle, Krebs cycle) [PATH:map01200 map00020]
K01647 UN019770,UN028808,UN029458,UN031546	K01647 UN019770,UN031546	K01647	K01647	CS, gltA; citrate synthase [EC:2.3.3.1]
K01681 UN010033,UN020525,UN027318,UN039345	K01681 UN010033,UN020525	K01681	K01681	ACO, acnA; aconitate hydratase [EC:4.2.1.3]
K01682	K01682	K01682	K01682	acnB; aconitate hydratase 2 / 2-methylisocitrate dehydratase [EC:4.2.1.3 4.2.1.99]
K00031 UN011388,UN027171,UN032150	K00031 UN011388	K00031	K00031	IDH1, IDH2, icd; isocitrate dehydrogenase [EC:1.1.1.42]
K00030 UN021071,UN037004	K00030	K00030	K00030	IDH3; isocitrate dehydrogenase (NAD+) [EC:1.1.1.41]
K00164 UN020861,UN040581	K00164	K00164 UN040581	K00164	OGDH, sucA; 2-oxoglutarate dehydrogenase E1 component [EC:1.2.4.2]
K00658 UN000928,UN015789,UN031785,UN032178	K00658 UN015789	K00658	K00658	DLST, sucB; 2-oxoglutarate dehydrogenase E2 component (dihydrolipoamide succinyltransferase) [EC:2.3.1.61]
K00382 UN025482,UN031609,UN039532	K00382	K00382	K00382	DLD, lpd, pdhD; dihydrolipoamide dehydrogenase [EC:1.8.1.4]
K00174	K00174	K00174	K00174	korA; 2-oxoglutarate ferredoxin oxidoreductase subunit alpha [EC:1.2.7.3]
K00175	K00175	K00175	K00175	korB; 2-oxoglutarate ferredoxin oxidoreductase subunit beta [EC:1.2.7.3]
K00177	K00177	K00177	K00177	korG; 2-oxoglutarate ferredoxin oxidoreductase subunit gamma [EC:1.2.7.3]
K00176	K00176	K00176	K00176	korD; 2-oxoglutarate ferredoxin oxidoreductase subunit delta [EC:1.2.7.3]
K01902	K01902	K01902	K01902	sucD; succinyl-CoA synthetase alpha subunit [EC:6.2.1.5]
K01903	K01903	K01903	K01903	sucC; succinyl-CoA synthetase beta subunit [EC:6.2.1.5]
K01899 UN018627,UN022494	K01899 UN018627	K01899	K01899	LSC1; succinyl-CoA synthetase alpha subunit [EC:6.2.1.4 6.2.1.5]
K01900 UN018900,UN039523	K01900	K01900	K01900	LSC2; succinyl-CoA synthetase beta subunit [EC:6.2.1.4 6.2.1.5]
K00239	K00239	K00239	K00239	sdhA; succinate dehydrogenase flavoprotein subunit [EC:1.3.99.1]
K00240	K00240	K00240	K00240	sdhB; succinate dehydrogenase iron-sulfur subunit [EC:1.3.99.1]
K00241	K00241	K00241	K00241	sdhC; succinate dehydrogenase cytochrome b556 subunit
K00242	K00242	K00242	K00242	sdhD; succinate dehydrogenase membrane anchor subunit
K00244	K00244	K00244	K00244	frdA; fumarate reductase flavoprotein subunit [EC:1.3.99.1]
K00245	K00245	K00245	K00245	frdB; fumarate reductase iron-sulfur subunit [EC:1.3.99.1]
K00246	K00246	K00246	K00246	frdC; fumarate reductase subunit C
K00247	K00247	K00247	K00247	frdD; fumarate reductase subunit D
K00234 UN000781,UN030065,UN035788,UN041967	K00234 UN000781,UN030065	K00234	K00234	SDHA, SDH1; succinate dehydrogenase (ubiquinone) flavoprotein subunit [EC:1.3.5.1]
K00235 UN039443	K00235	K00235	K00235	SDHB, SDH2; succinate dehydrogenase (ubiquinone) iron-sulfur subunit [EC:1.3.5.1]
K00236 UN021942	K00236 UN021942	K00236	K00236	SDHC, SDH3; succinate dehydrogenase (ubiquinone) cytochrome b560 subunit
K00237	K00237	K00237	K00237	SDHD, SDH4; succinate dehydrogenase (ubiquinone) membrane anchor subunit
K01676	K01676	K01676	K01676	E4.2.1.2A, fumA, fumB; fumarate hydratase, class I [EC:4.2.1.2]
K01679 UN021859	K01679	K01679	K01679	E4.2.1.2B, fumC; fumarate hydratase, class II [EC:4.2.1.2]
K01677	K01677	K01677	K01677	E4.2.1.2AA, fumA; fumarate hydratase subunit alpha [EC:4.2.1.2]
K01678	K01678	K01678	K01678	E4.2.1.2AB, fumB; fumarate hydratase subunit beta [EC:4.2.1.2]
K00026 UN020169,UN022438,UN029848	K00026 UN029848,UN022438	K00026	K00026	MDH2; malate dehydrogenase [EC:1.1.1.37]
K00025 UN019794	K00025	K00025	K00025	MDH1; malate dehydrogenase [EC:1.1.1.37]
K00024	K00024	K00024	K00024	mdh; malate dehydrogenase [EC:1.1.1.37]
M00004 Pentose phosphate pathway (Pentose phosphate cycle) [PATH:map01200 map00030] (22) (complete)	M00004 Pentose phosphate pathway (Pentose phosphate cycle) [PATH:map01200 map00030] (7) (incomplete)		M00004	Pentose phosphate pathway (Pentose phosphate cycle) [PATH:map01200 map00030]
K13937	K13937		K13937	H6PD; hexose-6-phosphate dehydrogenase [EC:1.1.1.47 3.1.1.31]
K00036 UN021269,UN024858,UN033284,UN034941	K00036 UN034941		K00036	G6PD, zwf; glucose-6-phosphate 1-dehydrogenase [EC:1.1.1.49]
K01057 UN019470	K01057		K01057	PGLS, pgl, devB; 6-phosphogluconolactonase [EC:3.1.1.31]
K07404	K07404		K07404	pgl; 6-phosphogluconolactonase [EC:3.1.1.31]
K00033 UN033746,UN037209	K00033		K00033	E1.1.1.44, PGD, gnd; 6-phosphogluconate dehydrogenase [EC:1.1.1.44]
K01783 UN023796,UN042335	K01783 UN023796		K01783	rpe, RPE; ribulose-phosphate 3-epimerase [EC:5.1.3.1]
K01807 UN001156,UN020973,UN034928,UN038648	K01807 UN020973		K01807	rpiA; ribose 5-phosphate isomerase A [EC:5.3.1.6]
K01808	K01808		K01808	rpiB; ribose 5-phosphate isomerase B [EC:5.3.1.6]
K00615 UN020466,UN032434,UN039590	K00615 UN020466,UN032434		K00615	E2.2.1.1, tktA, tktB; transketolase [EC:2.2.1.1]
K00616 UN015234,UN026136,UN032479,UN036782,UN042773	K00616 UN042773,UN015234		K00616	E2.2.1.2, talA, talB; transaldolase [EC:2.2.1.2]
K01810 UN029635	K01810		K01810	GPI, pgi; glucose-6-phosphate isomerase [EC:5.3.1.9]
K06859	K06859		K06859	pgi1; glucose-6-phosphate isomerase, archaeal [EC:5.3.1.9]
K13810	K13810		K13810	tal-pgi; transaldolase / glucose-6-phosphate isomerase [EC:2.2.1.2 5.3.1.9]
K15916	K15916		K15916	pgi-pmi; glucose/mannose-6-phosphate isomerase [EC:5.3.1.9 5.3.1.8]
M00005 PRPP biosynthesis, ribose 5P => PRPP [PATH:map01200 map01230 map00030 map00230] (2) (complete)	M00005 PRPP biosynthesis, ribose 5P => PRPP [PATH:map01200 map01230 map00030 map00230] (1) (complete)		M00005	PRPP biosynthesis, ribose 5P => PRPP [PATH:map01200 map01230 map00030 map00230]
K00948 UN016260,UN042764	K00948 UN016260		K00948	PRPS, prsA; ribose-phosphate pyrophosphokinase [EC:2.7.6.1]
Other carbohydrate metabolism	Other carbohydrate metabolism	Other carbohydrate metabolism
M00012 Glyoxylate cycle [PATH:map01200 map00630] (16) (complete)	M00012 Glyoxylate cycle [PATH:map01200 map00630] (8) (1 block missing)		M00012	Glyoxylate cycle [PATH:map01200 map00630]
K01647 UN019770,UN028808,UN029458,UN031546	K01647 UN019770,UN031546		K01647	CS, gltA; citrate synthase [EC:2.3.3.1]
K01681 UN010033,UN020525,UN027318,UN039345	K01681 UN010033,UN020525		K01681	ACO, acnA; aconitate hydratase [EC:4.2.1.3]
K01682	K01682		K01682	acnB; aconitate hydratase 2 / 2-methylisocitrate dehydratase [EC:4.2.1.3 4.2.1.99]
K01637 UN018929,UN039387	K01637 UN018929,UN039387		K01637	E4.1.3.1, aceA; isocitrate lyase [EC:4.1.3.1]
K01638 UN022341,UN039696	K01638		K01638	E2.3.3.9, aceB, glcB; malate synthase [EC:2.3.3.9]
K00026 UN020169,UN022438,UN029848	K00026 UN029848,UN022438		K00026	MDH2; malate dehydrogenase [EC:1.1.1.37]
K00025 UN019794	K00025		K00025	MDH1; malate dehydrogenase [EC:1.1.1.37]
K00024	K00024		K00024	mdh; malate dehydrogenase [EC:1.1.1.37]
M00532 Photorespiration [PATH:map00630] (40) (complete)	M00532 Photorespiration [PATH:map00630] (16) (2 blocks missing)	M00532 Photorespiration [PATH:map00630] (1) (incomplete)	M00532	Photorespiration [PATH:map00630]
K01601 UN044161	K01601 UN044161	K01601	K01601	rbcL; ribulose-bisphosphate carboxylase large chain [EC:4.1.1.39]
K01602 UN020129,UN033190,UN039423	K01602 UN039423,UN020129	K01602	K01602	rbcS; ribulose-bisphosphate carboxylase small chain [EC:4.1.1.39]
K01091 UN022394,UN038064	K01091 UN022394	K01091	K01091	E3.1.3.18, gph; phosphoglycolate phosphatase [EC:3.1.3.18]
K11517 UN035821,UN037053,UN052106	K11517 UN037053	K11517 UN052106	K11517	HAO; (S)-2-hydroxy-acid oxidase [EC:1.1.3.15]
K00104	K00104	K00104	K00104	glcD; glycolate oxidase [EC:1.1.3.15]
K11472	K11472	K11472	K11472	glcE; glycolate oxidase FAD binding subunit
K11473 UN006901	K11473	K11473	K11473	glcF; glycolate oxidase iron-sulfur subunit
K03781 UN001121,UN021519,UN024683,UN025720,UN029908,UN030131,UN035885,UN038355	K03781 UN029908,UN025720,UN021519,UN001121,UN024683,UN030131	K03781	K03781	katE, CAT, catB, srpA; catalase [EC:1.11.1.6]
K14272 UN033554,UN038955	K14272	K14272	K14272	GGAT; glutamate--glyoxylate aminotransferase [EC:2.6.1.4 2.6.1.2 2.6.1.44 2.6.1.-]
K00600 UN025091,UN028941,UN033272,UN039111,UN039518	K00600 UN033272,UN039518	K00600	K00600	glyA, SHMT; glycine hydroxymethyltransferase [EC:2.1.2.1]
K00830 UN022413,UN024636,UN037302,UN040744	K00830 UN022413	K00830	K00830	AGXT; alanine-glyoxylate transaminase / serine-glyoxylate transaminase / serine-pyruvate transaminase [EC:2.6.1.44 2.6.1.45 2.6.1.51]
K00018	K00018	K00018	K00018	hprA; glycerate dehydrogenase [EC:1.1.1.29]
K15893 UN024125,UN035092,UN037410,UN037820,UN039117	K15893 UN037410	K15893	K15893	HPR1; hydroxypyruvate reductase 1
K15919 UN019885,UN029841,UN040525	K15919	K15919	K15919	HPR2; hydroxypyruvate reductase 2
K15788	K15788	K15788	K15788	GLYCTK; glycerate kinase [EC:2.7.1.31]
K00865	K00865	K00865	K00865	glxK; glycerate kinase [EC:2.7.1.31]
K15918 UN018162,UN040224	K15918	K15918	K15918	GLYK; D-glycerate 3-kinase [EC:2.7.1.31]
K02437 UN038254	K02437 UN038254	K02437	K02437	gcvH, GCSH; glycine cleavage system H protein
M00013 Malonate semialdehyde pathway, propanoyl-CoA => Acetyl-CoA [PATH:map00640] (12) (complete)	M00013 Malonate semialdehyde pathway, propanoyl-CoA => Acetyl-CoA [PATH:map00640] (3) (2 blocks missing)	M00013 Malonate semialdehyde pathway, propanoyl-CoA => Acetyl-CoA [PATH:map00640] (2) (2 blocks missing)	M00013	Malonate semialdehyde pathway, propanoyl-CoA => Acetyl-CoA [PATH:map00640]
K00249 UN012353,UN017885,UN033633,UN043381	K00249 UN012353	K00249 UN017885	K00249	ACADM, acd; acyl-CoA dehydrogenase [EC:1.3.8.7]
K07511 UN033778	K07511	K07511	K07511	ECHS1; enoyl-CoA hydratase [EC:4.2.1.17]
K07514	K07514	K07514	K07514	EHHADH; enoyl-CoA hydratase / 3-hydroxyacyl-CoA dehydrogenase / 3,2-trans-enoyl-CoA isomerase [EC:4.2.1.17 1.1.1.35 5.3.3.8]
K07515	K07515	K07515	K07515	HADHA; enoyl-CoA hydratase / long-chain 3-hydroxyacyl-CoA dehydrogenase [EC:4.2.1.17 1.1.1.211]
K05605 UN021413,UN023912,UN035552,UN038745	K05605 UN023912,UN038745	K05605 UN021413	K05605	HIBCH; 3-hydroxyisobutyryl-CoA hydrolase [EC:3.1.2.4]
K00140 UN028032,UN031780,UN044471	K00140	K00140	K00140	mmsA, iolA, ALDH6A1; malonate-semialdehyde dehydrogenase (acetylating) / methylmalonate-semialdehyde dehydrogenase [EC:1.2.1.18 1.2.1.27]
M00014 Glucuronate pathway (uronate pathway) [PATH:map00040] (4) (incomplete)		M00014 Glucuronate pathway (uronate pathway) [PATH:map00040] (1) (incomplete)	M00014	Glucuronate pathway (uronate pathway) [PATH:map00040]
K00012 UN038909		K00012	K00012	UGDH, ugd; UDPglucose 6-dehydrogenase [EC:1.1.1.22]
K12447 UN035992		K12447 UN035992	K12447	USP; UDP-sugar pyrophosphorylase [EC:2.7.7.64]
K16190 UN042281		K16190	K16190	GLCAK; glucuronokinase [EC:2.7.1.43]
K13247		K13247	K13247	CRYL1; L-gulonate 3-dehydrogenase [EC:1.1.1.45]
K03331		K03331	K03331	DCXR; L-xylulose reductase [EC:1.1.1.10]
K05351		K05351	K05351	E1.1.1.9; D-xylulose reductase [EC:1.1.1.9]
K00854 UN023722		K00854	K00854	xylB, XYLB; xylulokinase [EC:2.7.1.17]
M00081 Pectin degradation [PATH:map00040] (3) (1 block missing)	M00081 Pectin degradation [PATH:map00040] (1) (2 blocks missing)		M00081	Pectin degradation [PATH:map00040]
K01051 UN021815,UN029896	K01051 UN029896		K01051	E3.1.1.11; pectinesterase [EC:3.1.1.11]
K01184 UN029208	K01184		K01184	E3.2.1.15; polygalacturonase [EC:3.2.1.15]
K01213	K01213		K01213	E3.2.1.67; galacturan 1,4-alpha-galacturonidase [EC:3.2.1.67]
Fatty acid metabolism	Fatty acid metabolism	Fatty acid metabolism	Fatty	acid metabolism
M00082 Fatty acid biosynthesis, initiation [PATH:map01212 map00061] (14) (complete)	M00082 Fatty acid biosynthesis, initiation [PATH:map01212 map00061] (2) (2 blocks missing)	M00082 Fatty acid biosynthesis, initiation [PATH:map01212 map00061] (2) (1 block missing)	M00082	Fatty acid biosynthesis, initiation [PATH:map01212 map00061]
K01962 UN024996,UN025080	K01962	K01962	K01962	accA; acetyl-CoA carboxylase carboxyl transferase subunit alpha [EC:6.4.1.2]
K01963 UN020640	K01963 UN020640	K01963	K01963	accD; acetyl-CoA carboxylase carboxyl transferase subunit beta [EC:6.4.1.2]
K02160 UN005064,UN037750	K02160 UN005064	K02160	K02160	accB, bccP; acetyl-CoA carboxylase biotin carboxyl carrier protein
K01961 UN000618,UN039605	K01961	K01961 UN000618	K01961	accC; acetyl-CoA carboxylase, biotin carboxylase subunit [EC:6.4.1.2 6.3.4.14]
K11263	K11263	K11263	K11263	bccA; acetyl-/propionyl-CoA carboxylase, biotin carboxylase, biotin carboxyl carrier protein [EC:6.3.4.14]
K11262 UN019712,UN040326,UN040621	K11262	K11262 UN040326	K11262	ACAC; acetyl-CoA carboxylase / biotin carboxylase [EC:6.4.1.2 6.3.4.14]
K00645 UN035462,UN038289	K00645	K00645	K00645	fabD; [acyl-carrier-protein] S-malonyltransferase [EC:2.3.1.39]
K13935	K13935	K13935	K13935	mdcH; malonate decarboxylase epsilon subunit [EC:2.3.1.39]
K00648 UN029893,UN032025	K00648	K00648	K00648	fabH; 3-oxoacyl-[acyl-carrier-protein] synthase III [EC:2.3.1.180]
K11533	K11533	K11533	K11533	fas; fatty acid synthase, bacteria type [EC:2.3.1.-]
K00667	K00667	K00667	K00667	FAS2; fatty acid synthase subunit alpha, fungi type [EC:2.3.1.86]
K00668	K00668	K00668	K00668	FAS1; fatty acid synthase subunit beta, fungi type [EC:2.3.1.86]
K00665	K00665	K00665	K00665	FASN; fatty acid synthase, animal type [EC:2.3.1.85]
M00083 Fatty acid biosynthesis, elongation [PATH:map01212 map00061] (31) (complete)	M00083 Fatty acid biosynthesis, elongation [PATH:map01212 map00061] (9) (1 block missing)	M00083 Fatty acid biosynthesis, elongation [PATH:map01212 map00061] (2) (1 block missing)	M00083	Fatty acid biosynthesis, elongation [PATH:map01212 map00061]
K00665	K00665	K00665	K00665	FASN; fatty acid synthase, animal type [EC:2.3.1.85]
K00667	K00667	K00667	K00667	FAS2; fatty acid synthase subunit alpha, fungi type [EC:2.3.1.86]
K00668	K00668	K00668	K00668	FAS1; fatty acid synthase subunit beta, fungi type [EC:2.3.1.86]
K11533	K11533	K11533	K11533	fas; fatty acid synthase, bacteria type [EC:2.3.1.-]
K00647	K00647	K00647	K00647	fabB; 3-oxoacyl-[acyl-carrier-protein] synthase I [EC:2.3.1.41]
K09458 UN004507,UN026740,UN031683,UN033967,UN033995,UN039685,UN043058	K09458	K09458 UN043058	K09458	fabF; 3-oxoacyl-[acyl-carrier-protein] synthase II [EC:2.3.1.179]
K00648 UN029893,UN032025	K00648	K00648	K00648	fabH; 3-oxoacyl-[acyl-carrier-protein] synthase III [EC:2.3.1.180]
K00059 UN021649,UN022582,UN025220,UN027251,UN028276,UN028432,UN028564,UN028580,UN030160,UN030692,UN031701,UN034373,UN035173,UN036079,UN037663,UN038431,UN038801,UN042283,UN051062	K00059 UN036079,UN028580,UN038431,UN028276,UN034373,UN042283,UN027251,UN028564,UN051062	K00059 UN035173	K00059	fabG; 3-oxoacyl-[acyl-carrier protein] reductase [EC:1.1.1.100]
K02372 UN023291	K02372	K02372	K02372	fabZ; 3-hydroxyacyl-[acyl-carrier-protein] dehydratase [EC:4.2.1.59]
K01716	K01716	K01716	K01716	fabA; 3-hydroxyacyl-[acyl-carrier-protein] dehydratase [EC:4.2.1.59]
K16363	K16363	K16363	K16363	lpxC-fabZ; UDP-3-O-[3-hydroxymyristoyl] N-acetylglucosamine deacetylase / 3-hydroxyacyl-[acyl-carrier-protein] dehydratase [EC:3.5.1.108 4.2.1.59]
K00208 UN018762,UN028811	K00208	K00208	K00208	fabI; enoyl-[acyl-carrier protein] reductase I [EC:1.3.1.9 1.3.1.10]
K02371	K02371	K02371	K02371	fabK; enoyl-[acyl-carrier protein] reductase II [EC:1.3.1.-]
K10780	K10780	K10780	K10780	fabL; enoyl-[acyl-carrier protein] reductase III [EC:1.3.1.-]
M00085 Fatty acid biosynthesis, elongation, mitochondria [PATH:map01212 map00062] (5) (2 blocks missing)	M00085 Fatty acid biosynthesis, elongation, mitochondria [PATH:map01212 map00062] (1) (2 blocks missing)	M00085 Fatty acid biosynthesis, elongation, mitochondria [PATH:map01212 map00062] (1) (2 blocks missing)	M00085	Fatty acid biosynthesis, elongation, mitochondria [PATH:map01212 map00062]
K07508	K07508	K07508	K07508	ACAA2; acetyl-CoA acyltransferase 2 [EC:2.3.1.16]
K07509	K07509	K07509	K07509	HADHB; acetyl-CoA acyltransferase [EC:2.3.1.16]
K00022	K00022	K00022	K00022	HADH; 3-hydroxyacyl-CoA dehydrogenase [EC:1.1.1.35]
K07511 UN033778	K07511	K07511	K07511	ECHS1; enoyl-CoA hydratase [EC:4.2.1.17]
K07515	K07515	K07515	K07515	HADHA; enoyl-CoA hydratase / long-chain 3-hydroxyacyl-CoA dehydrogenase [EC:4.2.1.17 1.1.1.211]
K07512 UN026613,UN028419,UN028644,UN031537	K07512 UN028644	K07512 UN026613	K07512	MECR, NRBF1; mitochondrial trans-2-enoyl-CoA reductase [EC:1.3.1.38]
M00415 Fatty acid biosynthesis, elongation, endoplasmic reticulum [PATH:map01212 map00062] (10) (complete)	M00415 Fatty acid biosynthesis, elongation, endoplasmic reticulum [PATH:map01212 map00062] (2) (incomplete)		M00415	Fatty acid biosynthesis, elongation, endoplasmic reticulum [PATH:map01212 map00062]
K10247	K10247		K10247	ELOVL1; elongation of very long chain fatty acids protein 1 [EC:2.3.1.199]
K10205	K10205		K10205	ELOVL2; elongation of very long chain fatty acids protein 2 [EC:2.3.1.199]
K10248	K10248		K10248	ELOVL3; elongation of very long chain fatty acids protein 3 [EC:2.3.1.199]
K10249	K10249		K10249	ELOVL4; elongation of very long chain fatty acids protein 4 [EC:2.3.1.199]
K10244 UN036100	K10244 UN036100		K10244	ELOVL5; elongation of very long chain fatty acids protein 5 [EC:2.3.1.199]
K10203	K10203		K10203	ELOVL6; elongation of very long chain fatty acids protein 6 [EC:2.3.1.199]
K10250	K10250		K10250	ELOVL7; elongation of very long chain fatty acids protein 7 [EC:2.3.1.199]
K15397 UN020659,UN038039	K15397 UN038039		K15397	KCS; 3-ketoacyl-CoA synthase [EC:2.3.1.199]
K10245	K10245		K10245	ELO2; fatty acid elongase 2 [EC:2.3.1.199]
K10246	K10246		K10246	ELO3; fatty acid elongase 3 [EC:2.3.1.199]
K10251 UN022313,UN051889	K10251		K10251	HSD17B12, KAR, IFA38; 17beta-estradiol 17-dehydrogenase / very-long-chain 3-oxoacyl-CoA reductase [EC:1.1.1.62 1.1.1.330]
K10703 UN010764,UN026792,UN035646	K10703		K10703	PHS1, PAS2; very-long-chain (3R)-3-hydroxyacyl-[acyl-carrier protein] dehydratase [EC:4.2.1.134]
K10258 UN027472,UN029335	K10258		K10258	TER, TSC13, CER10; very-long-chain enoyl-CoA reductase [EC:1.3.1.93]
M00113 Jasmonic acid biosynthesis [PATH:map00592] (19) (2 blocks missing)	M00113 Jasmonic acid biosynthesis [PATH:map00592] (5) (incomplete)	M00113 Jasmonic acid biosynthesis [PATH:map00592] (3) (incomplete)	M00113	Jasmonic acid biosynthesis [PATH:map00592]
K00454 UN032407,UN036658,UN043204	K00454	K00454 UN032407,UN043204	K00454	LOX2S; lipoxygenase [EC:1.13.11.12]
K01723 UN006152,UN038353	K01723 UN038353	K01723	K01723	AOS; hydroperoxide dehydratase [EC:4.2.1.92]
K10525	K10525	K10525	K10525	E5.3.99.6, aoc; allene oxide cyclase [EC:5.3.99.6]
K05894 UN022278	K05894	K05894	K05894	E1.3.1.42; 12-oxophytodienoic acid reductase [EC:1.3.1.42]
K10526	K10526	K10526	K10526	OPCL1; OPC-8:0 CoA ligase 1 [EC:6.2.1.-]
K00232 UN000289,UN003713,UN017264,UN018724,UN028761,UN030179,UN038268,UN040403,UN044554	K00232 UN003713,UN028761,UN018724	K00232 UN000289	K00232	E1.3.3.6, ACOX1, ACOX3; acyl-CoA oxidase [EC:1.3.3.6]
K10527 UN039099	K10527	K10527	K10527	MFP2; enoyl-CoA hydratase/3-hydroxyacyl-CoA dehydrogenase [EC:4.2.1.17 1.1.1.35 1.1.1.211]
K00632	K00632	K00632	K00632	E2.3.1.16, fadA; acetyl-CoA acyltransferase [EC:2.3.1.16]
K07513 UN014839,UN035299,UN042150	K07513 UN014839	K07513	K07513	ACAA1; acetyl-CoA acyltransferase 1 [EC:2.3.1.16]
M00086 beta-Oxidation, acyl-CoA synthesis [PATH:map01212 map00071] (14) (complete)	M00086 beta-Oxidation, acyl-CoA synthesis [PATH:map01212 map00071] (4) (complete)		M00086	beta-Oxidation, acyl-CoA synthesis [PATH:map01212 map00071]
K01897 UN000004,UN020116,UN022053,UN027109,UN027367,UN027917,UN028787,UN032679,UN034395,UN034489,UN037544,UN038138,UN039135,UN039365	K01897 UN027917,UN032679,UN027109,UN039365		K01897	ACSL, fadD; long-chain acyl-CoA synthetase [EC:6.2.1.3]
K15013	K15013		K15013	ACSBG; long-chain-fatty-acid--CoA ligase ACSBG [EC:6.2.1.3]
M00087 beta-Oxidation [PATH:map01212 map00071] (18) (complete)	M00087 beta-Oxidation [PATH:map01212 map00071] (5) (1 block missing)	M00087 beta-Oxidation [PATH:map01212 map00071] (2) (2 blocks missing)	M00087	beta-Oxidation [PATH:map01212 map00071]
K00232 UN000289,UN003713,UN017264,UN018724,UN028761,UN030179,UN038268,UN040403,UN044554	K00232 UN003713,UN028761,UN018724	K00232 UN000289	K00232	E1.3.3.6, ACOX1, ACOX3; acyl-CoA oxidase [EC:1.3.3.6]
K00249 UN012353,UN017885,UN033633,UN043381	K00249 UN012353	K00249 UN017885	K00249	ACADM, acd; acyl-CoA dehydrogenase [EC:1.3.8.7]
K00255	K00255	K00255	K00255	ACADL; long-chain-acyl-CoA dehydrogenase [EC:1.3.8.8]
K06445	K06445	K06445	K06445	fadE; acyl-CoA dehydrogenase [EC:1.3.99.-]
K09479	K09479	K09479	K09479	ACADVL; very long chain acyl-CoA dehydrogenase [EC:1.3.8.9]
K01692	K01692	K01692	K01692	paaF, echA; enoyl-CoA hydratase [EC:4.2.1.17]
K07511 UN033778	K07511	K07511	K07511	ECHS1; enoyl-CoA hydratase [EC:4.2.1.17]
K13767	K13767	K13767	K13767	ysiB, fadB; enoyl-CoA hydratase [EC:4.2.1.17]
K00022	K00022	K00022	K00022	HADH; 3-hydroxyacyl-CoA dehydrogenase [EC:1.1.1.35]
K07516	K07516	K07516	K07516	fadN; 3-hydroxyacyl-CoA dehydrogenase [EC:1.1.1.35]
K01825	K01825	K01825	K01825	fadB; 3-hydroxyacyl-CoA dehydrogenase / enoyl-CoA hydratase / 3-hydroxybutyryl-CoA epimerase / enoyl-CoA isomerase [EC:1.1.1.35 4.2.1.17 5.1.2.3 5.3.3.8]
K01782	K01782	K01782	K01782	fadJ; 3-hydroxyacyl-CoA dehydrogenase / enoyl-CoA hydratase / 3-hydroxybutyryl-CoA epimerase [EC:1.1.1.35 4.2.1.17 5.1.2.3]
K07514	K07514	K07514	K07514	EHHADH; enoyl-CoA hydratase / 3-hydroxyacyl-CoA dehydrogenase / 3,2-trans-enoyl-CoA isomerase [EC:4.2.1.17 1.1.1.35 5.3.3.8]
K07515	K07515	K07515	K07515	HADHA; enoyl-CoA hydratase / long-chain 3-hydroxyacyl-CoA dehydrogenase [EC:4.2.1.17 1.1.1.211]
K10527 UN039099	K10527	K10527	K10527	MFP2; enoyl-CoA hydratase/3-hydroxyacyl-CoA dehydrogenase [EC:4.2.1.17 1.1.1.35 1.1.1.211]
K00632	K00632	K00632	K00632	E2.3.1.16, fadA; acetyl-CoA acyltransferase [EC:2.3.1.16]
K07508	K07508	K07508	K07508	ACAA2; acetyl-CoA acyltransferase 2 [EC:2.3.1.16]
K07509	K07509	K07509	K07509	HADHB; acetyl-CoA acyltransferase [EC:2.3.1.16]
K07513 UN014839,UN035299,UN042150	K07513 UN014839	K07513	K07513	ACAA1; acetyl-CoA acyltransferase 1 [EC:2.3.1.16]
M00088 Ketone body biosynthesis, acetyl-CoA => acetoacetate/3-hydroxybutyrate/acetone [PATH:map00072] (7) (2 blocks missing)		M00088 Ketone body biosynthesis, acetyl-CoA => acetoacetate/3-hydroxybutyrate/acetone [PATH:map00072] (1) (incomplete)	M00088	Ketone body biosynthesis, acetyl-CoA => acetoacetate/3-hydroxybutyrate/acetone [PATH:map00072]
K00626 UN001165,UN020595,UN027166,UN037575		K00626 UN020595	K00626	E2.3.1.9, atoB; acetyl-CoA C-acetyltransferase [EC:2.3.1.9]
K01641 UN041049		K01641	K01641	E2.3.3.10; hydroxymethylglutaryl-CoA synthase [EC:2.3.3.10]
K01640 UN026086,UN039154		K01640	K01640	E4.1.3.4, HMGCL, hmgL; hydroxymethylglutaryl-CoA lyase [EC:4.1.3.4]
K00019		K00019	K00019	E1.1.1.30, bdh; 3-hydroxybutyrate dehydrogenase [EC:1.1.1.30]
K01574		K01574	K01574	adc; acetoacetate decarboxylase [EC:4.1.1.4]
Lipid metabolism	Lipid metabolism	Lipid metabolism
M00089 Triacylglycerol biosynthesis [PATH:map00561] (15) (complete)	M00089 Triacylglycerol biosynthesis [PATH:map00561] (5) (1 block missing)	M00089 Triacylglycerol biosynthesis [PATH:map00561] (1) (incomplete)	M00089	Triacylglycerol biosynthesis [PATH:map00561]
K00629	K00629	K00629	K00629	GPAT1_2; glycerol-3-phosphate O-acyltransferase 1/2 [EC:2.3.1.15]
K13506 UN001389,UN030154	K13506	K13506	K13506	GPAT3_4, AGPAT9, AGPAT6; glycerol-3-phosphate O-acyltransferase 3/4 [EC:2.3.1.15]
K13507	K13507	K13507	K13507	GAT; glycerol-3-phosphate O-acyltransferase / dihydroxyacetone phosphate acyltransferase [EC:2.3.1.15 2.3.1.42]
K00630 UN013662	K00630	K00630	K00630	ATS1; glycerol-3-phosphate O-acyltransferase [EC:2.3.1.15]
K13508	K13508	K13508	K13508	GPAT; glycerol-3-phosphate acyltransferase [EC:2.3.1.15]
K00631	K00631	K00631	K00631	plsB; glycerol-3-phosphate O-acyltransferase [EC:2.3.1.15]
K03621	K03621	K03621	K03621	plsX; glycerol-3-phosphate acyltransferase PlsX [EC:2.3.1.15]
K08591	K08591	K08591	K08591	plsY; glycerol-3-phosphate acyltransferase PlsY [EC:2.3.1.15]
K00655 UN034802,UN040758	K00655	K00655	K00655	plsC; 1-acyl-sn-glycerol-3-phosphate acyltransferase [EC:2.3.1.51]
K13509	K13509	K13509	K13509	LPAAT, AGPAT1, AGPAT2; lysophosphatidate acyltransferase [EC:2.3.1.51]
K13513 UN030677,UN048295	K13513	K13513	K13513	LCLAT1, AGPAT8; lysocardiolipin and lysophospholipid acyltransferase [EC:2.3.1.- 2.3.1.51]
K13517	K13517	K13517	K13517	MBOAT1_2; lysophospholipid acyltransferase 1/2 [EC:2.3.1.51 2.3.1.-]
K13519 UN016984,UN017518,UN034647,UN052525	K13519 UN052525,UN016984,UN034647	K13519 UN017518	K13519	LPT1, ALE1; lysophospholipid acyltransferase [EC:2.3.1.51 2.3.1.23 2.3.1.-]
K13523 UN031884	K13523	K13523	K13523	AGPAT3_4; lysophosphatidic acid acyltransferase / lysophosphatidylinositol acyltransferase [EC:2.3.1.51 2.3.1.-]
K14674 UN007643	K14674	K14674	K14674	TGL4; TAG lipase / steryl ester hydrolase / phospholipase A2 / LPA acyltransferase [EC:3.1.1.3 3.1.1.13 3.1.1.4 2.3.1.51]
K01080 UN036451	K01080 UN036451	K01080	K01080	PPAP2; phosphatidate phosphatase [EC:3.1.3.4]
K00635	K00635	K00635	K00635	E2.3.1.20; diacylglycerol O-acyltransferase [EC:2.3.1.20]
K11155 UN001097	K11155 UN001097	K11155	K11155	DGAT1; diacylglycerol O-acyltransferase 1 [EC:2.3.1.20 2.3.1.75 2.3.1.76]
K11160	K11160	K11160	K11160	DGAT2; diacylglycerol O-acyltransferase 2 [EC:2.3.1.20 2.3.1.75]
M00098 Acylglycerol degradation [PATH:map00561] (3) (complete)	M00098 Acylglycerol degradation [PATH:map00561] (1) (1 block missing)		M00098	Acylglycerol degradation [PATH:map00561]
K01046	K01046		K01046	E3.1.1.3; triacylglycerol lipase [EC:3.1.1.3]
K12298	K12298		K12298	CEL; bile salt-stimulated lipase [EC:3.1.1.3 3.1.1.13]
K16816	K16816		K16816	PNPLA2, ATGL; patatin-like phospholipase domain-containing protein 2 [EC:3.1.1.3]
K13534	K13534		K13534	PNPLA3; patatin-like phospholipase domain-containing protein 3 [EC:3.1.1.3 2.3.1.-]
K14073	K14073		K14073	PNLIP, PL; pancreatic triacylglycerol lipase [EC:3.1.1.3]
K14074	K14074		K14074	PNLIPRP1, PLRP1; pancreatic lipase-related protein 1 [EC:3.1.1.3]
K14075	K14075		K14075	PNLIPRP2, PLRP2; pancreatic lipase-related protein 2 [EC:3.1.1.3]
K14076	K14076		K14076	PNLIPRP3, PLRP3; pancreatic lipase-related protein 3 [EC:3.1.1.3]
K14452	K14452		K14452	LIPF; gastric triacylglycerol lipase [EC:3.1.1.3]
K14674 UN007643	K14674		K14674	TGL4; TAG lipase / steryl ester hydrolase / phospholipase A2 / LPA acyltransferase [EC:3.1.1.3 3.1.1.13 3.1.1.4 2.3.1.51]
K14675	K14675		K14675	TGL3; TAG lipase / lysophosphatidylethanolamine acyltransferase [EC:3.1.1.3 2.3.1.-]
K01054 UN024118,UN024736	K01054 UN024118		K01054	MGLL; acylglycerol lipase [EC:3.1.1.23]
M00090 Phosphatidylcholine (PC) biosynthesis, choline => PC [PATH:map00564] (3) (1 block missing)	M00090 Phosphatidylcholine (PC) biosynthesis, choline => PC [PATH:map00564] (1) (2 blocks missing)		M00090	Phosphatidylcholine (PC) biosynthesis, choline => PC [PATH:map00564]
K00866	K00866		K00866	CKI1; choline kinase [EC:2.7.1.32]
K14156 UN039075	K14156 UN039075		K14156	CHK; choline/ethanolamine kinase [EC:2.7.1.32 2.7.1.82]
K00968 UN037817,UN039267	K00968		K00968	PCYT1; choline-phosphate cytidylyltransferase [EC:2.7.7.15]
K00994	K00994		K00994	CHPT1, CPT1; diacylglycerol cholinephosphotransferase [EC:2.7.8.2]
K13644	K13644		K13644	CEPT1; choline/ethanolamine phosphotransferase [EC:2.7.8.1 2.7.8.2]
M00091 Phosphatidylcholine (PC) biosynthesis, PE => PC [PATH:map00564] (1) (1 block missing)	M00091 Phosphatidylcholine (PC) biosynthesis, PE => PC [PATH:map00564] (1) (1 block missing)		M00091	Phosphatidylcholine (PC) biosynthesis, PE => PC [PATH:map00564]
K00551	K00551		K00551	PEMT; phosphatidylethanolamine N-methyltransferase [EC:2.1.1.17]
K16369	K16369		K16369	CHO2; phosphatidylethanolamine N-methyltransferase [EC:2.1.1.17]
K00550 UN022102	K00550 UN022102		K00550	OPI3; methylene-fatty-acyl-phospholipid synthase [EC:2.1.1.16]
K00570	K00570		K00570	pmtA; phosphatidylethanolamine/phosphatidyl-N-methylethanolamine N-methyltransferase [EC:2.1.1.17 2.1.1.71]
M00092 Phosphatidylethanolamine (PE) biosynthesis, ethanolamine => PE [PATH:map00564] (6) (complete)	M00092 Phosphatidylethanolamine (PE) biosynthesis, ethanolamine => PE [PATH:map00564] (3) (1 block missing)	M00092 Phosphatidylethanolamine (PE) biosynthesis, ethanolamine => PE [PATH:map00564] (1) (2 blocks missing)	M00092	Phosphatidylethanolamine (PE) biosynthesis, ethanolamine => PE [PATH:map00564]
K00894 UN035538	K00894 UN035538	K00894	K00894	ETNK, EKI; ethanolamine kinase [EC:2.7.1.82]
K14156 UN039075	K14156 UN039075	K14156	K14156	CHK; choline/ethanolamine kinase [EC:2.7.1.32 2.7.1.82]
K00967 UN024655	K00967	K00967	K00967	PCYT2; ethanolamine-phosphate cytidylyltransferase [EC:2.7.7.14]
K00993 UN005660,UN018167,UN018941	K00993 UN018941	K00993 UN005660	K00993	EPT1; ethanolaminephosphotransferase [EC:2.7.8.1]
K13644	K13644	K13644	K13644	CEPT1; choline/ethanolamine phosphotransferase [EC:2.7.8.1 2.7.8.2]
M00093 Phosphatidylethanolamine (PE) biosynthesis, PA => PS => PE [PATH:map00564] (3) (1 block missing)			M00093	Phosphatidylethanolamine (PE) biosynthesis, PA => PS => PE [PATH:map00564]
K00981 UN000979,UN024662			K00981	E2.7.7.41, CDS1, CDS2, cdsA; phosphatidate cytidylyltransferase [EC:2.7.7.41]
K00998			K00998	pssA; CDP-diacylglycerol---serine O-phosphatidyltransferase [EC:2.7.8.8]
K17103			K17103	CHO1, pssA; CDP-diacylglycerol---serine O-phosphatidyltransferase [EC:2.7.8.8]
K01613 UN031898			K01613	psd, PISD; phosphatidylserine decarboxylase [EC:4.1.1.65]
M00130 Inositol phosphate metabolism, PI=> PIP2 => Ins(1,4,5)P3 => Ins(1,3,4,5)P4 [PATH:map00562] (10) (1 block missing)	M00130 Inositol phosphate metabolism, PI=> PIP2 => Ins(1,4,5)P3 => Ins(1,3,4,5)P4 [PATH:map00562] (2) (incomplete)	M00130 Inositol phosphate metabolism, PI=> PIP2 => Ins(1,4,5)P3 => Ins(1,3,4,5)P4 [PATH:map00562] (3) (2 blocks missing)	M00130	Inositol phosphate metabolism, PI=> PIP2 => Ins(1,4,5)P3 => Ins(1,3,4,5)P4 [PATH:map00562]
K00888 UN003502,UN023875,UN041107	K00888	K00888 UN041107	K00888	PI4K; phosphatidylinositol 4-kinase [EC:2.7.1.67]
K13711	K13711	K13711	K13711	PI4K2; phosphatidylinositol 4-kinase type 2 [EC:2.7.1.67]
K00889 UN003849,UN020143,UN040981	K00889	K00889 UN020143,UN003849	K00889	E2.7.1.68, PIP5K; 1-phosphatidylinositol-4-phosphate 5-kinase [EC:2.7.1.68]
K13712	K13712	K13712	K13712	PIP5KL1; phosphatidylinositol-4-phosphate 5-kinase-like protein 1 [EC:2.7.1.68]
K01116	K01116	K01116	K01116	PLCG1; phosphatidylinositol phospholipase C, gamma-1 [EC:3.1.4.11]
K05857 UN022410,UN043128,UN043941,UN044460	K05857 UN043941,UN022410	K05857	K05857	PLCD; phosphatidylinositol phospholipase C, delta [EC:3.1.4.11]
K05858	K05858	K05858	K05858	PLCB; phosphatidylinositol phospholipase C, beta [EC:3.1.4.11]
K05859	K05859	K05859	K05859	PLCG2; phosphatidylinositol phospholipase C, gamma-2 [EC:3.1.4.11]
K05860	K05860	K05860	K05860	PLCE; phosphatidylinositol phospholipase C, epsilon [EC:3.1.4.11]
K05861	K05861	K05861	K05861	PLCZ; phosphatidylinositol phospholipase C, zeta [EC:3.1.4.11]
K00911	K00911	K00911	K00911	E2.7.1.127, ITPK; 1D-myo-inositol-triphosphate 3-kinase [EC:2.7.1.127]
M00131 Inositol phosphate metabolism, Ins(1,3,4,5)P4 => Ins(1,3,4)P3 => myo-inositol [PATH:map00562] (9) (2 blocks missing)		M00131 Inositol phosphate metabolism, Ins(1,3,4,5)P4 => Ins(1,3,4)P3 => myo-inositol [PATH:map00562] (2) (incomplete)	M00131	Inositol phosphate metabolism, Ins(1,3,4,5)P4 => Ins(1,3,4)P3 => myo-inositol [PATH:map00562]
K01106		K01106	K01106	E3.1.3.56; inositol-1,4,5-trisphosphate 5-phosphatase [EC:3.1.3.56]
K01107		K01107	K01107	INPP1; inositol polyphosphate 1-phosphatase [EC:3.1.3.57]
K15422 UN046665		K15422	K15422	SAL; 3'(2'), 5'-bisphosphate nucleotidase / inositol polyphosphate 1-phosphatase [EC:3.1.3.7 3.1.3.57]
K01109		K01109	K01109	INPP4; inositol polyphosphate-4-phosphatase [EC:3.1.3.66]
K01092 UN021861,UN026765,UN031587,UN032752,UN042908,UN043398,UN043437,UN051144		K01092 UN031587,UN026765	K01092	E3.1.3.25, IMPA, suhB; myo-inositol-1(or 4)-monophosphatase [EC:3.1.3.25]
K15759		K15759	K15759	IMPAD1, IMPA3; inositol monophosphatase 3 [EC:3.1.3.25 3.1.3.7]
K10047		K10047	K10047	VTC4; inositol-phosphate phosphatase / L-galactose 1-phosphate phosphatase [EC:3.1.3.25 3.1.3.-]
M00132 Inositol phosphate metabolism, Ins(1,3,4)P3 => phytate [PATH:map00562] (4) (complete)			M00132	Inositol phosphate metabolism, Ins(1,3,4)P3 => phytate [PATH:map00562]
K00913 UN023635			K00913	ITPK1; inositol-1,3,4-trisphosphate 5/6-kinase / inositol-tetrakisphosphate 1-kinase [EC:2.7.1.159 2.7.1.134]
K00915 UN039028			K00915	IPK2; 1D-myo-Inositol-tetrakisphosphate 5-kinase / inositol-polyphosphate multikinase [EC:2.7.1.140 2.7.1.151]
K10572 UN040220,UN043970			K10572	IPPK; inositol-pentakisphosphate 2-kinase [EC:2.7.1.158]
M00094 Ceramide biosynthesis [PATH:map00600] (13) (complete)	M00094 Ceramide biosynthesis [PATH:map00600] (4) (2 blocks missing)		M00094	Ceramide biosynthesis [PATH:map00600]
K00654 UN001541,UN014263,UN035270	K00654		K00654	E2.3.1.50; serine palmitoyltransferase [EC:2.3.1.50]
K04708 UN015579,UN030545,UN032984,UN033087,UN033677,UN042139	K04708 UN033677,UN032984,UN033087		K04708	E1.1.1.102; 3-dehydrosphinganine reductase [EC:1.1.1.102]
K04709	K04709		K04709	LAG1; Acyl-CoA-dependent ceramide synthase [EC:2.3.1.24]
K04710 UN035930	K04710		K04710	CERS; ceramide synthetase [EC:2.3.1.24]
K04712 UN021492,UN035129,UN051957	K04712 UN021492		K04712	DEGS; sphingolipid delta-4 desaturase [EC:1.14.-.-]
M00067 Cerebroside and sulfatide biosynthesis [PATH:map00600] (1) (1 block missing)		M00067 Cerebroside and sulfatide biosynthesis [PATH:map00600] (1) (1 block missing)	M00067	Cerebroside and sulfatide biosynthesis [PATH:map00600]
K04628 UN017103		K04628 UN017103	K04628	CGT, UGT8; 2-hydroxyacylsphingosine 1-beta-galactosyltransferase [EC:2.4.1.45]
K01019		K01019	K01019	GAL3ST1; galactosylceramide sulfotransferase [EC:2.8.2.11]
M00099 Sphingosine biosynthesis [PATH:map00600] (18) (complete)	M00099 Sphingosine biosynthesis [PATH:map00600] (4) (incomplete)	M00099 Sphingosine biosynthesis [PATH:map00600] (5) (incomplete)	M00099	Sphingosine biosynthesis [PATH:map00600]
K00654 UN001541,UN014263,UN035270	K00654	K00654	K00654	E2.3.1.50; serine palmitoyltransferase [EC:2.3.1.50]
K04708 UN015579,UN030545,UN032984,UN033087,UN033677,UN042139	K04708 UN033677,UN032984,UN033087	K04708	K04708	E1.1.1.102; 3-dehydrosphinganine reductase [EC:1.1.1.102]
K04709	K04709	K04709	K04709	LAG1; Acyl-CoA-dependent ceramide synthase [EC:2.3.1.24]
K04710 UN035930	K04710	K04710	K04710	CERS; ceramide synthetase [EC:2.3.1.24]
K04712 UN021492,UN035129,UN051957	K04712 UN021492	K04712	K04712	DEGS; sphingolipid delta-4 desaturase [EC:1.14.-.-]
K01441	K01441	K01441	K01441	ACER, ASAH3; alkaline ceramidase [EC:3.5.1.23]
K12348	K12348	K12348	K12348	ASAH1; acid ceramidase [EC:3.5.1.23]
K12349 UN015555,UN017707,UN025654,UN037189,UN051406	K12349	K12349 UN015555,UN051406,UN025654,UN017707,UN037189	K12349	ASAH2; neutral ceramidase [EC:3.5.1.23]
M00100 Sphingosine degradation [PATH:map00600] (3) (complete)			M00100	Sphingosine degradation [PATH:map00600]
K04718 UN018602,UN035663			K04718	SPHK; sphingosine kinase [EC:2.7.1.91]
K01634 UN030980			K01634	E4.1.2.27; sphinganine-1-phosphate aldolase [EC:4.1.2.27]
Sugar metabolism	Sugar metabolism	Sugar metabolism	Sugar	metabolism
M00549 Nucleotide sugar biosynthesis, glucose => UDP-glucose [PATH:map00520] (12) (complete)	M00549 Nucleotide sugar biosynthesis, glucose => UDP-glucose [PATH:map00520] (5) (complete)		M00549	Nucleotide sugar biosynthesis, glucose => UDP-glucose [PATH:map00520]
K00844 UN030869,UN033094	K00844 UN033094,UN030869		K00844	HK; hexokinase [EC:2.7.1.1]
K00845	K00845		K00845	glk; glucokinase [EC:2.7.1.2]
K12407	K12407		K12407	GCK; glucokinase [EC:2.7.1.2]
K00886 UN021432,UN035423,UN038405	K00886		K00886	ppgK; polyphosphate glucokinase [EC:2.7.1.63]
K01835 UN000628,UN000729,UN017751,UN022312,UN033810,UN043032	K01835 UN000729,UN022312		K01835	pgm; phosphoglucomutase [EC:5.4.2.2]
K00963 UN033200	K00963 UN033200		K00963	UGP2, galU, galF; UTP--glucose-1-phosphate uridylyltransferase [EC:2.7.7.9]
K00965	K00965		K00965	galT, GALT; UDPglucose--hexose-1-phosphate uridylyltransferase [EC:2.7.7.12]
M00554 Nucleotide sugar biosynthesis, galactose => UDP-galactose [PATH:map00520 map00052] (2) (1 block missing)	M00554 Nucleotide sugar biosynthesis, galactose => UDP-galactose [PATH:map00520 map00052] (1) (1 block missing)		M00554	Nucleotide sugar biosynthesis, galactose => UDP-galactose [PATH:map00520 map00052]
K00849 UN006591,UN030684	K00849 UN030684		K00849	galK; galactokinase [EC:2.7.1.6]
K00965	K00965		K00965	galT, GALT; UDPglucose--hexose-1-phosphate uridylyltransferase [EC:2.7.7.12]
M00565 Trehalose biosynthesis, D-glucose 1P => trehalose [PATH:map00500] (25) (complete)	M00565 Trehalose biosynthesis, D-glucose 1P => trehalose [PATH:map00500] (5) (2 blocks missing)	M00565 Trehalose biosynthesis, D-glucose 1P => trehalose [PATH:map00500] (7) (2 blocks missing)	M00565	Trehalose biosynthesis, D-glucose 1P => trehalose [PATH:map00500]
K00975 UN021368,UN034076,UN034148	K00975 UN034148	K00975	K00975	glgC; glucose-1-phosphate adenylyltransferase [EC:2.7.7.27]
K00703 UN030029,UN037628,UN039324,UN039326	K00703 UN030029,UN039326	K00703	K00703	E2.4.1.21, glgA; starch synthase [EC:2.4.1.21]
K16148	K16148	K16148	K16148	glgA; starch synthase [EC:2.4.1.21]
K00700 UN021116,UN029962,UN039189,UN041631,UN044521	K00700	K00700 UN044521,UN029962,UN021116	K00700	glgB; 1,4-alpha-glucan branching enzyme [EC:2.4.1.18]
K16149	K16149	K16149	K16149	K16149; 1,4-alpha-glucan branching enzyme [EC:2.4.1.18]
K00688 UN000574,UN011002,UN016833,UN031085,UN031458,UN032886,UN034892,UN037689,UN038680	K00688 UN031458,UN037689	K00688 UN011002,UN031085	K00688	E2.4.1.1, glgP, PYG; starch phosphorylase [EC:2.4.1.1]
K16153	K16153	K16153	K16153	K16153; phosphorylase / glycogen(starch) synthase [EC:2.4.1.1 2.4.1.11]
K02438 UN000489,UN042910,UN051462,UN054038	K02438	K02438 UN054038,UN042910	K02438	treX, glgX; glycogen operon protein [EC:3.2.1.-]
K06044	K06044	K06044	K06044	treY, glgY; (1->4)-alpha-D-glucan 1-alpha-D-glucosylmutase [EC:5.4.99.15]
K01236	K01236	K01236	K01236	treZ, glgZ; maltooligosyltrehalose trehalohydrolase [EC:3.2.1.141]
Glycan metabolism	Glycan metabolism	Glycan metabolism	Glycan	metabolism
M00055 N-glycan precursor biosynthesis [PATH:map00510] (23) (complete)	M00055 N-glycan precursor biosynthesis [PATH:map00510] (3) (incomplete)	M00055 N-glycan precursor biosynthesis [PATH:map00510] (5) (incomplete)	M00055	N-glycan precursor biosynthesis [PATH:map00510]
K01001 UN028310,UN030468	K01001	K01001 UN030468	K01001	ALG7; UDP-N-acetylglucosamine--dolichyl-phosphate N-acetylglucosaminephosphotransferase [EC:2.7.8.15]
K07432 UN000072,UN010703	K07432	K07432	K07432	ALG13; beta-1,4-N-acetylglucosaminyltransferase [EC:2.4.1.141]
K07441 UN038799	K07441	K07441	K07441	ALG14; beta-1,4-N-acetylglucosaminyltransferase [EC:2.4.1.141]
K03842 UN021573	K03842	K03842	K03842	ALG1; beta-1,4-mannosyltransferase [EC:2.4.1.142]
K03843 UN017785	K03843	K03843	K03843	ALG2; alpha-1,3/alpha-1,6-mannosyltransferase [EC:2.4.1.132 2.4.1.257]
K03844 UN038434,UN054461	K03844 UN054461,UN038434	K03844	K03844	ALG11; alpha-1,2-mannosyltransferase [EC:2.4.1.131]
K03845 UN008652,UN032488,UN036724,UN037496	K03845	K03845	K03845	ALG3; alpha-1,3-mannosyltransferase [EC:2.4.1.258]
K03846 UN042119	K03846	K03846 UN042119	K03846	ALG9; alpha-1,2-mannosyltransferase [EC:2.4.1.259 2.4.1.261]
K03847 UN035327	K03847	K03847 UN035327	K03847	ALG12; alpha-1,6-mannosyltransferase [EC:2.4.1.260]
K03846 UN042119	K03846	K03846 UN042119
K00729 UN017656,UN028330,UN035960	K00729 UN028330	K00729	K00729	ALG5; dolichyl-phosphate beta-glucosyltransferase [EC:2.4.1.117]
K03848 UN000728,UN028844	K03848	K03848 UN000728	K03848	ALG6; alpha-1,3-glucosyltransferase [EC:2.4.1.267]
K03849 UN034690	K03849	K03849	K03849	ALG8; alpha-1,3-glucosyltransferase [EC:2.4.1.265]
K03850 UN017600	K03850	K03850	K03850	ALG10; alpha-1,2-glucosyltransferase [EC:2.4.1.256]
M00073 N-glycan precursor trimming [PATH:map00510] (9) (complete)		M00073 N-glycan precursor trimming [PATH:map00510] (2) (2 blocks missing)	M00073	N-glycan precursor trimming [PATH:map00510]
K01228 UN042346,UN044129		K01228	K01228	GCS1; mannosyl-oligosaccharide glucosidase [EC:3.2.1.106]
K05546 UN019304,UN024771		K05546	K05546	GANAB; alpha 1,3-glucosidase [EC:3.2.1.84]
K01230 UN019040,UN028563,UN030161,UN032254,UN038072		K01230 UN019040,UN038072	K01230	MAN1; mannosyl-oligosaccharide alpha-1,2-mannosidase [EC:3.2.1.113]
M00074 N-glycan biosynthesis, high-mannose type [PATH:map00510 map00513] (7) (incomplete)		M00074 N-glycan biosynthesis, high-mannose type [PATH:map00510 map00513] (2) (incomplete)	M00074	N-glycan biosynthesis, high-mannose type [PATH:map00510 map00513]
K05546 UN019304,UN024771		K05546	K05546	GANAB; alpha 1,3-glucosidase [EC:3.2.1.84]
K01230 UN019040,UN028563,UN030161,UN032254,UN038072		K01230 UN019040,UN038072	K01230	MAN1; mannosyl-oligosaccharide alpha-1,2-mannosidase [EC:3.2.1.113]
K05528		K05528	K05528	OCH1; alpha 1,6-mannosyltransferase [EC:2.4.1.232]
K05529		K05529	K05529	MNN9; mannan polymerase complexes MNN9 subunit [EC:2.4.1.-]
K05530		K05530	K05530	VAN1; mannan polymerase I complex VAN1 subunit [EC:2.4.1.-]
K05529		K05529
K05531		K05531	K05531	MNN10; mannan polymerase II complex MNN10 subunit [EC:2.4.1.-]
K05532		K05532	K05532	MNN11; mannan polymerase II complex MNN11 subunit [EC:2.4.1.-]
K05533		K05533	K05533	ANP1; mannan polymerase II complex ANP1 subunit [EC:2.4.1.-]
K05534		K05534
K05535		K05535	K05535	MNN2; alpha 1,2-mannosyltransferase [EC:2.4.1.-]
M00075 N-glycan biosynthesis, complex type [PATH:map00510] (10) (incomplete)		M00075 N-glycan biosynthesis, complex type [PATH:map00510] (6) (incomplete)	M00075	N-glycan biosynthesis, complex type [PATH:map00510]
K01231 UN018772,UN033845,UN035246,UN042030		K01231 UN035246,UN042030,UN033845,UN018772	K01231	MAN2; alpha-mannosidase II [EC:3.2.1.114]
K00736 UN030510,UN040380		K00736	K00736	MGAT2; alpha-1,6-mannosyl-glycoprotein beta-1,2-N-acetylglucosaminyltransferase [EC:2.4.1.143]
K00737 UN017051,UN024667		K00737 UN017051	K00737	MGAT3; beta-1,4-mannosyl-glycoprotein beta-1,4-N-acetylglucosaminyltransferase [EC:2.4.1.144]
K00738		K00738	K00738	MGAT4A_B; alpha-1,3-mannosylglycoprotein beta-1,4-N-acetylglucosaminyltransferase A/B [EC:2.4.1.145]
K00744		K00744	K00744	MGAT5; alpha-1,3(6)-mannosylglycoprotein beta-1,6-N-acetyl-glucosaminyltransferase [EC:2.4.1.155]
K09661		K09661	K09661	MGAT5B; mannosyl alpha-1,6-glycoprotein beta-1,6-N-acetyl-glucosaminyltransferase, isozyme B [EC:2.4.1.-]
K13748		K13748	K13748	MGAT4C; alpha-1,3-mannosylglycoprotein beta-1,4-N-acetylglucosaminyltransferase C [EC:2.4.1.201 2.4.1.145]
K00717 UN013372,UN031837		K00717 UN031837	K00717	FUT8; glycoprotein 6-alpha-L-fucosyltransferase [EC:2.4.1.68]
K07966		K07966	K07966	B4GALT1; beta-1,4-galactosyltransferase 1 [EC:2.4.1.22 2.4.1.90 2.4.1.38 2.4.1.-]
K07967		K07967	K07967	B4GALT2; beta-1,4-galactosyltransferase 2 [EC:2.4.1.22 2.4.1.90 2.4.1.38 2.4.1.-]
K07968		K07968	K07968	B4GALT3; beta-1,4-galactosyltransferase 3 [EC:2.4.1.90 2.4.1.38 2.4.1.-]
K00778		K00778	K00778	SIAT1, ST6GAL1; beta-galactoside alpha-2,6-sialyltransferase (sialyltransferase 1) [EC:2.4.99.1]
K00779		K00779	K00779	SIAT2, ST6GAL2; beta-galactoside alpha2,6-sialyltransferase (sialyltransferase 2) [EC:2.4.99.1]
M00065 GPI-anchor biosynthesis, core oligosaccharide [PATH:map00563] (7) (incomplete)		M00065 GPI-anchor biosynthesis, core oligosaccharide [PATH:map00563] (2) (incomplete)	M00065	GPI-anchor biosynthesis, core oligosaccharide [PATH:map00563]
K03857 UN030459,UN040590		K03857 UN040590,UN030459	K03857	PIGA, GPI3; phosphatidylinositol glycan, class A [EC:2.4.1.198]
K03434 UN003610		K03434	K03434	PIGL; N-acetylglucosaminylphosphatidylinositol deacetylase [EC:3.5.1.89]
K05283		K05283	K05283	PIGW; phosphatidylinositol glycan, class W [EC:2.3.-.-]
K05284 UN026641,UN042125		K05284	K05284	PIGM; phosphatidylinositol glycan, class M [EC:2.4.1.-]
K05285		K05285	K05285	PIGN; phosphatidylinositol glycan, class N [EC:2.7.-.-]
K07542 UN039492		K07542	K07542	PIGV; phosphatidylinositol glycan, class V [EC:2.4.1.-]
K05286 UN000506		K05286	K05286	PIGB; phosphatidylinositol glycan, class B [EC:2.4.1.-]
K05287		K05287	K05287	PIGF; phosphatidylinositol glycan, class F [EC:2.7.-.-]
Terpenoid backbone biosynthesis	Terpenoid backbone biosynthesis	Terpenoid backbone biosynthesis	Terpen	oid backbone biosynthesis
M00095 C5 isoprenoid biosynthesis, mevalonate pathway [PATH:map00900] (12) (complete)		M00095 C5 isoprenoid biosynthesis, mevalonate pathway [PATH:map00900] (4) (incomplete)	M00095	C5 isoprenoid biosynthesis, mevalonate pathway [PATH:map00900]
K00626 UN001165,UN020595,UN027166,UN037575		K00626 UN020595	K00626	E2.3.1.9, atoB; acetyl-CoA C-acetyltransferase [EC:2.3.1.9]
K01641 UN041049		K01641	K01641	E2.3.3.10; hydroxymethylglutaryl-CoA synthase [EC:2.3.3.10]
K00021 UN005426		K00021 UN005426	K00021	E1.1.1.34; hydroxymethylglutaryl-CoA reductase (NADPH) [EC:1.1.1.34]
K00869 UN031309,UN043888		K00869 UN031309	K00869	E2.7.1.36, MVK, mvaK1; mevalonate kinase [EC:2.7.1.36]
K00938 UN029421		K00938	K00938	E2.7.4.2, mvaK2; phosphomevalonate kinase [EC:2.7.4.2]
K13273		K13273	K13273	PMVK; phosphomevalonate kinase [EC:2.7.4.2]
K01597 UN017679,UN028396		K01597 UN017679	K01597	MVD, mvaD; diphosphomevalonate decarboxylase [EC:4.1.1.33]
K01823 UN023560		K01823	K01823	idi, IDI; isopentenyl-diphosphate delta-isomerase [EC:5.3.3.2]
M00096 C5 isoprenoid biosynthesis, non-mevalonate pathway [PATH:map00900] (15) (complete)			M00096	C5 isoprenoid biosynthesis, non-mevalonate pathway [PATH:map00900]
K01662 UN037178,UN039595			K01662	dxs; 1-deoxy-D-xylulose-5-phosphate synthase [EC:2.2.1.7]
K00099 UN033018			K00099	dxr; 1-deoxy-D-xylulose-5-phosphate reductoisomerase [EC:1.1.1.267]
K00991 UN026658,UN043130			K00991	ispD; 2-C-methyl-D-erythritol 4-phosphate cytidylyltransferase [EC:2.7.7.60]
K12506			K12506	ispDF; 2-C-methyl-D-erythritol 4-phosphate cytidylyltransferase / 2-C-methyl-D-erythritol 2,4-cyclodiphosphate synthase [EC:2.7.7.60 4.6.1.12]
K00919 UN032555,UN054412			K00919	ispE; 4-diphosphocytidyl-2-C-methyl-D-erythritol kinase [EC:2.7.1.148]
K01770 UN026468,UN028535,UN028683			K01770	ispF; 2-C-methyl-D-erythritol 2,4-cyclodiphosphate synthase [EC:4.6.1.12]
K12506			K03526	E1.17.7.1, gcpE, ispG; (E)-4-hydroxy-3-methylbut-2-enyl-diphosphate synthase [EC:1.17.7.1]
K03526 UN032291,UN037061			K03527	E1.17.1.2, lytB, ispH; 4-hydroxy-3-methylbut-2-enyl diphosphate reductase [EC:1.17.1.2]
K03527 UN034567,UN037944			K01823	idi, IDI; isopentenyl-diphosphate delta-isomerase [EC:5.3.3.2]
K01823 UN023560			M00364	C10-C20 isoprenoid biosynthesis, bacteria [PATH:map00900]
M00366 C10-C20 isoprenoid biosynthesis, plants [PATH:map00900] (4) (complete)			M00366	C10-C20 isoprenoid biosynthesis, plants [PATH:map00900]
K01823 UN023560			K01823	idi, IDI; isopentenyl-diphosphate delta-isomerase [EC:5.3.3.2]
K14066 UN026656			K14066	GPS; geranyl diphosphate synthase [EC:2.5.1.1]
K00787 UN036726			K00787	FDPS; farnesyl diphosphate synthase [EC:2.5.1.1 2.5.1.10]
K13789 UN020231			K13789	GGPS; geranylgeranyl diphosphate synthase, type II [EC:2.5.1.1 2.5.1.10 2.5.1.29]
Sterol biosynthesis	Sterol biosynthesis	Sterol biosynthesis	Sterol	biosynthesis
M00101 Cholesterol biosynthesis, squalene 2,3-epoxide => cholesterol [PATH:map00100] (19) (incomplete)	M00101 Cholesterol biosynthesis, squalene 2,3-epoxide => cholesterol [PATH:map00100] (2) (incomplete)	M00101 Cholesterol biosynthesis, squalene 2,3-epoxide => cholesterol [PATH:map00100] (4) (incomplete)	M00101	Cholesterol biosynthesis, squalene 2,3-epoxide => cholesterol [PATH:map00100]
K01852	K01852	K01852	K01852	E5.4.99.7, LSS, ERG7; lanosterol synthase [EC:5.4.99.7]
K05917 UN000496,UN038904,UN039038	K05917	K05917 UN038904	K05917	CYP51; cytochrome P450, family 51 (sterol 14-demethylase) [EC:1.14.13.70]
K00222 UN034876,UN040407,UN041811	K00222	K00222 UN041811	K00222	E1.3.1.70, TM7SF2, ERG24; delta14-sterol reductase [EC:1.3.1.70]
K07750	K07750	K07750	K07750	E1.14.13.72, SC4MOL, ERG25; methylsterol monooxygenase [EC:1.14.13.72]
K07748 UN013503,UN019059,UN036513,UN040575,UN040754	K07748 UN036513	K07748 UN019059	K07748	E1.1.1.170, NSDHL, ERG26; sterol-4alpha-carboxylate 3-dehydrogenase (decarboxylating) [EC:1.1.1.170]
K09827	K09827	K09827	K09827	ERG27; 3-keto steroid reductase [EC:1.1.1.270]
K13373	K13373	K13373	K13373	HSD17B7; 17beta-estradiol 17-dehydrogenase / 3beta-hydroxysteroid 3-dehydrogenase [EC:1.1.1.62 1.1.1.270]
K09828 UN022416	K09828	K09828	K09828	DHCR24; delta24-sterol reductase [EC:1.3.1.72]
K01824 UN022059,UN042858,UN043081	K01824	K01824 UN022059	K01824	EBP; cholestenol delta-isomerase [EC:5.3.3.5]
K00227 UN016128,UN026918	K00227 UN026918	K00227	K00227	SC5DL, ERG3; lathosterol oxidase [EC:1.14.21.6]
K00213 UN027115,UN043149	K00213	K00213	K00213	DHCR7; 7-dehydrocholesterol reductase [EC:1.3.1.21]
M00102 Ergocalciferol biosynthesis [PATH:map00100] (3) (incomplete)	M00102 Ergocalciferol biosynthesis [PATH:map00100] (1) (incomplete)		M00102	Ergocalciferol biosynthesis [PATH:map00100]
K00559 UN036868	K00559		K00559	E2.1.1.41, SMT1, ERG6; sterol 24-C-methyltransferase [EC:2.1.1.41]
K09829	K09829		K09829	ERG2; C-8 sterol isomerase [EC:5.-.-.-]
K00227 UN016128,UN026918	K00227 UN026918		K00227	SC5DL, ERG3; lathosterol oxidase [EC:1.14.21.6]
K09831	K09831		K09831	ERG5; C-22 sterol desaturase [EC:1.14.14.-]
K00223	K00223		K00223	ERG4; delta24(24(1))-sterol reductase [EC:1.3.1.71]
M00103 Cholecalciferol biosynthesis [PATH:map00100] (1) (1 block missing)			M00103	Cholecalciferol biosynthesis [PATH:map00100]
K07419			K07419	CYP2R1; cytochrome P450, family 2, subfamily R, polypeptide 1 (vitamin D 25-hydroxylase) [EC:1.14.13.159]
K07438 UN032753			K07438	CYP27B; cytochrome P450, family 27, subfamily B (25-hydroxyvitamin D3 1alpha-hydroxylase) [EC:1.14.13.13]
Other terpenoid biosynthesis	Other terpenoid biosynthesis	Other terpenoid biosynthesis	Other	terpenoid biosynthesis
M00097 beta-Carotene biosynthesis, GGAP => beta-carotene [PATH:map00906] (9) (complete)	M00097 beta-Carotene biosynthesis, GGAP => beta-carotene [PATH:map00906] (1) (incomplete)		M00097	beta-Carotene biosynthesis, GGAP => beta-carotene [PATH:map00906]
K02291 UN054138	K02291		K02291	crtB; phytoene synthase [EC:2.5.1.32]
K02293 UN033674,UN041381	K02293		K02293	PDS, crtP; 15-cis-phytoene desaturase [EC:1.3.5.5]
K15744 UN033854	K15744		K15744	Z-ISO; zeta-carotene isomerase [EC:5.2.1.12]
K00514 UN039371	K00514		K00514	ZDS, crtQ; zeta-carotene desaturase [EC:1.3.5.6]
K09835 UN039413	K09835		K09835	crtISO, crtH; prolycopene isomerase [EC:5.2.1.13]
K06443 UN017702,UN024464,UN031354	K06443 UN024464		K06443	lcyB, crtL1, crtY; lycopene beta-cyclase [EC:5.5.1.19]
M00372 Abscisic acid biosynthesis, beta-carotene => abscisic acid [PATH:map00906] (9) (incomplete)	M00372 Abscisic acid biosynthesis, beta-carotene => abscisic acid [PATH:map00906] (2) (incomplete)		M00372	Abscisic acid biosynthesis, beta-carotene => abscisic acid [PATH:map00906]
K15746 UN026426	K15746 UN026426		K15746	crtZ; beta-carotene 3-hydroxylase [EC:1.14.13.129]
K15747 UN015998	K15747		K15747	LUT5, CYP97A3; cytochrome P450, family 97, subfamily A (beta-ring hydroxylase) [EC:1.14.-.-]
K09838 UN022208,UN024939,UN030055,UN036119,UN038423,UN039336	K09838 UN022208		K09838	ZEP, ABA1; zeaxanthin epoxidase [EC:1.14.13.90]
K14594	K14594		K14594	NSY; neoxanthin synthase [EC:5.3.99.9]
K09840 UN029955	K09840		K09840	NCED; 9-cis-epoxycarotenoid dioxygenase [EC:1.13.11.51]
K09841	K09841		K09841	ABA2; xanthoxin dehydrogenase [EC:1.1.1.288]
K09842	K09842		K09842	AAO3; abscisic-aldehyde oxidase [EC:1.2.3.14]
Nucleotide and amino acid metabolism	Nucleotide and amino acid metabolism	Nucleotide and amino acid metabolism	Nucleo	tide and amino acid metabolism
Purine metabolism	Purine metabolism	Purine metabolism	Purine	metabolism
M00048 Inosine monophosphate biosynthesis, PRPP + glutamine => IMP [PATH:map00230] (17) (complete)		M00048 Inosine monophosphate biosynthesis, PRPP + glutamine => IMP [PATH:map00230] (3) (incomplete)	M00048	Inosine monophosphate biosynthesis, PRPP + glutamine => IMP [PATH:map00230]
K00764 UN034611		K00764	K00764	purF, PPAT; amidophosphoribosyltransferase [EC:2.4.2.14]
K01945 UN029933		K01945	K01945	purD; phosphoribosylamine--glycine ligase [EC:6.3.4.13]
K11787		K11787	K11787	GART; phosphoribosylamine--glycine ligase / phosphoribosylglycinamide formyltransferase / phosphoribosylformylglycinamidine cyclo-ligase [EC:6.3.4.13 2.1.2.2 6.3.3.1]
K11788		K11788	K11788	ADE5; phosphoribosylamine--glycine ligase / phosphoribosylformylglycinamidine cyclo-ligase [EC:6.3.4.13 6.3.3.1]
K13713		K13713	K13713	purCD; fusion protein PurCD [EC:6.3.2.6 6.3.4.13]
K00601 UN021647		K00601	K00601	E2.1.2.2; phosphoribosylglycinamide formyltransferase [EC:2.1.2.2]
K11175		K11175	K11175	purN; phosphoribosylglycinamide formyltransferase 1 [EC:2.1.2.2]
K08289		K08289	K08289	purT; phosphoribosylglycinamide formyltransferase 2 [EC:2.1.2.2]
K11787		K11787
K01952 UN000331,UN022941,UN038017		K01952 UN022941	K01952	purL, PFAS; phosphoribosylformylglycinamidine synthase [EC:6.3.5.3]
K01933 UN036393,UN053970		K01933	K01933	purM; phosphoribosylformylglycinamidine cyclo-ligase [EC:6.3.3.1]
K11787		K11787
K11788		K11788
K01587		K01587	K01587	PAICS; phosphoribosylaminoimidazole carboxylase / phosphoribosylaminoimidazole-succinocarboxamide synthase [EC:4.1.1.21 6.3.2.6]
K11808 UN021247		K11808	K11808	ADE2; phosphoribosylaminoimidazole carboxylase [EC:4.1.1.21]
K01589		K01589	K01589	purK; 5-(carboxyamino)imidazole ribonucleotide synthase [EC:6.3.4.18]
K01588 UN036020		K01588	K01588	purE; 5-(carboxyamino)imidazole ribonucleotide mutase [EC:5.4.99.18]
K01923 UN030209,UN034634,UN042862		K01923 UN030209	K01923	purC; phosphoribosylaminoimidazole-succinocarboxamide synthase [EC:6.3.2.6]
K01587		K01587
K13713		K13713
K01756 UN014575,UN028688,UN031797		K01756 UN014575	K01756	purB, ADSL; adenylosuccinate lyase [EC:4.3.2.2]
K00602 UN006517		K00602	K00602	purH; phosphoribosylaminoimidazolecarboxamide formyltransferase / IMP cyclohydrolase [EC:2.1.2.3 3.5.4.10]
K01492		K01492	K01492	E2.1.2.3; phosphoribosylaminoimidazolecarboxamide formyltransferase [EC:2.1.2.3]
K06863		K06863	K06863	purP; 5-formaminoimidazole-4-carboxamide-1-(beta)-D-ribofuranosyl 5'-monophosphate synthetase [EC:6.3.4.-]
K11176		K11176	K11176	purO; IMP cyclohydrolase [EC:3.5.4.10]
M00049 Adenine ribonucleotide biosynthesis, IMP => ADP,ATP [PATH:map00230] (27) (complete)	M00049 Adenine ribonucleotide biosynthesis, IMP => ADP,ATP [PATH:map00230] (3) (2 blocks missing)	M00049 Adenine ribonucleotide biosynthesis, IMP => ADP,ATP [PATH:map00230] (3) (2 blocks missing)	M00049	Adenine ribonucleotide biosynthesis, IMP => ADP,ATP [PATH:map00230]
K01939 UN020016,UN027447,UN035021	K01939	K01939	K01939	E6.3.4.4, purA; adenylosuccinate synthase [EC:6.3.4.4]
K01756 UN014575,UN028688,UN031797	K01756	K01756 UN014575	K01756	purB, ADSL; adenylosuccinate lyase [EC:4.3.2.2]
K00939 UN010469,UN020172,UN033891,UN037055,UN038068	K00939 UN037055	K00939	K00939	E2.7.4.3, adk; adenylate kinase [EC:2.7.4.3]
K00940 UN021737,UN023326,UN025448,UN028525,UN031185,UN034741,UN036790,UN038201	K00940 UN028525,UN038201	K00940	K00940	E2.7.4.6, ndk; nucleoside-diphosphate kinase [EC:2.7.4.6]
K00873 UN000009,UN018743,UN019145,UN027350,UN036740,UN037166,UN037979,UN042071	K00873	K00873 UN019145,UN037979	K00873	PK, pyk; pyruvate kinase [EC:2.7.1.40]
K12406	K12406	K12406	K12406	PKLR; pyruvate kinase isozymes R/L [EC:2.7.1.40]
M00050 Guanine ribonucleotide biosynthesis IMP => GDP,GTP [PATH:map00230] (23) (complete)	M00050 Guanine ribonucleotide biosynthesis IMP => GDP,GTP [PATH:map00230] (4) (2 blocks missing)	M00050 Guanine ribonucleotide biosynthesis IMP => GDP,GTP [PATH:map00230] (5) (1 block missing)	M00050	Guanine ribonucleotide biosynthesis IMP => GDP,GTP [PATH:map00230]
K00088 UN008160,UN020021,UN035683	K00088 UN020021,UN008160	K00088	K00088	guaB; IMP dehydrogenase [EC:1.1.1.205]
K01951 UN035926,UN039747,UN043067	K01951	K01951 UN035926,UN039747	K01951	E6.3.5.2, guaA; GMP synthase (glutamine-hydrolysing) [EC:6.3.5.2]
K00942 UN023742	K00942	K00942 UN023742	K00942	E2.7.4.8, gmk; guanylate kinase [EC:2.7.4.8]
K00940 UN021737,UN023326,UN025448,UN028525,UN031185,UN034741,UN036790,UN038201	K00940 UN028525,UN038201	K00940	K00940	E2.7.4.6, ndk; nucleoside-diphosphate kinase [EC:2.7.4.6]
K00873 UN000009,UN018743,UN019145,UN027350,UN036740,UN037166,UN037979,UN042071	K00873	K00873 UN019145,UN037979	K00873	PK, pyk; pyruvate kinase [EC:2.7.1.40]
K12406	K12406	K12406	K12406	PKLR; pyruvate kinase isozymes R/L [EC:2.7.1.40]
M00546 Purine degradation, xanthine => urea [PATH:map00230] (7) (2 blocks missing)	M00546 Purine degradation, xanthine => urea [PATH:map00230] (1) (incomplete)	M00546 Purine degradation, xanthine => urea [PATH:map00230] (1) (incomplete)	M00546	Purine degradation, xanthine => urea [PATH:map00230]
K00106 UN018758,UN020089,UN025744,UN030342	K00106	K00106 UN018758	K00106	XDH; xanthine dehydrogenase/oxidase [EC:1.17.1.4 1.17.3.2]
K00087	K00087	K00087	K00087	ygeS, xdhA; xanthine dehydrogenase molybdenum-binding subunit [EC:1.17.1.4]
K13479	K13479	K13479	K13479	ygeT, xdhB; xanthine dehydrogenase FAD-binding subunit [EC:1.17.1.4]
K13480	K13480	K13480	K13480	ygeU, xdhC; xanthine dehydrogenase iron-sulfur-binding subunit
K13481	K13481	K13481	K13481	xdhA; xanthine dehydrogenase small subunit [EC:1.17.1.4]
K13482	K13482	K13482	K13482	xdhB; xanthine dehydrogenase large subunit [EC:1.17.1.4]
K11177	K11177	K11177	K11177	yagR; xanthine dehydrogenase YagR molybdenum-binding subunit [EC:1.17.1.4]
K11178	K11178	K11178	K11178	yagS; xanthine dehydrogenase YagS FAD-binding subunit [EC:1.17.1.4]
K13483	K13483	K13483	K13483	yagT; xanthine dehydrogenase YagT iron-sulfur-binding subunit
K00365 UN001112	K00365	K00365	K00365	E1.7.3.3; urate oxidase [EC:1.7.3.3]
K16838	K16838	K16838	K16838	pucL; urate oxidase / 2-oxo-4-hydroxy-4-carboxy-5-ureidoimidazoline decarboxylase [EC:1.7.3.3 4.1.1.-]
K16839	K16839	K16839	K16839	hpxO; FAD-dependent urate hydroxylase [EC:1.14.13.113]
K13484	K13484	K13484	K13484	TTHL; 5-hydroxyisourate hydrolase / 2-oxo-4-hydroxy-4-carboxy-5-ureidoimidazoline decarboxylase [EC:3.5.2.17 4.1.1.-]
K07127 UN034766	K07127 UN034766	K07127	K07127	uraH, pucM, hiuH; 5-hydroxyisourate hydrolase [EC:3.5.2.17]
K13485	K13485	K13485	K13485	PRHOXNB, URAD; 2-oxo-4-hydroxy-4-carboxy-5-ureidoimidazoline decarboxylase [EC:4.1.1.-]
K16838	K16838	K16838
K16840	K16840	K16840	K16840	hpxQ; 2-oxo-4-hydroxy-4-carboxy-5-ureidoimidazoline decarboxylase [EC:4.1.1.-]
K01466 UN035693	K01466	K01466	K01466	allB; allantoinase [EC:3.5.2.5]
K16842	K16842	K16842	K16842	hpxB; allantoinase [EC:3.5.2.5]
K01477	K01477	K01477	K01477	alc, ALLC; allantoicase [EC:3.5.3.4]
Pyrimidine metabolism	Pyrimidine metabolism	Pyrimidine metabolism	Pyrimi	dine metabolism
M00051 Uridine monophosphate biosynthesis, glutamine (+ PRPP) => UMP [PATH:map00240] (13) (1 block missing)	M00052 Pyrimidine ribonucleotide biosynthesis, UMP => UDP/UTP,CDP/CTP [PATH:map00240] (2) (2 blocks missing)	M00051 Uridine monophosphate biosynthesis, glutamine (+ PRPP) => UMP [PATH:map00240] (1) (incomplete)	M00051	Uridine monophosphate biosynthesis, glutamine (+ PRPP) => UMP [PATH:map00240]
K11540	K13800	K11540	K11540	CAD; carbamoyl-phosphate synthase / aspartate carbamoyltransferase / dihydroorotase [EC:6.3.5.5 2.1.3.2 3.5.2.3]
K11541	K13809	K11541	K11541	URA2; carbamoyl-phosphate synthase / aspartate carbamoyltransferase [EC:6.3.5.5 2.1.3.2]
K01465 UN027045	K00945	K01465	K01465	URA4, pyrC; dihydroorotase [EC:3.5.2.3]
K01954	K13799	K01954	K01954	K01954; carbamoyl-phosphate synthase [EC:6.3.5.5]
K01955 UN026523,UN034792	K00940 UN028525,UN038201	K01955 UN026523	K01955	carB, CPA2; carbamoyl-phosphate synthase large subunit [EC:6.3.5.5]
K01956 UN018230,UN051917,UN052002	K01937	K01956	K01956	carA, CPA1; carbamoyl-phosphate synthase small subunit [EC:6.3.5.5]
K00609 UN028123,UN040522		K00609	K00609	pyrB, PYR2; aspartate carbamoyltransferase catalytic subunit [EC:2.1.3.2]
K00610		K00610	K00610	pyrI; aspartate carbamoyltransferase regulatory subunit
K00608		K00608	K00608	pyrBI; aspartate carbamoyltransferase [EC:2.1.3.2]
K01465 UN027045		K01465
K00226		K00226	K00226	pyrD; dihydroorotate dehydrogenase (fumarate) [EC:1.3.98.1]
K00254 UN029160		K00254	K00254	DHODH; dihydroorotate dehydrogenase [EC:1.3.5.2]
K13421 UN015684,UN018774,UN041099		K13421	K13421	UMPS; uridine monophosphate synthetase [EC:2.4.2.10 4.1.1.23]
K00762		K00762	K00762	pyrE; orotate phosphoribosyltransferase [EC:2.4.2.10]
K01591		K01591	K01591	pyrF; orotidine-5'-phosphate decarboxylase [EC:4.1.1.23]
M00052 Pyrimidine ribonucleotide biosynthesis, UMP => UDP/UTP,CDP/CTP [PATH:map00240] (12) (complete)		M00052 Pyrimidine ribonucleotide biosynthesis, UMP => UDP/UTP,CDP/CTP [PATH:map00240] (1) (2 blocks missing)	M00052	Pyrimidine ribonucleotide biosynthesis, UMP => UDP/UTP,CDP/CTP [PATH:map00240]
K13800 UN034801		K13800	K13800	CMPK1, UMPK; UMP-CMP kinase [EC:2.7.4.- 2.7.4.14]
K13809		K13809	K13809	CMPK2; UMP-CMP kinase 2, mitochondrial [EC:2.7.4.14]
K00945		K00945	K00945	cmk; cytidylate kinase [EC:2.7.4.14]
K13799		K13799	K13799	panC-cmk; pantoate ligase / cytidylate kinase [EC:6.3.2.1 2.7.4.14]
K00940 UN021737,UN023326,UN025448,UN028525,UN031185,UN034741,UN036790,UN038201		K00940	K00940	E2.7.4.6, ndk; nucleoside-diphosphate kinase [EC:2.7.4.6]
K01937 UN037045,UN038848,UN043301		K01937 UN043301	K01937	E6.3.4.2, pyrG; CTP synthase [EC:6.3.4.2]
M00053 Pyrimidine deoxyribonuleotide biosynthesis, CDP/CTP => dCDP/dCTP,dTDP/dTTP [PATH:map00240] (29) (2 blocks missing)	M00053 Pyrimidine deoxyribonuleotide biosynthesis, CDP/CTP => dCDP/dCTP,dTDP/dTTP [PATH:map00240] (7) (incomplete)	M00053 Pyrimidine deoxyribonuleotide biosynthesis, CDP/CTP => dCDP/dCTP,dTDP/dTTP [PATH:map00240] (1) (incomplete)	M00053	Pyrimidine deoxyribonuleotide biosynthesis, CDP/CTP => dCDP/dCTP,dTDP/dTTP [PATH:map00240]
K00524	K00524	K00524	K00524	nrdJ; ribonucleotide reductase, class II [EC:1.17.4.1]
K00525	K00525	K00525	K00525	E1.17.4.1A, nrdA, nrdE; ribonucleoside-diphosphate reductase alpha chain [EC:1.17.4.1]
K00526	K00526	K00526	K00526	E1.17.4.1B, nrdB, nrdF; ribonucleoside-diphosphate reductase beta chain [EC:1.17.4.1]
K10807 UN034796	K10807	K10807	K10807	RRM1; ribonucleoside-diphosphate reductase subunit M1 [EC:1.17.4.1]
K10808 UN021673	K10808	K10808	K10808	RRM2; ribonucleoside-diphosphate reductase subunit M2 [EC:1.17.4.1]
K00940 UN021737,UN023326,UN025448,UN028525,UN031185,UN034741,UN036790,UN038201	K00940 UN028525,UN038201	K00940	K00940	E2.7.4.6, ndk; nucleoside-diphosphate kinase [EC:2.7.4.6]
K00527	K00527	K00527	K00527	nrdD; ribonucleoside-triphosphate reductase [EC:1.17.4.2]
K01494	K01494	K01494	K01494	E3.5.4.13, dcd; dCTP deaminase [EC:3.5.4.13]
K01520 UN013158,UN015719,UN020501,UN026478,UN028659,UN031054,UN036690,UN052220	K01520 UN028659,UN052220,UN013158	K01520	K01520	dut, DUT; dUTP pyrophosphatase [EC:3.6.1.23]
K00560 UN000243,UN043385	K00560	K00560 UN000243	K00560	thyA, TYMS; thymidylate synthase [EC:2.1.1.45]
K13998	K13998	K13998	K13998	DHFR-TS; dihydrofolate reductase / thymidylate synthase [EC:1.5.1.3 2.1.1.45]
K00943 UN040208	K00943	K00943	K00943	E2.7.4.9, tmk; dTMP kinase [EC:2.7.4.9]
K00940 UN021737,UN023326,UN025448,UN028525,UN031185,UN034741,UN036790,UN038201	K00940 UN028525,UN038201	K00940
M00046 Pyrimidine degradation, uracil => beta-alanine, thymine => 3-aminoisobutanoate [PATH:map00240] (7) (complete)		M00046 Pyrimidine degradation, uracil => beta-alanine, thymine => 3-aminoisobutanoate [PATH:map00240] (2) (2 blocks missing)	M00046	Pyrimidine degradation, uracil => beta-alanine, thymine => 3-aminoisobutanoate [PATH:map00240]
K00207 UN033615,UN039370		K00207	K00207	E1.3.1.2, DPYD; dihydropyrimidine dehydrogenase (NADP+) [EC:1.3.1.2]
K01464 UN012471,UN021911,UN031313,UN036398		K01464 UN036398,UN021911	K01464	E3.5.2.2, DPYS; dihydropyrimidinase [EC:3.5.2.2]
K01431 UN032933		K01431	K01431	E3.5.1.6; beta-ureidopropionase [EC:3.5.1.6]
Serine and threonine metabolism	Serine and threonine metabolism	Serine and threonine metabolism	Serine	and threonine metabolism
M00020 Serine biosynthesis, glycerate-3P => serine [PATH:map01200 map01230 map00260] (3) (complete)			M00020	Serine biosynthesis, glycerate-3P => serine [PATH:map01200 map01230 map00260]
K00058 UN026271			K00058	serA, PHGDH; D-3-phosphoglycerate dehydrogenase [EC:1.1.1.95]
K00831 UN037981			K00831	serC, PSAT1; phosphoserine aminotransferase [EC:2.6.1.52]
K01079 UN035320			K01079	serB, PSPH; phosphoserine phosphatase [EC:3.1.3.3]
M00018 Threonine biosynthesis, aspartate => homoserine => threonine [PATH:map01230 map00260] (12) (complete)	M00018 Threonine biosynthesis, aspartate => homoserine => threonine [PATH:map01230 map00260] (1) (incomplete)	M00018 Threonine biosynthesis, aspartate => homoserine => threonine [PATH:map01230 map00260] (3) (incomplete)	M00018	Threonine biosynthesis, aspartate => homoserine => threonine [PATH:map01230 map00260]
K00928 UN002780,UN026123,UN042132	K00928	K00928 UN042132	K00928	lysC; aspartate kinase [EC:2.7.2.4]
K12524 UN000465,UN014656	K12524	K12524 UN014656	K12524	thrA; bifunctional aspartokinase / homoserine dehydrogenase 1 [EC:2.7.2.4 1.1.1.3]
K12525	K12525	K12525	K12525	metL; bifunctional aspartokinase / homoserine dehydrogenase 2 [EC:2.7.2.4 1.1.1.3]
K12526	K12526	K12526	K12526	lysAC; bifunctional diaminopimelate decarboxylase / aspartate kinase [EC:4.1.1.20 2.7.2.4]
K00133 UN038800,UN043220	K00133	K00133	K00133	asd; aspartate-semialdehyde dehydrogenase [EC:1.2.1.11]
K00003	K00003	K00003	K00003	E1.1.1.3; homoserine dehydrogenase [EC:1.1.1.3]
K12524 UN000465,UN014656	K12524	K12524 UN014656
K12525	K12525	K12525
K00872 UN001264,UN041071	K00872	K00872	K00872	thrB1; homoserine kinase [EC:2.7.1.39]
K02204	K02204	K02204	K02204	thrB2; homoserine kinase type II [EC:2.7.1.39]
K02203	K02203	K02203	K02203	thrH; phosphoserine / homoserine phosphotransferase [EC:3.1.3.3 2.7.1.39]
K01733 UN022502	K01733 UN022502	K01733	K01733	thrC; threonine synthase [EC:4.2.3.1]
M00555 Betaine biosynthesis, choline => betaine [PATH:map00260] (2) (complete)			M00555	Betaine biosynthesis, choline => betaine [PATH:map00260]
K17755
K00108 UN040722			K00108	E1.1.99.1, betA, CHDH; choline dehydrogenase [EC:1.1.99.1]
K11440			K11440	gbsB; choline dehydrogenase [EC:1.1.1.1]
K00130 UN035168			K00130	betB, gbsA; betaine-aldehyde dehydrogenase [EC:1.2.1.8]
Cysteine and methionine metabolism	Cysteine and methionine metabolism	Cysteine and methionine metabolism	Cystei	ne and methionine metabolism
M00021 Cysteine biosynthesis, serine => cysteine [PATH:map01200 map01230 map00270] (9) (complete)	M00021 Cysteine biosynthesis, serine => cysteine [PATH:map01200 map01230 map00270] (1) (1 block missing)	M00021 Cysteine biosynthesis, serine => cysteine [PATH:map01200 map01230 map00270] (1) (1 block missing)	M00021	Cysteine biosynthesis, serine => cysteine [PATH:map01200 map01230 map00270]
K00640 UN022269,UN030175,UN037525	K00640	K00640	K00640	cysE; serine O-acetyltransferase [EC:2.3.1.30]
K01738 UN016787,UN019620,UN021310,UN021740,UN035033,UN037498	K01738 UN035033	K01738 UN016787	K01738	cysK; cysteine synthase A [EC:2.5.1.47]
K12339	K12339	K12339	K12339	cysM; cysteine synthase B [EC:2.5.1.47]
K13034	K13034	K13034	K13034	ATCYSC1; L-3-cyanoalanine synthase/ cysteine synthase [EC:2.5.1.47 4.4.1.9]
K17069	K17069	K17069	K17069	MET17; O-acetylhomoserine/O-acetylserine sulfhydrylase [EC:2.5.1.49 2.5.1.47]
M00338 Cysteine biosynthesis, homocysteine + serine => cysteine [PATH:map01230 map00270] (2) (1 block missing)			M00338	Cysteine biosynthesis, homocysteine + serine => cysteine [PATH:map01230 map00270]
K01697			K01697	E4.2.1.22, CBS; cystathionine beta-synthase [EC:4.2.1.22]
K10150			K10150	cysO; cysteine synthase / O-phosphoserine sulfhydrylase / cystathionine beta-synthase [EC:2.5.1.47 2.5.1.65 4.2.1.22]
K01758 UN035907,UN038123			K01758	E4.4.1.1; cystathionine gamma-lyase [EC:4.4.1.1]
M00017 Methionine biosynthesis, apartate => homoserine => methionine [PATH:map01230 map00270] (16) (1 block missing)		M00017 Methionine biosynthesis, apartate => homoserine => methionine [PATH:map01230 map00270] (5) (incomplete)	M00017	Methionine biosynthesis, apartate => homoserine => methionine [PATH:map01230 map00270]
K00928 UN002780,UN026123,UN042132		K00928 UN042132	K00928	lysC; aspartate kinase [EC:2.7.2.4]
K12524 UN000465,UN014656		K12524 UN014656	K12524	thrA; bifunctional aspartokinase / homoserine dehydrogenase 1 [EC:2.7.2.4 1.1.1.3]
K12525		K12525	K12525	metL; bifunctional aspartokinase / homoserine dehydrogenase 2 [EC:2.7.2.4 1.1.1.3]
K12526		K12526	K12526	lysAC; bifunctional diaminopimelate decarboxylase / aspartate kinase [EC:4.1.1.20 2.7.2.4]
K00133 UN038800,UN043220		K00133	K00133	asd; aspartate-semialdehyde dehydrogenase [EC:1.2.1.11]
K00003		K00003	K00003	E1.1.1.3; homoserine dehydrogenase [EC:1.1.1.3]
K12524 UN000465,UN014656		K12524 UN014656
K12525		K12525
K00651		K00651	K00651	metA; homoserine O-succinyltransferase [EC:2.3.1.46]
K01739 UN019542,UN028628		K01739	K01739	metB; cystathionine gamma-synthase [EC:2.5.1.48]
K01760 UN037543		K01760	K01760	metC; cystathionine beta-lyase [EC:4.4.1.8]
K00548 UN029146		K00548	K00548	metH, MTR; 5-methyltetrahydrofolate--homocysteine methyltransferase [EC:2.1.1.13]
K00549 UN026890,UN032108,UN037768		K00549 UN037768,UN032108	K00549	metE; 5-methyltetrahydropteroyltriglutamate--homocysteine methyltransferase [EC:2.1.1.14]
M00034 Methionine salvage pathway [PATH:map00270] (12) (incomplete)	M00034 Methionine salvage pathway [PATH:map00270] (1) (incomplete)	M00034 Methionine salvage pathway [PATH:map00270] (1) (incomplete)	M00034	Methionine salvage pathway [PATH:map00270]
K00789 UN027957,UN032954	K00789	K00789 UN027957	K00789	metK; S-adenosylmethionine synthetase [EC:2.5.1.6]
K01611	K01611	K01611	K01611	speD, AMD1; S-adenosylmethionine decarboxylase [EC:4.1.1.50]
K00797 UN027983,UN034839	K00797	K00797	K00797	speE, SRM; spermidine synthase [EC:2.5.1.16]
K01243	K01243	K01243	K01243	mtnN, mtn, pfs; S-adenosylhomocysteine/5'-methylthioadenosine nucleosidase [EC:3.2.2.9]
K01244 UN017136,UN038778	K01244 UN038778	K01244	K01244	MTN; 5'-methylthioadenosine nucleosidase [EC:3.2.2.16]
K00899 UN019275,UN025769	K00899	K00899	K00899	mtnK; 5-methylthioribose kinase [EC:2.7.1.100]
K00772	K00772	K00772	K00772	E2.4.2.28, mtaP; 5'-methylthioadenosine phosphorylase [EC:2.4.2.28]
K08963	K08963	K08963	K08963	mtnA; methylthioribose-1-phosphate isomerase [EC:5.3.1.23]
K16054	K16054	K16054	K16054	DEP1; methylthioribulose 1-phosphate dehydratase / enolase-phosphatase E1 [EC:4.2.1.109 3.1.3.77]
K08964 UN036055	K08964	K08964	K08964	mtnB; methylthioribulose-1-phosphate dehydratase [EC:4.2.1.109]
K09880	K09880	K09880	K09880	mtnC, ENOPH1; enolase-phosphatase E1 [EC:3.1.3.77]
K08965	K08965	K08965	K08965	mtnW; 2,3-diketo-5-methylthiopentyl-1-phosphate enolase [EC:5.3.2.5]
K08966	K08966	K08966	K08966	mtnX; 2-hydroxy-3-keto-5-methylthiopentenyl-1-phosphate phosphatase [EC:3.1.3.87]
K08967 UN039134	K08967	K08967	K08967	mtnD, mtnZ, ADI1; 1,2-dihydroxy-3-keto-5-methylthiopentene dioxygenase [EC:1.13.11.53 1.13.11.54]
K00815 UN024114,UN037010	K00815	K00815	K00815	TAT; tyrosine aminotransferase [EC:2.6.1.5]
K08969	K08969	K08969	K08969	mtnE, mtnV; aminotransferase [EC:2.6.1.-]
K00832	K00832	K00832	K00832	tyrB; aromatic-amino-acid transaminase [EC:2.6.1.57]
K00838	K00838	K00838	K00838	ARO8; aromatic amino acid aminotransferase I [EC:2.6.1.57 2.6.1.27 2.6.1.5]
M00035 Methionine degradation [PATH:map00270] (6) (1 block missing)		M00035 Methionine degradation [PATH:map00270] (4) (2 blocks missing)	M00035	Methionine degradation [PATH:map00270]
K00789 UN027957,UN032954		K00789 UN027957	K00789	metK; S-adenosylmethionine synthetase [EC:2.5.1.6]
K00558		K00558	K00558	DNMT1, dcm; DNA (cytosine-5)-methyltransferase 1 [EC:2.1.1.37]
K17398 UN025011,UN032427		K17398 UN032427,UN025011	K17398	DNMT3A; DNA (cytosine-5)-methyltransferase 3A [EC:2.1.1.37]
K17399 UN026243		K17399 UN026243	K17399	DNMT3B; DNA (cytosine-5)-methyltransferase 3B [EC:2.1.1.37]
K01251 UN033645		K01251	K01251	E3.3.1.1, ahcY; adenosylhomocysteinase [EC:3.3.1.1]
K01697		K01697	K01697	E4.2.1.22, CBS; cystathionine beta-synthase [EC:4.2.1.22]
K10150		K10150	K10150	cysO; cysteine synthase / O-phosphoserine sulfhydrylase / cystathionine beta-synthase [EC:2.5.1.47 2.5.1.65 4.2.1.22]
M00368 Ethylene biosynthesis, methionine => ethylene [PATH:map00270] (2) (2 blocks missing)		M00368 Ethylene biosynthesis, methionine => ethylene [PATH:map00270] (1) (2 blocks missing)	M00368	Ethylene biosynthesis, methionine => ethylene [PATH:map00270]
K00789 UN027957,UN032954		K00789 UN027957	K00789	metK; S-adenosylmethionine synthetase [EC:2.5.1.6]
K01762		K01762	K01762	ACS; 1-aminocyclopropane-1-carboxylate synthase [EC:4.4.1.14]
K05933		K05933	K05933	E1.14.17.4; aminocyclopropanecarboxylate oxidase [EC:1.14.17.4]
Branched-chain amino acid metabolism	Branched-chain amino acid metabolism	Branched-chain amino acid metabolism	Branch	ed-chain amino acid metabolism
M00019 Valine/isoleucine biosynthesis, pyruvate => valine / 2-oxobutanoate => isoleucine [PATH:map01210 map01230 map00290] (15) (complete)	M00019 Valine/isoleucine biosynthesis, pyruvate => valine / 2-oxobutanoate => isoleucine [PATH:map01210 map01230 map00290] (2) (incomplete)	M00019 Valine/isoleucine biosynthesis, pyruvate => valine / 2-oxobutanoate => isoleucine [PATH:map01210 map01230 map00290] (2) (incomplete)	M00019	Valine/isoleucine biosynthesis, pyruvate => valine / 2-oxobutanoate => isoleucine [PATH:map01210 map01230 map00290]
K01652 UN000468,UN022318,UN029089,UN036870	K01652 UN029089	K01652	K01652	E2.2.1.6L, ilvB, ilvG, ilvI; acetolactate synthase I/II/III large subunit [EC:2.2.1.6]
K01653 UN025717	K01653	K01653	K01653	E2.2.1.6S, ilvH, ilvN; acetolactate synthase I/III small subunit [EC:2.2.1.6]
K11258	K11258	K11258	K11258	ilvM; acetolactate synthase II small subunit [EC:2.2.1.6]
K00053 UN024906	K00053	K00053	K00053	ilvC; ketol-acid reductoisomerase [EC:1.1.1.86]
K01687 UN000232,UN025306,UN025506	K01687	K01687 UN025506,UN000232	K01687	ilvD; dihydroxy-acid dehydratase [EC:4.2.1.9]
K00826 UN001283,UN034097,UN035086,UN036823,UN038035,UN042080	K00826 UN042080	K00826	K00826	E2.6.1.42, ilvE; branched-chain amino acid aminotransferase [EC:2.6.1.42]
M00535 Isoleucine biosynthesis, pyruvate => 2-oxobutanoate [PATH:map01210 map01230 map00290] (6) (1 block missing)			M00535	Isoleucine biosynthesis, pyruvate => 2-oxobutanoate [PATH:map01210 map01230 map00290]
K09011			K09011	cimA; D-citramalate synthase [EC:2.3.1.182]
K01703 UN022340			K01703	leuC; 3-isopropylmalate/(R)-2-methylmalate dehydratase large subunit [EC:4.2.1.33 4.2.1.35]
K01704 UN021053			K01704	leuD; 3-isopropylmalate/(R)-2-methylmalate dehydratase small subunit [EC:4.2.1.33 4.2.1.35]
K00052 UN031728,UN036327,UN036491,UN038878			K00052	leuB; 3-isopropylmalate dehydrogenase [EC:1.1.1.85]
M00570 Isoleucine biosynthesis, threonine => 2-oxobutanoate => isoleucine [PATH:map01230 map00290] (22) (complete)	M00570 Isoleucine biosynthesis, threonine => 2-oxobutanoate => isoleucine [PATH:map01230 map00290] (2) (incomplete)	M00570 Isoleucine biosynthesis, threonine => 2-oxobutanoate => isoleucine [PATH:map01230 map00290] (3) (incomplete)	M00570	Isoleucine biosynthesis, threonine => 2-oxobutanoate => isoleucine [PATH:map01230 map00290]
K01754 UN002344,UN018381,UN020674,UN029811,UN030452,UN036215,UN054562	K01754	K01754 UN036215	K01754	E4.3.1.19, ilvA, tdcB; threonine dehydratase [EC:4.3.1.19]
K01652 UN000468,UN022318,UN029089,UN036870	K01652 UN029089	K01652	K01652	E2.2.1.6L, ilvB, ilvG, ilvI; acetolactate synthase I/II/III large subunit [EC:2.2.1.6]
K01653 UN025717	K01653	K01653	K01653	E2.2.1.6S, ilvH, ilvN; acetolactate synthase I/III small subunit [EC:2.2.1.6]
K11258	K11258	K11258	K11258	ilvM; acetolactate synthase II small subunit [EC:2.2.1.6]
K00053 UN024906	K00053	K00053	K00053	ilvC; ketol-acid reductoisomerase [EC:1.1.1.86]
K01687 UN000232,UN025306,UN025506	K01687	K01687 UN025506,UN000232	K01687	ilvD; dihydroxy-acid dehydratase [EC:4.2.1.9]
K00826 UN001283,UN034097,UN035086,UN036823,UN038035,UN042080	K00826 UN042080	K00826	K00826	E2.6.1.42, ilvE; branched-chain amino acid aminotransferase [EC:2.6.1.42]
M00432 Leucine biosynthesis, 2-oxoisovalerate => 2-oxoisocaproate [PATH:map01210 map01230 map00290] (10) (complete)		M00432 Leucine biosynthesis, 2-oxoisovalerate => 2-oxoisocaproate [PATH:map01210 map01230 map00290] (1) (2 blocks missing)	M00432	Leucine biosynthesis, 2-oxoisovalerate => 2-oxoisocaproate [PATH:map01210 map01230 map00290]
K01649 UN033495,UN035100,UN035889,UN036864		K01649 UN036864	K01649	leuA; 2-isopropylmalate synthase [EC:2.3.3.13]
K01702		K01702	K01702	LEU1; 3-isopropylmalate dehydratase [EC:4.2.1.33]
K01703 UN022340		K01703	K01703	leuC; 3-isopropylmalate/(R)-2-methylmalate dehydratase large subunit [EC:4.2.1.33 4.2.1.35]
K01704 UN021053		K01704	K01704	leuD; 3-isopropylmalate/(R)-2-methylmalate dehydratase small subunit [EC:4.2.1.33 4.2.1.35]
K00052 UN031728,UN036327,UN036491,UN038878		K00052	K00052	leuB; 3-isopropylmalate dehydrogenase [EC:1.1.1.85]
M00036 Leucine degradation, leucine => acetoacetate + acetyl-CoA [PATH:map00280] (25) (complete)	M00036 Leucine degradation, leucine => acetoacetate + acetyl-CoA [PATH:map00280] (4) (incomplete)	M00036 Leucine degradation, leucine => acetoacetate + acetyl-CoA [PATH:map00280] (3) (incomplete)	M00036	Leucine degradation, leucine => acetoacetate + acetyl-CoA [PATH:map00280]
K00826 UN001283,UN034097,UN035086,UN036823,UN038035,UN042080	K00826 UN042080	K00826	K00826	E2.6.1.42, ilvE; branched-chain amino acid aminotransferase [EC:2.6.1.42]
K00166 UN001137,UN038315	K00166 UN001137,UN038315	K00166	K00166	E1.2.4.4A, bkdA1; 2-oxoisovalerate dehydrogenase E1 component, alpha subunit [EC:1.2.4.4]
K00167 UN000319,UN026338	K00167	K00167 UN026338	K00167	E1.2.4.4B, bkdA2; 2-oxoisovalerate dehydrogenase E1 component, beta subunit [EC:1.2.4.4]
K11381	K11381	K11381	K11381	E1.2.4.4C, bkdA; 2-oxoisovalerate dehydrogenase E1 component [EC:1.2.4.4]
K09699 UN040066	K09699	K09699	K09699	E2.3.1.168, bkdB; 2-oxoisovalerate dehydrogenase E2 component (dihydrolipoyl transacylase) [EC:2.3.1.168]
K00382 UN025482,UN031609,UN039532	K00382	K00382	K00382	DLD, lpd, pdhD; dihydrolipoamide dehydrogenase [EC:1.8.1.4]
K00253 UN039644	K00253	K00253	K00253	IVD, ivd; isovaleryl-CoA dehydrogenase [EC:1.3.8.4]
K00249 UN012353,UN017885,UN033633,UN043381	K00249 UN012353	K00249 UN017885	K00249	ACADM, acd; acyl-CoA dehydrogenase [EC:1.3.8.7]
K01968 UN006049,UN018922	K01968	K01968 UN006049	K01968	E6.4.1.4A; 3-methylcrotonyl-CoA carboxylase alpha subunit [EC:6.4.1.4]
K01969 UN029271	K01969	K01969	K01969	E6.4.1.4B; 3-methylcrotonyl-CoA carboxylase beta subunit [EC:6.4.1.4]
K05607 UN030791	K05607	K05607	K05607	AUH; methylglutaconyl-CoA hydratase [EC:4.2.1.18]
K13766	K13766	K13766	K13766	liuC; methylglutaconyl-CoA hydratase [EC:4.2.1.18]
K01640 UN026086,UN039154	K01640	K01640	K01640	E4.1.3.4, HMGCL, hmgL; hydroxymethylglutaryl-CoA lyase [EC:4.1.3.4]
Lysine metabolism	Lysine metabolism	Lysine metabolism	Lysine	metabolism
M00527 Lysine biosynthesis, DAP aminotransferase pathway, aspartate => lysine [PATH:map01230 map00300] (14) (complete)		M00527 Lysine biosynthesis, DAP aminotransferase pathway, aspartate => lysine [PATH:map01230 map00300] (2) (incomplete)	M00527	Lysine biosynthesis, DAP aminotransferase pathway, aspartate => lysine [PATH:map01230 map00300]
K00928 UN002780,UN026123,UN042132		K00928 UN042132	K00928	lysC; aspartate kinase [EC:2.7.2.4]
K12524 UN000465,UN014656		K12524 UN014656	K12524	thrA; bifunctional aspartokinase / homoserine dehydrogenase 1 [EC:2.7.2.4 1.1.1.3]
K12525		K12525	K12525	metL; bifunctional aspartokinase / homoserine dehydrogenase 2 [EC:2.7.2.4 1.1.1.3]
K12526		K12526	K12526	lysAC; bifunctional diaminopimelate decarboxylase / aspartate kinase [EC:4.1.1.20 2.7.2.4]
K00133 UN038800,UN043220		K00133	K00133	asd; aspartate-semialdehyde dehydrogenase [EC:1.2.1.11]
K01714 UN037646		K01714	K01714	dapA; 4-hydroxy-tetrahydrodipicolinate synthase [EC:4.3.3.7]
K00215 UN000787,UN037529		K00215	K00215	dapB; 4-hydroxy-tetrahydrodipicolinate reductase [EC:1.17.1.8]
K10206 UN024776		K10206	K10206	E2.6.1.83; LL-diaminopimelate aminotransferase [EC:2.6.1.83]
K01778 UN019236		K01778	K01778	dapF; diaminopimelate epimerase [EC:5.1.1.7]
K01586 UN030698,UN033265		K01586	K01586	lysA; diaminopimelate decarboxylase [EC:4.1.1.20]
K12526		K12526
M00032 Lysine degradation, lysine => saccharopine => acetoacetyl-CoA [PATH:map00310] (12) (2 blocks missing)	M00032 Lysine degradation, lysine => saccharopine => acetoacetyl-CoA [PATH:map00310] (2) (incomplete)	M00032 Lysine degradation, lysine => saccharopine => acetoacetyl-CoA [PATH:map00310] (1) (incomplete)	M00032	Lysine degradation, lysine => saccharopine => acetoacetyl-CoA [PATH:map00310]
K00290	K00290	K00290	K00290	LYS1; saccharopine dehydrogenase (NAD+, L-lysine forming) [EC:1.5.1.7]
K00291	K00291	K00291	K00291	E1.5.1.8; saccharopine dehydrogenase (NADP+, L-lysine forming) [EC:1.5.1.8]
K00292	K00292	K00292	K00292	E1.5.1.9; saccharopine dehydrogenase (NAD+, L-glutamate forming) [EC:1.5.1.9]
K00293	K00293	K00293	K00293	LYS9; saccharopine dehydrogenase (NADP+, L-glutamate forming) [EC:1.5.1.10]
K14157 UN000328,UN026713	K14157 UN026713	K14157	K14157	AASS; alpha-aminoadipic semialdehyde synthase [EC:1.5.1.8 1.5.1.9]
K00143	K00143	K00143	K00143	LYS2; L-aminoadipate-semialdehyde dehydrogenase [EC:1.2.1.31]
K14085 UN030378,UN038178	K14085	K14085	K14085	ALDH7A1; aldehyde dehydrogenase family 7 member A1 [EC:1.2.1.31 1.2.1.8 1.2.1.3]
K00825	K00825	K00825	K00825	AADAT, KAT2; kynurenine/2-aminoadipate aminotransferase [EC:2.6.1.7 2.6.1.39]
K00164 UN020861,UN040581	K00164	K00164 UN040581	K00164	OGDH, sucA; 2-oxoglutarate dehydrogenase E1 component [EC:1.2.4.2]
K00658 UN000928,UN015789,UN031785,UN032178	K00658 UN015789	K00658	K00658	DLST, sucB; 2-oxoglutarate dehydrogenase E2 component (dihydrolipoamide succinyltransferase) [EC:2.3.1.61]
K00252 UN043677	K00252	K00252	K00252	GCDH, gcdH; glutaryl-CoA dehydrogenase [EC:1.3.8.6]
K01825	K01825	K01825	K01825	fadB; 3-hydroxyacyl-CoA dehydrogenase / enoyl-CoA hydratase / 3-hydroxybutyryl-CoA epimerase / enoyl-CoA isomerase [EC:1.1.1.35 4.2.1.17 5.1.2.3 5.3.3.8]
K01782	K01782	K01782	K01782	fadJ; 3-hydroxyacyl-CoA dehydrogenase / enoyl-CoA hydratase / 3-hydroxybutyryl-CoA epimerase [EC:1.1.1.35 4.2.1.17 5.1.2.3]
K07514	K07514	K07514	K07514	EHHADH; enoyl-CoA hydratase / 3-hydroxyacyl-CoA dehydrogenase / 3,2-trans-enoyl-CoA isomerase [EC:4.2.1.17 1.1.1.35 5.3.3.8]
K01692	K01692	K01692	K01692	paaF, echA; enoyl-CoA hydratase [EC:4.2.1.17]
K07515	K07515	K07515	K07515	HADHA; enoyl-CoA hydratase / long-chain 3-hydroxyacyl-CoA dehydrogenase [EC:4.2.1.17 1.1.1.211]
K07511 UN033778	K07511	K07511	K07511	ECHS1; enoyl-CoA hydratase [EC:4.2.1.17]
K00022	K00022	K00022	K00022	HADH; 3-hydroxyacyl-CoA dehydrogenase [EC:1.1.1.35]
Arginine and proline metabolism	Arginine and proline metabolism	Arginine and proline metabolism	Argini	ne and proline metabolism
M00015 Proline biosynthesis, glutamate => proline [PATH:map01230 map00330] (2) (complete)			M00015	Proline biosynthesis, glutamate => proline [PATH:map01230 map00330]
K00931			K00931	proB; glutamate 5-kinase [EC:2.7.2.11]
K00147			K00147	proA; glutamate-5-semialdehyde dehydrogenase [EC:1.2.1.41]
K12657 UN039292			K12657	ALDH18A1, P5CS; delta-1-pyrroline-5-carboxylate synthetase [EC:2.7.2.11 1.2.1.41]
K00286 UN040528			K00286	E1.5.1.2, proC; pyrroline-5-carboxylate reductase [EC:1.5.1.2]
M00028 Ornithine biosynthesis, glutamate => ornithine [PATH:map01210 map01230 map00330] (8) (complete)			M00028	Ornithine biosynthesis, glutamate => ornithine [PATH:map01210 map01230 map00330]
K00619			K00619	argA; amino-acid N-acetyltransferase [EC:2.3.1.1]
K00620 UN007871			K00620	argJ; glutamate N-acetyltransferase / amino-acid N-acetyltransferase [EC:2.3.1.35 2.3.1.1]
K00618			K00618	E2.3.1.1; amino-acid N-acetyltransferase [EC:2.3.1.1]
K11067			K11067	NAGS; N-acetylglutamate synthase [EC:2.3.1.1]
K14681			K14681	argHA; argininosuccinate lyase / amino-acid N-acetyltransferase [EC:4.3.2.1 2.3.1.1]
K14682 UN021924			K14682	argAB; amino-acid N-acetyltransferase [EC:2.3.1.1]
K00930 UN033069			K00930	argB; acetylglutamate kinase [EC:2.7.2.8]
K00145 UN023555			K00145	argC; N-acetyl-gamma-glutamyl-phosphate reductase [EC:1.2.1.38]
K05828			K05828	lysZ; acetylglutamate/LysW-gamma-L-alpha-aminoadipate kinase [EC:2.7.2.8 2.7.2.-]
K05829			K05829	lysY; N-acetyl-gamma-glutamyl-phosphate/LysW-gamma-L-alpha-aminoadipyl-6-phosphate reductase [EC:1.2.1.38 1.2.1.-]
K12659			K12659	ARG56; N-acetyl-gamma-glutamyl-phosphate reductase / acetylglutamate kinase [EC:1.2.1.38 2.7.2.8]
K00818 UN036345			K00818	E2.6.1.11, argD; acetylornithine aminotransferase [EC:2.6.1.11]
K00821			K00821	argD; acetylornithine/N-succinyldiaminopimelate aminotransferase [EC:2.6.1.11 2.6.1.17]
K05830			K05830	lysJ; acetylornithine/LysW-gamma-L-lysine aminotransferase [EC:2.6.1.11 2.6.1.-]
K01438 UN001135			K01438	argE; acetylornithine deacetylase [EC:3.5.1.16]
K14677 UN024797			K14677	ACY1; aminoacylase [EC:3.5.1.14]
K00620 UN007871
M00029 Urea cycle [PATH:map01230 map00330] (5) (1 block missing)		M00029 Urea cycle [PATH:map01230 map00330] (1) (incomplete)	M00029	Urea cycle [PATH:map01230 map00330]
K01948		K01948	K01948	CPS1; carbamoyl-phosphate synthase (ammonia) [EC:6.3.4.16]
K00611 UN013495		K00611	K00611	OTC, argF, argI; ornithine carbamoyltransferase [EC:2.1.3.3]
K01940 UN032635,UN038502		K01940 UN032635	K01940	E6.3.4.5, argG; argininosuccinate synthase [EC:6.3.4.5]
K01755 UN020784		K01755	K01755	argH, ASL; argininosuccinate lyase [EC:4.3.2.1]
K14681		K14681	K14681	argHA; argininosuccinate lyase / amino-acid N-acetyltransferase [EC:4.3.2.1 2.3.1.1]
K01476 UN026410		K01476	K01476	E3.5.3.1, rocF, arg; arginase [EC:3.5.3.1]
Histidine metabolism	Histidine metabolism	Histidine metabolism	Histid	ine metabolism
M00026 Histidine biosynthesis, PRPP => histidine [PATH:map01230 map00340] (16) (1 block missing)		M00026 Histidine biosynthesis, PRPP => histidine [PATH:map01230 map00340] (3) (incomplete)	M00026	Histidine biosynthesis, PRPP => histidine [PATH:map01230 map00340]
K00765 UN029346		K00765	K00765	hisG; ATP phosphoribosyltransferase [EC:2.4.2.17]
K02502		K02502	K02502	hisZ; ATP phosphoribosyltransferase regulatory subunit
K01523		K01523	K01523	hisE; phosphoribosyl-ATP pyrophosphohydrolase [EC:3.6.1.31]
K01496		K01496	K01496	hisI; phosphoribosyl-AMP cyclohydrolase [EC:3.5.4.19]
K11755 UN008410,UN029034,UN040418		K11755 UN040418,UN008410	K11755	hisIE; phosphoribosyl-ATP pyrophosphohydrolase / phosphoribosyl-AMP cyclohydrolase [EC:3.6.1.31 3.5.4.19]
K14152		K14152	K14152	HIS4; phosphoribosyl-ATP pyrophosphohydrolase / phosphoribosyl-AMP cyclohydrolase / histidinol dehydrogenase [EC:3.6.1.31 3.5.4.19 1.1.1.23]
K01814 UN028118		K01814	K01814	hisA; phosphoribosylformimino-5-aminoimidazole carboxamide ribotide isomerase [EC:5.3.1.16]
K02501		K02501	K02501	hisH; glutamine amidotransferase [EC:2.4.2.-]
K02500		K02500	K02500	hisF; cyclase [EC:4.1.3.-]
K01663 UN020057,UN028413,UN031703		K01663 UN020057	K01663	HIS7; glutamine amidotransferase / cyclase [EC:2.4.2.- 4.1.3.-]
K01693 UN034804		K01693	K01693	E4.2.1.19, hisB; imidazoleglycerol-phosphate dehydratase [EC:4.2.1.19]
K00817 UN018149,UN038571,UN041788		K00817	K00817	hisC; histidinol-phosphate aminotransferase [EC:2.6.1.9]
K04486		K04486	K04486	E3.1.3.15B; histidinol-phosphatase (PHP family) [EC:3.1.3.15]
K05602		K05602	K05602	hisN; histidinol-phosphatase [EC:3.1.3.15]
K01089		K01089	K01089	hisB; imidazoleglycerol-phosphate dehydratase / histidinol-phosphatase [EC:4.2.1.19 3.1.3.15]
K00817 UN018149,UN038571,UN041788		K00817
K00013 UN038972		K00013	K00013	hisD; histidinol dehydrogenase [EC:1.1.1.23]
K14152		K14152
Aromatic amino acid metabolism	Aromatic amino acid metabolism	Aromatic amino acid metabolism	Aromat	ic amino acid metabolism
M00022 Shikimate pathway, phosphoenolpyruvate + erythrose-4P => chorismate [PATH:map01230 map00400] (9) (complete)			M00022	Shikimate pathway, phosphoenolpyruvate + erythrose-4P => chorismate [PATH:map01230 map00400]
K01626 UN036694			K01626	E2.5.1.54, aroF, aroG, aroH; 3-deoxy-7-phosphoheptulonate synthase [EC:2.5.1.54]
K03856			K03856	AROA2, aroA; 3-deoxy-7-phosphoheptulonate synthase [EC:2.5.1.54]
K13853			K13853	aroG, aroA; 3-deoxy-7-phosphoheptulonate synthase / chorismate mutase [EC:2.5.1.54 5.4.99.5]
K01735 UN019765,UN021577,UN024943			K01735	aroB; 3-dehydroquinate synthase [EC:4.2.3.4]
K13829			K13829	aroKB; shikimate kinase / 3-dehydroquinate synthase [EC:2.7.1.71 4.2.3.4]
K03785			K03785	aroD; 3-dehydroquinate dehydratase I [EC:4.2.1.10]
K03786			K03786	aroQ, qutE; 3-dehydroquinate dehydratase II [EC:4.2.1.10]
K00014			K00014	aroE; shikimate dehydrogenase [EC:1.1.1.25]
K13832 UN031533			K13832	aroDE, DHQ-SDH; 3-dehydroquinate dehydratase / shikimate dehydrogenase [EC:4.2.1.10 1.1.1.25]
K13830			K13830	ARO1; pentafunctional AROM polypeptide [EC:4.2.3.4 4.2.1.10 1.1.1.25 2.7.1.71 2.5.1.19]
K00891 UN039786			K00891	E2.7.1.71, aroK, aroL; shikimate kinase [EC:2.7.1.71]
K13829
K00800 UN024732			K00800	aroA; 3-phosphoshikimate 1-carboxyvinyltransferase [EC:2.5.1.19]
K13830
K01736 UN036655,UN036719			K01736	aroC; chorismate synthase [EC:4.2.3.5]
M00023 Tryptophan biosynthesis, chorismate => tryptophan [PATH:map01230 map00400] (11) (complete)	M00023 Tryptophan biosynthesis, chorismate => tryptophan [PATH:map01230 map00400] (1) (incomplete)	M00023 Tryptophan biosynthesis, chorismate => tryptophan [PATH:map01230 map00400] (1) (incomplete)	M00023	Tryptophan biosynthesis, chorismate => tryptophan [PATH:map01230 map00400]
K01657 UN013235,UN030019	K01657	K01657 UN030019	K01657	trpE; anthranilate synthase component I [EC:4.1.3.27]
K01658 UN037076	K01658	K01658	K01658	trpG; anthranilate synthase component II [EC:4.1.3.27]
K13503	K13503	K13503	K13503	trpEG; anthranilate synthase [EC:4.1.3.27]
K13501	K13501	K13501	K13501	TRP1; anthranilate synthase / indole-3-glycerol phosphate synthase / phosphoribosylanthranilate isomerase [EC:4.1.3.27 4.1.1.48 5.3.1.24]
K01656	K01656	K01656	K01656	TRP3; anthranilate synthase / indole-3-glycerol phosphate synthase [EC:4.1.3.27 4.1.1.48]
K00766 UN033374	K00766	K00766	K00766	trpD; anthranilate phosphoribosyltransferase [EC:2.4.2.18]
K13497	K13497	K13497	K13497	trpGD; anthranilate synthase/phosphoribosyltransferase [EC:4.1.3.27 2.4.2.18]
K01817 UN041030	K01817	K01817	K01817	trpF; phosphoribosylanthranilate isomerase [EC:5.3.1.24]
K01656	K01656	K01656
K01609 UN035612,UN038572	K01609	K01609	K01609	trpC; indole-3-glycerol phosphate synthase [EC:4.1.1.48]
K13498	K13498	K13498	K13498	trpCF; indole-3-glycerol phosphate synthase / phosphoribosylanthranilate isomerase [EC:4.1.1.48 5.3.1.24]
K13501	K13501	K13501
K01695 UN025823,UN026986	K01695	K01695	K01695	trpA; tryptophan synthase alpha chain [EC:4.2.1.20]
K01696 UN019491,UN037020	K01696 UN037020	K01696	K01696	trpB; tryptophan synthase beta chain [EC:4.2.1.20]
K06001	K06001	K06001	K06001	K06001, trpB; tryptophan synthase beta chain [EC:4.2.1.20]
K01694	K01694	K01694	K01694	TRP; tryptophan synthase [EC:4.2.1.20]
M00025 Tyrosine biosynthesis, chorismate => tyrosine [PATH:map01230 map00400] (3) (1 block missing)		M00025 Tyrosine biosynthesis, chorismate => tyrosine [PATH:map01230 map00400] (1) (2 blocks missing)	M00025	Tyrosine biosynthesis, chorismate => tyrosine [PATH:map01230 map00400]
K01850 UN033220		K01850 UN033220	K01850	E5.4.99.5; chorismate mutase [EC:5.4.99.5]
K04092		K04092	K04092	tyrA1; chorismate mutase [EC:5.4.99.5]
K14170		K14170	K14170	pheA; chorismate mutase / prephenate dehydratase [EC:5.4.99.5 4.2.1.51]
K04093		K04093	K04093	pheA1; chorismate mutase [EC:5.4.99.5]
K04516		K04516	K04516	AROA1, aroA; chorismate mutase [EC:5.4.99.5]
K06208		K06208	K06208	aroH; chorismate mutase [EC:5.4.99.5]
K06209		K06209	K06209	pheB; chorismate mutase [EC:5.4.99.5]
K13853		K13853	K13853	aroG, aroA; 3-deoxy-7-phosphoheptulonate synthase / chorismate mutase [EC:2.5.1.54 5.4.99.5]
K00210		K00210	K00210	E1.3.1.12; prephenate dehydrogenase [EC:1.3.1.12]
K04517		K04517	K04517	tyrA2; prephenate dehydrogenase [EC:1.3.1.12]
K14187		K14187	K14187	tyrA; chorismate mutase / prephenate dehydrogenase [EC:5.4.99.5 1.3.1.12]
K00815 UN024114,UN037010		K00815	K00815	TAT; tyrosine aminotransferase [EC:2.6.1.5]
K00832		K00832	K00832	tyrB; aromatic-amino-acid transaminase [EC:2.6.1.57]
K00838		K00838	K00838	ARO8; aromatic amino acid aminotransferase I [EC:2.6.1.57 2.6.1.27 2.6.1.5]
M00040 Tyrosine biosynthesis, prephanate => pretyrosine => tyrosine [PATH:map01230 map00400] (2) (complete)			M00040	Tyrosine biosynthesis, prephanate => pretyrosine => tyrosine [PATH:map01230 map00400]
K00832			K00832	tyrB; aromatic-amino-acid transaminase [EC:2.6.1.57]
K15849 UN033705			K15849	PAT, AAT; bifunctional aspartate aminotransferase and glutamate/aspartate-prephenate aminotransferase [EC:2.6.1.1 2.6.1.78 2.6.1.79]
K00220			K00220	tyrC; cyclohexadieny/prephenate dehydrogenase [EC:1.3.1.43 1.3.1.12]
K15226			K15226	tyrAa; arogenate dehydrogenase (NADP+) [EC:1.3.1.78]
K15227 UN042232			K15227	TYRAAT; arogenate dehydrogenase (NADP+), plant [EC:1.3.1.78]
M00044 Tyrosine degradation, tyrosine => homogentisate [PATH:map00350] (7) (complete)	M00044 Tyrosine degradation, tyrosine => homogentisate [PATH:map00350] (1) (incomplete)	M00044 Tyrosine degradation, tyrosine => homogentisate [PATH:map00350] (1) (incomplete)	M00044	Tyrosine degradation, tyrosine => homogentisate [PATH:map00350]
K03334 UN042005	K03334	K03334	K03334	IL4I1; L-amino-acid oxidase [EC:1.4.3.2]
K00457 UN038385	K00457	K00457	K00457	HPD, hppD; 4-hydroxyphenylpyruvate dioxygenase [EC:1.13.11.27]
K00451 UN019401	K00451	K00451	K00451	HGD, hmgA; homogentisate 1,2-dioxygenase [EC:1.13.11.5]
K01800 UN010070,UN011693	K01800 UN010070	K01800	K01800	maiA, GSTZ1; maleylacetoacetate isomerase [EC:5.2.1.2]
K01555 UN017593,UN020919	K01555	K01555 UN017593	K01555	FAH, fahA; fumarylacetoacetase [EC:3.7.1.2]
K16171	K16171	K16171	K16171	faaH; fumarylacetoacetate (FAA) hydrolase [EC:3.7.1.2]
M00350 Capsaicin biosynthesis, L-Phenylalanine => Capsaicin [PATH:map00360] (4) (2 blocks missing)	M00350 Capsaicin biosynthesis, L-Phenylalanine => Capsaicin [PATH:map00360] (2) (incomplete)		M00350	Capsaicin biosynthesis, L-Phenylalanine => Capsaicin [PATH:map00360]
K10775	K10775		K10775	E4.3.1.24; phenylalanine ammonia-lyase [EC:4.3.1.24]
K13064	K13064		K13064	PTAL; phenylalanine/tyrosine ammonia-lyase [EC:4.3.1.25]
K00487	K00487		K01904	E6.2.1.12; 4-coumarate--CoA ligase [EC:6.2.1.12]
K01904 UN026366,UN029596	K01904
K00588 UN006532,UN026179	K00588 UN026179,UN006532		K00588	E2.1.1.104; caffeoyl-CoA O-methyltransferase [EC:2.1.1.104]
M00037 Melatonin biosynthesis, tryptophan => serotonin => melatonin [PATH:map00380] (4) (2 blocks missing)	M00037 Melatonin biosynthesis, tryptophan => serotonin => melatonin [PATH:map00380] (1) (incomplete)		M00037	Melatonin biosynthesis, tryptophan => serotonin => melatonin [PATH:map00380]
K00502	K00502		K00502	TPH1_2; tryptophan 5-monooxygenase [EC:1.14.16.4]
K01593	K01593		K01593	DDC; aromatic-L-amino-acid decarboxylase [EC:4.1.1.28]
K00669 UN000370,UN008401	K00669		K00669	AANAT; arylalkylamine N-acetyltransferase [EC:2.3.1.87]
K00543 UN037057,UN043489	K00543 UN037057		K00543	ASMT; acetylserotonin N-methyltransferase [EC:2.1.1.4]
Other amino acid metabolism	Other amino acid metabolism	Other amino acid metabolism	Other	amino acid metabolism
M00027 GABA (gamma-Aminobutyrate) shunt [PATH:map00250] (10) (complete)	M00027 GABA (gamma-Aminobutyrate) shunt [PATH:map00250] (5) (complete)		M00027	GABA (gamma-Aminobutyrate) shunt [PATH:map00250]
K01580 UN013832,UN020768,UN033352,UN039516	K01580 UN033352,UN020768,UN039516		K01580	E4.1.1.15, gadB, gadA, GAD; glutamate decarboxylase [EC:4.1.1.15]
K13524	K13524		K13524	ABAT; 4-aminobutyrate aminotransferase / (S)-3-amino-2-methylpropionate transaminase [EC:2.6.1.19 2.6.1.22]
K07250	K07250		K07250	gabT; 4-aminobutyrate aminotransferase / (S)-3-amino-2-methylpropionate transaminase [EC:2.6.1.19 2.6.1.22]
K00823	K00823		K00823	puuE; 4-aminobutyrate aminotransferase [EC:2.6.1.19]
K16871 UN028450,UN031966	K16871 UN031966		K16871	POP2; 4-aminobutyrate---pyruvate transaminase [EC:2.6.1.96]
K00135 UN021909,UN022280,UN028901,UN040396	K00135 UN028901		K00135	E1.2.1.16, gabD; succinate-semialdehyde dehydrogenase (NADP+) [EC:1.2.1.16]
K00139	K00139		K00139	ALDH5A1; succinate-semialdehyde dehydrogenase [EC:1.2.1.24]
M00047 Creatine pathway [PATH:map00330] (2) (2 blocks missing)	M00047 Creatine pathway [PATH:map00330] (2) (2 blocks missing)		M00047	Creatine pathway [PATH:map00330]
K00613 UN010705,UN035194	K00613 UN010705,UN035194		K00613	GATM; glycine amidinotransferase [EC:2.1.4.1]
K00542	K00542
K00933	K00933		K00933	E2.7.3.2; creatine kinase [EC:2.7.3.2]
Cofactor and vitamin biosynthesis	Cofactor and vitamin biosynthesis	Cofactor and vitamin biosynthesis	Cofact	or and vitamin biosynthesis
M00127 Thiamine biosynthesis, AIR => thiamine-P/thiamine-2P [PATH:map00730] (6) (1 block missing)		M00127 Thiamine biosynthesis, AIR => thiamine-P/thiamine-2P [PATH:map00730] (1) (incomplete)	M00127	Thiamine biosynthesis, AIR => thiamine-P/thiamine-2P [PATH:map00730]
K03147 UN026240,UN031620		K03147 UN031620	K03147	thiC; thiamine biosynthesis protein ThiC
K00877		K00877	K00877	THI20; hydroxymethylpyrimidine/phosphomethylpyrimidine kinase [EC:2.7.1.49 2.7.4.7]
K00941		K00941	K00941	thiD; hydroxymethylpyrimidine/phosphomethylpyrimidine kinase [EC:2.7.1.49 2.7.4.7]
K14153 UN039062		K14153	K14153	thiDE; hydroxymethylpyrimidine kinase / phosphomethylpyrimidine kinase / thiamine-phosphate diphosphorylase [EC:2.7.1.49 2.7.4.7 2.5.1.3]
K00878 UN000542,UN001273		K00878	K00878	thiM; hydroxyethylthiazole kinase [EC:2.7.1.50]
K14154		K14154	K14154	THI6; thiamine-phosphate diphosphorylase / hydroxyethylthiazole kinase [EC:2.5.1.3 2.7.1.50]
K00788		K00788	K00788	thiE; thiamine-phosphate pyrophosphorylase [EC:2.5.1.3]
K14153 UN039062		K14153
K14154		K14154
K00946		K00946	K00946	thiL; thiamine-monophosphate kinase [EC:2.7.4.16]
M00125 Riboflavin biosynthesis, GTP => riboflavin/FMN/FAD [PATH:map00740] (17) (complete)	M00125 Riboflavin biosynthesis, GTP => riboflavin/FMN/FAD [PATH:map00740] (2) (incomplete)	M00125 Riboflavin biosynthesis, GTP => riboflavin/FMN/FAD [PATH:map00740] (1) (incomplete)	M00125	Riboflavin biosynthesis, GTP => riboflavin/FMN/FAD [PATH:map00740]
K01497	K01497	K01497	K01497	ribA, RIB1; GTP cyclohydrolase II [EC:3.5.4.25]
K14652 UN027527,UN033295	K14652 UN033295	K14652	K14652	ribBA; 3,4-dihydroxy 2-butanone 4-phosphate synthase / GTP cyclohydrolase II [EC:4.1.99.12 3.5.4.25]
K01498	K01498	K01498	K01498	ribD1; diaminohydroxyphosphoribosylaminopyrimidine deaminase [EC:3.5.4.26]
K00082	K00082	K00082	K00082	ribD2; 5-amino-6-(5-phosphoribosylamino)uracil reductase [EC:1.1.1.193]
K11752 UN007966,UN041090	K11752	K11752	K11752	ribD; diaminohydroxyphosphoribosylaminopyrimidine deaminase / 5-amino-6-(5-phosphoribosylamino)uracil reductase [EC:3.5.4.26 1.1.1.193]
K02858 UN037502,UN037922	K02858	K02858	K02858	ribB, RIB3; 3,4-dihydroxy 2-butanone 4-phosphate synthase [EC:4.1.99.12]
K14652 UN027527,UN033295	K14652 UN033295	K14652
K00794 UN034767	K00794	K00794	K00794	ribH, RIB4; 6,7-dimethyl-8-ribityllumazine synthase [EC:2.5.1.78]
K00793 UN043339,UN054107	K00793	K00793	K00793	ribE, RIB5; riboflavin synthase [EC:2.5.1.9]
K00861 UN010656,UN017872,UN026725,UN041035	K00861	K00861 UN017872	K00861	RFK, FMN1; riboflavin kinase [EC:2.7.1.26]
K00953 UN000543,UN053971	K00953	K00953	K00953	FLAD1; FAD synthetase [EC:2.7.7.2]
K11753	K11753	K11753	K11753	ribF; riboflavin kinase / FMN adenylyltransferase [EC:2.7.1.26 2.7.7.2]
M00124 Pyridoxal biosynthesis, erythrose-4P => pyridoxal-5P [PATH:map00750] (2) (incomplete)			M00124	Pyridoxal biosynthesis, erythrose-4P => pyridoxal-5P [PATH:map00750]
K03472			K03472	epd; D-erythrose 4-phosphate dehydrogenase [EC:1.2.1.72]
K03473			K03473	pdxB; erythronate-4-phosphate dehydrogenase [EC:1.1.1.290]
K00831 UN037981			K00831	serC, PSAT1; phosphoserine aminotransferase [EC:2.6.1.52]
K00097			K00097	pdxA; 4-hydroxythreonine-4-phosphate dehydrogenase [EC:1.1.1.262]
K03474			K03474	pdxJ; pyridoxine 5-phosphate synthase [EC:2.6.99.2]
K00275 UN003217			K00275	pdxH, PNPO; pyridoxamine 5'-phosphate oxidase [EC:1.4.3.5]
M00115 NAD biosynthesis, aspartate => NAD [PATH:map00760] (6) (complete)	M00115 NAD biosynthesis, aspartate => NAD [PATH:map00760] (1) (incomplete)	M00115 NAD biosynthesis, aspartate => NAD [PATH:map00760] (1) (incomplete)	M00115	NAD biosynthesis, aspartate => NAD [PATH:map00760]
K00278 UN018578,UN051672	K00278 UN018578	K00278	K00278	nadB; L-aspartate oxidase [EC:1.4.3.16]
K03517 UN032936	K03517	K03517	K03517	nadA; quinolinate synthase [EC:2.5.1.72]
K00767 UN027157	K00767	K00767	K00767	nadC, QPRT; nicotinate-nucleotide pyrophosphorylase (carboxylating) [EC:2.4.2.19]
K00969	K00969	K00969	K00969	nadD; nicotinate-nucleotide adenylyltransferase [EC:2.7.7.18]
K06210 UN039347	K06210	K06210	K06210	NMNAT; nicotinamide mononucleotide adenylyltransferase [EC:2.7.7.1 2.7.7.18]
K01916	K01916	K01916	K01916	nadE; NAD+ synthase [EC:6.3.1.5]
K01950 UN004991	K01950	K01950 UN004991	K01950	E6.3.5.1, NADSYN1, QNS1, nadE; NAD+ synthase (glutamine-hydrolysing) [EC:6.3.5.1]
M00119 Pantothenate biosynthesis, valine/L-aspartate => pantothenate [PATH:map00770] (7) (incomplete)	M00119 Pantothenate biosynthesis, valine/L-aspartate => pantothenate [PATH:map00770] (1) (incomplete)		M00119	Pantothenate biosynthesis, valine/L-aspartate => pantothenate [PATH:map00770]
K00826 UN001283,UN034097,UN035086,UN036823,UN038035,UN042080	K00826 UN042080		K00826	E2.6.1.42, ilvE; branched-chain amino acid aminotransferase [EC:2.6.1.42]
K00606	K00606		K00606	panB; 3-methyl-2-oxobutanoate hydroxymethyltransferase [EC:2.1.2.11]
K00077	K00077		K00077	panE, apbA; 2-dehydropantoate 2-reductase [EC:1.1.1.169]
K01579	K01579		K01579	panD; aspartate 1-decarboxylase [EC:4.1.1.11]
K01918 UN021176	K01918		K01918	panC; pantoate--beta-alanine ligase [EC:6.3.2.1]
K13799	K13799		K13799	panC-cmk; pantoate ligase / cytidylate kinase [EC:6.3.2.1 2.7.4.14]
M00120 Coenzyme A biosynthesis, pantothenate => CoA [PATH:map00770] (12) (complete)	M00120 Coenzyme A biosynthesis, pantothenate => CoA [PATH:map00770] (3) (2 blocks missing)	M00120 Coenzyme A biosynthesis, pantothenate => CoA [PATH:map00770] (1) (2 blocks missing)	M00120	Coenzyme A biosynthesis, pantothenate => CoA [PATH:map00770]
K00867	K00867	K00867	K00867	coaA; type I pantothenate kinase [EC:2.7.1.33]
K03525	K03525	K03525	K03525	coaX; type III pantothenate kinase [EC:2.7.1.33]
K09680 UN000493,UN033282,UN038906	K09680 UN038906	K09680 UN000493	K09680	coaW; type II pantothenate kinase [EC:2.7.1.33]
K01947	K01947	K01947	K01947	birA-coaX; biotin-[acetyl-CoA-carboxylase] ligase / type III pantothenate kinase [EC:6.3.4.15 2.7.1.33]
K01922 UN018818,UN030202	K01922 UN018818	K01922	K01922	PPCS, coaB; phosphopantothenate-cysteine ligase [EC:6.3.2.5]
K01598 UN024677,UN036847	K01598	K01598	K01598	PPCDC, coaC; phosphopantothenoylcysteine decarboxylase [EC:4.1.1.36]
K13038	K13038	K13038	K13038	coaBC, dfp; phosphopantothenoylcysteine decarboxylase / phosphopantothenate--cysteine ligase [EC:4.1.1.36 6.3.2.5]
K02318 UN035286	K02318	K02318	K02318	COASY; phosphopantetheine adenylyltransferase / dephospho-CoA kinase [EC:2.7.7.3 2.7.1.24]
K00954	K00954	K00954	K00954	E2.7.7.3A, coaD, kdtB; pantetheine-phosphate adenylyltransferase [EC:2.7.7.3]
K02201 UN001212,UN021474,UN028145	K02201	K02201	K02201	E2.7.7.3B; pantetheine-phosphate adenylyltransferase [EC:2.7.7.3]
K00859 UN037561	K00859 UN037561	K00859	K00859	coaE; dephospho-CoA kinase [EC:2.7.1.24]
M00572 Pimeloyl-ACP biosynthesis, BioC-BioH pathway, malonyl-ACP => pimeloyl-ACP [PATH:map00780] (29) (2 blocks missing)	M00572 Pimeloyl-ACP biosynthesis, BioC-BioH pathway, malonyl-ACP => pimeloyl-ACP [PATH:map00780] (9) (incomplete)	M00572 Pimeloyl-ACP biosynthesis, BioC-BioH pathway, malonyl-ACP => pimeloyl-ACP [PATH:map00780] (2) (incomplete)	M00572	Pimeloyl-ACP biosynthesis, BioC-BioH pathway, malonyl-ACP => pimeloyl-ACP [PATH:map00780]
K02169	K02169	K02169	K02169	bioC; malonyl-CoA O-methyltransferase [EC:2.1.1.197]
K16592	K16592	K16592	K16592	bioCG; BioC/BioG fusion protein
K00647	K00647	K00647	K00647	fabB; 3-oxoacyl-[acyl-carrier-protein] synthase I [EC:2.3.1.41]
K09458 UN004507,UN026740,UN031683,UN033967,UN033995,UN039685,UN043058	K09458	K09458 UN043058	K09458	fabF; 3-oxoacyl-[acyl-carrier-protein] synthase II [EC:2.3.1.179]
K00059 UN021649,UN022582,UN025220,UN027251,UN028276,UN028432,UN028564,UN028580,UN030160,UN030692,UN031701,UN034373,UN035173,UN036079,UN037663,UN038431,UN038801,UN042283,UN051062	K00059 UN036079,UN028580,UN038431,UN028276,UN034373,UN042283,UN027251,UN028564,UN051062	K00059 UN035173	K00059	fabG; 3-oxoacyl-[acyl-carrier protein] reductase [EC:1.1.1.100]
K02372 UN023291	K02372	K02372	K02372	fabZ; 3-hydroxyacyl-[acyl-carrier-protein] dehydratase [EC:4.2.1.59]
K00208 UN018762,UN028811	K00208	K00208	K00208	fabI; enoyl-[acyl-carrier protein] reductase I [EC:1.3.1.9 1.3.1.10]
K02170	K02170	K02170	K02170	bioH; pimelyl-[acyl-carrier protein] methyl ester esterase [EC:3.1.1.85]
K09789	K09789	K09789	K09789	bioG; biotin synthesis protein BioG
K16592	K16592	K16592
M00123 Biotin biosynthesis, pimeloyl-ACP/CoA => biotin [PATH:map00780] (4) (2 blocks missing)		M00123 Biotin biosynthesis, pimeloyl-ACP/CoA => biotin [PATH:map00780] (3) (incomplete)	M00123	Biotin biosynthesis, pimeloyl-ACP/CoA => biotin [PATH:map00780]
K00652		K00652	K00652	bioF; 8-amino-7-oxononanoate synthase [EC:2.3.1.47]
K00833 UN020187,UN041396,UN044134		K00833 UN044134,UN041396,UN020187	K00833	bioA; adenosylmethionine-8-amino-7-oxononanoate aminotransferase [EC:2.6.1.62]
K01935		K01935	K01935	bioD; dethiobiotin synthetase [EC:6.3.3.3]
K01012 UN019780		K01012	K01012	bioB; biotin synthase [EC:2.8.1.6]
M00577 Biotin biosynthesis, BioW pathway, pimelate => pimeloyl-CoA => biotin [PATH:map00780] (4) (incomplete)		M00577 Biotin biosynthesis, BioW pathway, pimelate => pimeloyl-CoA => biotin [PATH:map00780] (3) (incomplete)	M00577	Biotin biosynthesis, BioW pathway, pimelate => pimeloyl-CoA => biotin [PATH:map00780]
K01906		K01906	K01906	bioW; 6-carboxyhexanoate--CoA ligase [EC:6.2.1.14]
K00652		K00652	K00652	bioF; 8-amino-7-oxononanoate synthase [EC:2.3.1.47]
K00833 UN020187,UN041396,UN044134		K00833 UN044134,UN041396,UN020187	K00833	bioA; adenosylmethionine-8-amino-7-oxononanoate aminotransferase [EC:2.6.1.62]
K01935		K01935	K01935	bioD; dethiobiotin synthetase [EC:6.3.3.3]
K01012 UN019780		K01012	K01012	bioB; biotin synthase [EC:2.8.1.6]
M00126 Tetrahydrofolate biosynthesis, GTP => THF [PATH:map00790 map00670] (11) (1 block missing)		M00126 Tetrahydrofolate biosynthesis, GTP => THF [PATH:map00790 map00670] (3) (incomplete)	M00126	Tetrahydrofolate biosynthesis, GTP => THF [PATH:map00790 map00670]
K01495 UN035964		K01495	K01495	GCH1, folE; GTP cyclohydrolase I [EC:3.5.4.16]
K09007		K09007	K09007	GCH4, folE; GTP cyclohydrolase I [EC:3.5.4.16]
K01077		K01077	K01077	E3.1.3.1, phoA, phoB; alkaline phosphatase [EC:3.1.3.1]
K01113 UN016281,UN039896		K01113 UN016281	K01113	phoD; alkaline phosphatase D [EC:3.1.3.1]
K13939		K13939	K13939	FOL1; dihydroneopterin aldolase / 2-amino-4-hydroxy-6-hydroxymethyldihydropteridine diphosphokinase / dihydropteroate synthase [EC:4.1.2.25 2.7.6.3 2.5.1.15]
K13940		K13940	K13940	sulD; dihydroneopterin aldolase / 2-amino-4-hydroxy-6-hydroxymethyldihydropteridine diphosphokinase [EC:4.1.2.25 2.7.6.3]
K00796 UN043486		K00796	K00796	folP; dihydropteroate synthase [EC:2.5.1.15]
K01633 UN035490		K01633	K01633	folB; dihydroneopterin aldolase [EC:4.1.2.25]
K00950 UN017605		K00950 UN017605	K00950	folK; 2-amino-4-hydroxy-6-hydroxymethyldihydropteridine diphosphokinase [EC:2.7.6.3]
K00796 UN043486		K00796
K01633 UN035490		K01633
K13941		K13941	K13941	folKP; 2-amino-4-hydroxy-6-hydroxymethyldihydropteridine diphosphokinase / dihydropteroate synthase [EC:2.7.6.3 2.5.1.15]
K11754		K11754	K11754	folC; dihydrofolate synthase / folylpolyglutamate synthase [EC:6.3.2.12 6.3.2.17]
K01930 UN012007,UN041028,UN043332		K01930 UN041028	K01930	FPGS; folylpolyglutamate synthase [EC:6.3.2.17]
K00287		K00287	K00287	folA; dihydrofolate reductase [EC:1.5.1.3]
K13998		K13998	K13998	DHFR-TS; dihydrofolate reductase / thymidylate synthase [EC:1.5.1.3 2.1.1.45]
K13938		K13938	K13938	folM; dihydromonapterin reductase / dihydrofolate reductase [EC:1.5.1.- 1.5.1.3]
M00121 Heme biosynthesis, glutamate => protoheme/siroheme [PATH:map00860] (24) (1 block missing)	M00121 Heme biosynthesis, glutamate => protoheme/siroheme [PATH:map00860] (1) (incomplete)	M00121 Heme biosynthesis, glutamate => protoheme/siroheme [PATH:map00860] (2) (incomplete)	M00121	Heme biosynthesis, glutamate => protoheme/siroheme [PATH:map00860]
K01885 UN014112,UN020774,UN035644,UN037840	K01885	K01885	K01885	EARS, gltX; glutamyl-tRNA synthetase [EC:6.1.1.17]
K14163	K14163	K14163	K14163	EPRS; bifunctional glutamyl/prolyl-tRNA synthetase [EC:6.1.1.17 6.1.1.15]
K02492 UN033182	K02492	K02492	K02492	hemA; glutamyl-tRNA reductase [EC:1.2.1.70]
K01845 UN038965	K01845	K01845	K01845	hemL; glutamate-1-semialdehyde 2,1-aminomutase [EC:5.4.3.8]
K01698 UN038081	K01698	K01698	K01698	hemB, ALAD; porphobilinogen synthase [EC:4.2.1.24]
K01749 UN039426	K01749	K01749	K01749	hemC, HMBS; hydroxymethylbilane synthase [EC:2.5.1.61]
K01719 UN000584,UN043875	K01719	K01719	K01719	hemD, UROS; uroporphyrinogen-III synthase [EC:4.2.1.75]
K13542	K13542	K13542	K13542	cobA-hemD; uroporphyrinogen III methyltransferase / synthase [EC:2.1.1.107 4.2.1.75]
K13543	K13543	K13543	K13543	hemDX; uroporphyrinogen III methyltransferase / synthase [EC:2.1.1.107 4.2.1.75]
K01599 UN020032,UN023469,UN030340,UN054233	K01599	K01599	K01599	hemE, UROD; uroporphyrinogen decarboxylase [EC:4.1.1.37]
K00228 UN034383,UN039081	K00228	K00228	K00228	hemF, CPOX; coproporphyrinogen III oxidase [EC:1.3.3.3]
K02495 UN001082,UN013792	K02495	K02495 UN013792	K02495	hemN, hemZ; oxygen-independent coproporphyrinogen III oxidase [EC:1.3.99.22]
K00230	K00230	K00230	K00230	hemG; menaquinone-dependent protoporphyrinogen oxidase [EC:1.3.5.3]
K00231 UN007995,UN021154,UN021512,UN042352	K00231	K00231 UN007995	K00231	PPOX, hemY; oxygen-dependent protoporphyrinogen oxidase [EC:1.3.3.4]
K01772 UN013701,UN034469	K01772 UN013701	K01772	K01772	hemH, FECH; ferrochelatase [EC:4.99.1.1]
K02302	K02302	K02302
K00589	K00589	K00589	K00589	MET1; uroporphyrin-III C-methyltransferase [EC:2.1.1.107]
K02303	K02303	K02303	K02303	cobA; uroporphyrin-III C-methyltransferase [EC:2.1.1.107]
K02496	K02496	K02496	K02496	hemX; uroporphyrin-III C-methyltransferase [EC:2.1.1.107]
K13542	K13542	K13542
K13543	K13543	K13543
K02304	K02304	K02304	K02304	MET8; precorrin-2 dehydrogenase / sirohydrochlorin ferrochelatase [EC:1.3.1.76 4.99.1.4]
K03794	K03794	K03794	K03794	sirB; sirohydrochlorin ferrochelatase [EC:4.99.1.4]
M00129 Ascorbate biosynthesis, animals, glucose-1P => ascorbate [PATH:map00040 map00053] (7) (complete)	M00129 Ascorbate biosynthesis, animals, glucose-1P => ascorbate [PATH:map00040 map00053] (2) (incomplete)	M00129 Ascorbate biosynthesis, animals, glucose-1P => ascorbate [PATH:map00040 map00053] (1) (incomplete)	M00129	Ascorbate biosynthesis, animals, glucose-1P => ascorbate [PATH:map00040 map00053]
K00963 UN033200	K00963 UN033200	K00963	K00963	UGP2, galU, galF; UTP--glucose-1-phosphate uridylyltransferase [EC:2.7.7.9]
K00012 UN038909	K00012	K00012	K00012	UGDH, ugd; UDPglucose 6-dehydrogenase [EC:1.1.1.22]
K00699 UN028990	K00699	K00699	K00699	UGT; glucuronosyltransferase [EC:2.4.1.17]
K01195 UN000317,UN054644	K01195	K01195 UN000317	K01195	E3.2.1.31, GUSB, uidA; beta-glucuronidase [EC:3.2.1.31]
K14756	K14756	K14756	K14756	KL; klotho [EC:3.2.1.31]
K01053 UN023504	K01053 UN023504	K01053	K01053	E3.1.1.17, gnl, RGN; gluconolactonase [EC:3.1.1.17]
K00103 UN029228	K00103	K00103	K00103	E1.1.3.8; L-gulonolactone oxidase [EC:1.1.3.8]
M00114 Ascorbate biosynthesis, plants, glucose-6P => ascorbate [PATH:map00010 map00051 map00053] (13) (1 block missing)	M00114 Ascorbate biosynthesis, plants, glucose-6P => ascorbate [PATH:map00010 map00051 map00053] (1) (incomplete)		M00114	Ascorbate biosynthesis, plants, glucose-6P => ascorbate [PATH:map00010 map00051 map00053]
K01810 UN029635	K01810		K01810	GPI, pgi; glucose-6-phosphate isomerase [EC:5.3.1.9]
K06859	K06859		K06859	pgi1; glucose-6-phosphate isomerase, archaeal [EC:5.3.1.9]
K13810	K13810		K13810	tal-pgi; transaldolase / glucose-6-phosphate isomerase [EC:2.2.1.2 5.3.1.9]
K01809 UN029222	K01809		K01809	E5.3.1.8, manA; mannose-6-phosphate isomerase [EC:5.3.1.8]
K16011	K16011		K16011	algA, xanB, rfbA; mannose-1-phosphate guanylyltransferase / mannose-6-phosphate isomerase [EC:2.7.7.13 5.3.1.8]
K15916	K15916		K15916	pgi-pmi; glucose/mannose-6-phosphate isomerase [EC:5.3.1.9 5.3.1.8]
K16881	K16881		K16881	K16881; mannose-1-phosphate guanylyltransferase / phosphomannomutase [EC:2.7.7.13 5.4.2.8]
K17497 UN019105,UN035185	K17497		K17497	PMM; phosphomannomutase [EC:5.4.2.8]
K01840	K01840		K01840	manB; phosphomannomutase [EC:5.4.2.8]
K15778	K15778		K15778	pmm-pgm; phosphomannomutase / phosphoglucomutase [EC:5.4.2.8 5.4.2.2]
K00966 UN032952,UN037822	K00966		K00966	GMPP; mannose-1-phosphate guanylyltransferase [EC:2.7.7.13]
K00971	K00971		K00971	manC, cpsB; mannose-1-phosphate guanylyltransferase [EC:2.7.7.13]
K16011	K16011		K10046	GME; GDP-D-mannose 3', 5'-epimerase [EC:5.1.3.18 5.1.3.-]
K10046 UN025544,UN027627,UN038731	K10046 UN025544		K14190	VTC2_5; GDP-L-galactose phosphorylase [EC:2.7.7.69]
K14190 UN023621	K14190		K10047	VTC4; inositol-phosphate phosphatase / L-galactose 1-phosphate phosphatase [EC:3.1.3.25 3.1.3.-]
K10047	K10047		K00064	E1.1.1.122; D-threo-aldose 1-dehydrogenase [EC:1.1.1.122]
K00064	K00064
K17744 UN038011	K17744
K00225 UN037649,UN039158	K00225		K00225	E1.3.2.3; L-galactono-1,4-lactone dehydrogenase [EC:1.3.2.3]
K05276	K05276		K05276	E1.3.3.12; L-galactonolactone oxidase [EC:1.3.3.12]
M00112 Tocopherol biosynthesis [PATH:map00130] (7) (complete)	M00112 Tocopherol biosynthesis [PATH:map00130] (2) (incomplete)	M00112 Tocopherol biosynthesis [PATH:map00130] (1) (incomplete)	M00112	Tocopherol biosynthesis [PATH:map00130]
K09833 UN011894,UN026306	K09833 UN011894,UN026306	K09833	K09833	HPT, TPT; homogenitisate phytyltransferase
K12502 UN032894	K12502	K12502	K12502	VTE3, APG1; MPBQ/MSBQ methyltransferase
K09834 UN017718,UN038443	K09834	K09834	K09834	VTE1, SXD1; tocopherol cyclase
K05928 UN018062,UN021724	K05928	K05928 UN018062	K05928	E2.1.1.95; tocopherol O-methyltransferase [EC:2.1.1.95]
M00128 Ubiquinone biosynthesis, eukaryotes, chorismate => ubiquinone [PATH:map00130] (4) (incomplete)			M00128	Ubiquinone biosynthesis, eukaryotes, chorismate => ubiquinone [PATH:map00130]
K03181			K03181	ubiC; chorismate--pyruvate lyase [EC:4.1.3.40]
K06125			K06125	COQ2; 4-hydroxybenzoate hexaprenyltransferase [EC:2.5.1.-]
K00591 UN042674			K00591	COQ3; hexaprenyldihydroxybenzoate methyltransferase [EC:2.1.1.114]
K06126 UN018669			K06126	COQ6; ubiquinone biosynthesis monooxygenase Coq6 [EC:1.14.13.-]
K06127 UN005147			K06127	COQ5; ubiquinone biosynthesis methyltransferase [EC:2.1.1.201]
K06134			K06134	COQ7; ubiquinone biosynthesis monooxygenase Coq7 [EC:1.14.13.-]
K00591 UN042674
M00116 Menaquinone biosynthesis, chorismate => menaquinone [PATH:map00130] (5) (incomplete)		M00116 Menaquinone biosynthesis, chorismate => menaquinone [PATH:map00130] (1) (incomplete)	M00116	Menaquinone biosynthesis, chorismate => menaquinone [PATH:map00130]
K01851		K01851	K01851	pchA; salicylate biosynthesis isochorismate synthase [EC:5.4.4.2]
K02552		K02552	K02552	menF; menaquinone-specific isochorismate synthase [EC:5.4.4.2]
K02361		K02361	K02361	entC; isochorismate synthase [EC:5.4.4.2]
K02551		K02551	K02551	menD; 2-succinyl-5-enolpyruvyl-6-hydroxy-3-cyclohexene-1-carboxylate synthase [EC:2.2.1.9]
K08680		K08680	K08680	menH; 2-succinyl-6-hydroxy-2,4-cyclohexadiene-1-carboxylate synthase [EC:4.2.99.20]
K02549		K02549	K02549	menC; O-succinylbenzoate synthase [EC:4.2.1.113]
K01911		K01911	K01911	menE; O-succinylbenzoic acid--CoA ligase [EC:6.2.1.26]
K01661 UN027257,UN027474		K01661	K01661	menB; naphthoate synthase [EC:4.1.3.36]
K12073		K12073	K12073	E3.1.2.28; 1,4-dihydroxy-2-naphthoyl-CoA hydrolase [EC:3.1.2.28]
K02548 UN019695,UN034721		K02548 UN034721	K02548	menA; 1,4-dihydroxy-2-naphthoate octaprenyltransferase [EC:2.5.1.74 2.5.1.-]
K03183 UN018583		K03183	K03183	ubiE; ubiquinone/menaquinone biosynthesis methyltransferase [EC:2.1.1.163 2.1.1.201]
M00118 Glutathione biosynthesis, glutamate => glutathione [PATH:map00480] (4) (complete)	M00118 Glutathione biosynthesis, glutamate => glutathione [PATH:map00480] (2) (1 block missing)		M00118	Glutathione biosynthesis, glutamate => glutathione [PATH:map00480]
K11204	K11204		K11204	GCLC; glutamate--cysteine ligase catalytic subunit [EC:6.3.2.2]
K11205	K11205		K11205	GCLM; glutamate--cysteine ligase regulatory subunit
K01919 UN021530,UN023947,UN038043	K01919 UN023947,UN038043		K01919	gshA; glutamate--cysteine ligase [EC:6.3.2.2]
K01920 UN038703	K01920		K01920	E6.3.2.3, gshB; glutathione synthase [EC:6.3.2.3]
M00141 C1-unit interconversion, eukaryotes [PATH:map00670] (10) (complete)	M00141 C1-unit interconversion, eukaryotes [PATH:map00670] (2) (1 block missing)	M00141 C1-unit interconversion, eukaryotes [PATH:map00670] (1) (1 block missing)	M00141	C1-unit interconversion, eukaryotes [PATH:map00670]
K00600 UN025091,UN028941,UN033272,UN039111,UN039518	K00600 UN033272,UN039518	K00600	K00600	glyA, SHMT; glycine hydroxymethyltransferase [EC:2.1.2.1]
K00288 UN004532,UN022033,UN037725,UN037973,UN038097	K00288	K00288 UN004532	K00288	MTHFD; methylenetetrahydrofolate dehydrogenase (NADP+) / methenyltetrahydrofolate cyclohydrolase / formyltetrahydrofolate synthetase [EC:1.5.1.5 3.5.4.9 6.3.4.3]
K13403	K13403	K13403	K13403	MTHFD2; methylenetetrahydrofolate dehydrogenase(NAD+) / 5,10-methenyltetrahydrofolate cyclohydrolase [EC:1.5.1.15 3.5.4.9]
K13402	K13402	K13402	K13402	MTHFD1L; monofunctional C1-tetrahydrofolate synthase, mitochondrial [EC:6.3.4.3]
Polyamine biosynthesis	Polyamine biosynthesis	Polyamine biosynthesis	Polyam	ine biosynthesis
M00133 Polyamine biosynthesis, arginine => agmatine => putrescine => spermidine [PATH:map00330] (6) (1 block missing)	M00135 GABA biosynthesis, eukaryotes, putrescine => GABA [PATH:map00330] (2) (1 block missing)	M00133 Polyamine biosynthesis, arginine => agmatine => putrescine => spermidine [PATH:map00330] (1) (incomplete)	M00133	Polyamine biosynthesis, arginine => agmatine => putrescine => spermidine [PATH:map00330]
K01583	K00657 UN040835	K01583	K01583	E4.1.1.19; arginine decarboxylase [EC:4.1.1.19]
K01584	K00274	K01584	K01584	E4.1.1.19A, adi; arginine decarboxylase [EC:4.1.1.19]
K01585 UN029802	K00128 UN039202	K01585	K01585	E4.1.1.19S, speA; arginine decarboxylase [EC:4.1.1.19]
K02626	K14085	K02626	K02626	pdaD; arginine decarboxylase [EC:4.1.1.19]
K01480 UN035561,UN037657,UN043982	K00149	K01480 UN043982	K01480	E3.5.3.11, speB; agmatinase [EC:3.5.3.11]
K01611		K01611	K01611	speD, AMD1; S-adenosylmethionine decarboxylase [EC:4.1.1.50]
K00797 UN027983,UN034839		K00797	K00797	speE, SRM; spermidine synthase [EC:2.5.1.16]
M00134 Polyamine biosynthesis, arginine => ornithine => putrescine [PATH:map00330] (3) (complete)			M00134	Polyamine biosynthesis, arginine => ornithine => putrescine [PATH:map00330]
K01476 UN026410			K01476	E3.5.3.1, rocF, arg; arginase [EC:3.5.3.1]
K01581 UN029769,UN039521			K01581	E4.1.1.17, ODC1, speC, speF; ornithine decarboxylase [EC:4.1.1.17]
M00135 GABA biosynthesis, eukaryotes, putrescine => GABA [PATH:map00330] (10) (1 block missing)		M00135 GABA biosynthesis, eukaryotes, putrescine => GABA [PATH:map00330] (1) (2 blocks missing)	M00135	GABA biosynthesis, eukaryotes, putrescine => GABA [PATH:map00330]
K00657 UN014060,UN040835		K00657	K00657	E2.3.1.57, speG; diamine N-acetyltransferase [EC:2.3.1.57]
K00274		K00274	K00274	MAO, aofH; monoamine oxidase [EC:1.4.3.4]
K00128 UN018015,UN032521,UN032566,UN039202,UN041990,UN043432		K00128 UN032566	K00128	E1.2.1.3; aldehyde dehydrogenase (NAD+) [EC:1.2.1.3]
K14085 UN030378,UN038178		K14085	K14085	ALDH7A1; aldehyde dehydrogenase family 7 member A1 [EC:1.2.1.31 1.2.1.8 1.2.1.3]
K00149		K00149	K00149	ALDH9A1; aldehyde dehydrogenase family 9 member A1 [EC:1.2.1.47 1.2.1.3]
Phenylpropanoid and flavonoid biosynthesis	Phenylpropanoid and flavonoid biosynthesis	Phenylpropanoid and flavonoid biosynthesis	Phenyl	propanoid and flavonoid biosynthesis
M00039 Lignin biosynthesis, cinnamate => lignin [PATH:map00940] (11) (incomplete)			M00039	Lignin biosynthesis, cinnamate => lignin [PATH:map00940]
K00487			K00487	CYP73A; trans-cinnamate 4-monooxygenase [EC:1.14.13.11]
K01904 UN026366,UN029596			K01904	E6.2.1.12; 4-coumarate--CoA ligase [EC:6.2.1.12]
K09753			K09753	CCR; cinnamoyl-CoA reductase [EC:1.2.1.44]
K00083			K00083	E1.1.1.195; cinnamyl-alcohol dehydrogenase [EC:1.1.1.195]
K00430 UN035641,UN035986,UN040504,UN042252			K00430	E1.11.1.7; peroxidase [EC:1.11.1.7]
K11188 UN000634,UN027710,UN032022,UN039684,UN040598			K11188	PRDX6; peroxiredoxin 6, 1-Cys peroxiredoxin [EC:1.11.1.7 1.11.1.15 3.1.1.-]
K03782			K03782	katG; catalase-peroxidase [EC:1.11.1.21]
Alkaloid and other secondary metabolite biosynthesis	Alkaloid and other secondary metabolite biosynthesis	Alkaloid and other secondary metabolite biosynthesis	Alkalo	id and other secondary metabolite biosynthesis
M00033 Ectoine biosynthesis, aspartate => ectoine [PATH:map01210 map01230 map00260] (5) (incomplete)		M00033 Ectoine biosynthesis, aspartate => ectoine [PATH:map01210 map01230 map00260] (1) (incomplete)	M00033	Ectoine biosynthesis, aspartate => ectoine [PATH:map01210 map01230 map00260]
K00928 UN002780,UN026123,UN042132		K00928 UN042132	K00928	lysC; aspartate kinase [EC:2.7.2.4]
K00133 UN038800,UN043220		K00133	K00133	asd; aspartate-semialdehyde dehydrogenase [EC:1.2.1.11]
K00836		K00836	K00836	E2.6.1.76, ectB; diaminobutyrate-2-oxoglutarate transaminase [EC:2.6.1.76]
K06718		K06718	K06718	ectA; L-2,4-diaminobutyric acid acetyltransferase [EC:2.3.1.178]
K06720		K06720	K06720	ectC; L-ectoine synthase [EC:4.2.1.108]
Structural complex	Structural complex	Structural complex
Energy metabolism	Energy metabolism	Energy metabolism
Photosynthesis	Photosynthesis	Photosynthesis
M00161 Photosystem II [PATH:map00195] [BR:ko00194] (7) (1 block missing)	M00161 Photosystem II [PATH:map00195] [BR:ko00194] (6) (1 block missing)
K02703 UN018915,UN019167,UN036598,UN042066	K02703 UN036598,UN042066,UN019167
K02706	K02706
K02705 UN021952	K02705 UN021952
K02704 UN039332	K02704 UN039332
K02707 UN033439	K02707 UN033439
K02708	K02708
M00163 Photosystem I [PATH:map00195] [BR:ko00194] (5) (1 block missing)	M00163 Photosystem I [PATH:map00195] [BR:ko00194] (5) (1 block missing)
K02689 UN038804	K02689 UN038804
K02690	K02690
K02691	K02691
K02692 UN019838	K02692 UN019838
K02693 UN038660	K02693 UN038660
K02694 UN033016,UN037802	K02694 UN037802,UN033016
ATP synthesis	ATP synthesis	ATP synthesis
M00145 NAD(P)H:quinone oxidoreductase, chloroplasts and cyanobacteria [PATH:map00190] (5) (1 block missing)	M00145 NAD(P)H:quinone oxidoreductase, chloroplasts and cyanobacteria [PATH:map00190] (5) (1 block missing)
K05574 UN027167	K05574 UN027167
K05582 UN000591	K05582 UN000591
K05581	K05581
K05579 UN037698	K05579 UN037698
K05572	K05572
K05580	K05580
K05578	K05578
K05576	K05576
K05577	K05577
K05575 UN022548	K05575 UN022548
K05573	K05573
K05583	K05583
K05584	K05584
K05585 UN039078	K05585 UN039078
M00142 NADH:ubiquinone oxidoreductase, mitochondria [PATH:map00190] (6) (complete)	M00142 NADH:ubiquinone oxidoreductase, mitochondria [PATH:map00190] (5) (1 block missing)
K03878 UN033008	K03878 UN033008
K03879 UN038696	K03879 UN038696
K03880 UN021775	K03880
K03881	K03881
K03882 UN043337	K03882 UN043337
K03883 UN039414	K03883 UN039414
K03884 UN039314	K03884 UN039314
M00143 NADH dehydrogenase (ubiquinone) Fe-S protein/flavoprotein complex, mitochondria [PATH:map00190] (15) (complete)	M00143 NADH dehydrogenase (ubiquinone) Fe-S protein/flavoprotein complex, mitochondria [PATH:map00190] (5) (1 block missing)	M00143 NADH dehydrogenase (ubiquinone) Fe-S protein/flavoprotein complex, mitochondria [PATH:map00190] (1) (1 block missing)
K03934 UN033194	K03934	K03934
K03935 UN024241	K03935 UN024241	K03935
K03936	K03936	K03936
K03937 UN026057,UN030833	K03937 UN030833	K03937
K03938 UN019026,UN026527	K03938 UN019026,UN026527	K03938
K03939 UN052234	K03939	K03939
K03940 UN019842,UN041222	K03940	K03940
K03941 UN019784	K03941 UN019784	K03941
K03942 UN023932,UN025722,UN040819	K03942	K03942 UN023932
K03943 UN035293,UN038303	K03943	K03943
K03944	K03944	K03944
M00146 NADH dehydrogenase (ubiquinone) 1 alpha subcomplex [PATH:map00190] (11) (1 block missing)	M00146 NADH dehydrogenase (ubiquinone) 1 alpha subcomplex [PATH:map00190] (4) (1 block missing)
K03945	K03945
K03946 UN041043	K03946 UN041043
K03947	K03947
K03948	K03948
K03949 UN038445	K03949
K03950 UN022317	K03950
K03951	K03951
K03952 UN022086	K03952 UN022086
K03953 UN001388,UN020849	K03953
K03954	K03954
K03955 UN028020,UN028336	K03955 UN028020,UN028336
K03956	K03956
K11352 UN020164	K11352
K11353 UN033079,UN035583	K11353
M00147 NADH dehydrogenase (ubiquinone) 1 beta subcomplex [PATH:map00190] (3) (1 block missing)	M00147 NADH dehydrogenase (ubiquinone) 1 beta subcomplex [PATH:map00190] (3) (1 block missing)
K03957	K03957
K03958	K03958
K03959	K03959
K03960	K03960
K03961	K03961
K03962	K03962
K03963 UN039185	K03963 UN039185
K03964	K03964
K03965 UN041657	K03965 UN041657
K03966 UN022172	K03966 UN022172
K11351	K11351
K03967	K03967
K03968	K03968
M00148 Succinate dehydrogenase (ubiquinone) [PATH:map00190] (6) (1 block missing)	M00148 Succinate dehydrogenase (ubiquinone) [PATH:map00190] (3) (1 block missing)
K00236 UN021942	K00236 UN021942
K00237	K00237
K00234 UN000781,UN030065,UN035788,UN041967	K00234 UN000781,UN030065
K00235 UN039443	K00235
M00162 Cytochrome b6f complex [PATH:map00195] (3) (1 block missing)	M00162 Cytochrome b6f complex [PATH:map00195] (3) (1 block missing)
K02635 UN000830	K02635 UN000830
K02637	K02637
K02634 UN018796	K02634 UN018796
K02636 UN036982	K02636 UN036982
K02642	K02642
K02643	K02643
K03689	K03689
K02640	K02640
M00151 Cytochrome bc1 complex respiratory unit [PATH:map00190] (7) (complete)	M00151 Cytochrome bc1 complex respiratory unit [PATH:map00190] (4) (complete)
K00412 UN010423,UN022583,UN037319	K00412 UN022583,UN037319
K00413 UN023896,UN024795	K00413 UN024795
K00410	K00410
K00411 UN007768,UN041067	K00411 UN007768
K03886	K03886
K03887	K03887
K03888	K03888
K03890	K03890
K03891	K03891
K03889	K03889
M00152 Cytochrome bc1 complex [PATH:map00190] (16) (1 block missing)	M00152 Cytochrome bc1 complex [PATH:map00190] (11) (1 block missing)
K00412 UN010423,UN022583,UN037319	K00412 UN022583,UN037319
K00413 UN023896,UN024795	K00413 UN024795
K00410	K00410
K00411 UN007768,UN041067	K00411 UN007768
K00414	K00414
K00415	K00415
K00416 UN008948,UN020140,UN029098,UN040841,UN040901	K00416 UN040901,UN029098,UN020140,UN040841
K00417 UN033678,UN035313	K00417 UN035313,UN033678
K00418	K00418
K00419 UN020326,UN039133	K00419 UN020326
K00420	K00420
M00154 Cytochrome c oxidase [PATH:map00190] (14) (1 block missing)	M00154 Cytochrome c oxidase [PATH:map00190] (5) (1 block missing)	M00154 Cytochrome c oxidase [PATH:map00190] (2) (1 block missing)
K02257 UN014807	K02257	K02257
K02262 UN020647	K02262 UN020647	K02262
K02256 UN017615,UN018702,UN027782,UN042812	K02256 UN017615,UN042812,UN018702	K02256 UN027782
K02261	K02261	K02261
K02263	K02263	K02263
K02264	K02264	K02264
K02265 UN035262,UN038320	K02265	K02265
K02266	K02266	K02266
K02267 UN033298,UN038981	K02267 UN033298	K02267
K02268	K02268	K02268
K02269	K02269	K02269
K02270	K02270	K02270
K02271	K02271	K02271
K02272	K02272	K02272
K02273	K02273	K02273
K02258 UN001145	K02258	K02258
K02259 UN020619,UN030524	K02259	K02259 UN020619
K02260 UN020500	K02260	K02260
M00157 F-type ATPase, prokaryotes and chloroplasts [PATH:map00190 map00195] (9) (1 block missing)	M00157 F-type ATPase, prokaryotes and chloroplasts [PATH:map00190 map00195] (4) (1 block missing)
K02112	K02112
K02111	K02111
K02115 UN021028	K02115 UN021028
K02113 UN026803,UN033875,UN038712,UN038983,UN039555	K02113
K02114	K02114
K02110 UN032266	K02110 UN032266
K02108	K02108
K02109 UN020639,UN021990	K02109 UN020639,UN021990
M00158 F-type ATPase, eukaryotes [PATH:map00190] (15) (1 block missing)	M00158 F-type ATPase, eukaryotes [PATH:map00190] (9) (1 block missing)
K02133 UN000556,UN005073,UN021099	K02133 UN021099,UN000556
K02132 UN038365	K02132 UN038365
K02136 UN015148,UN037788	K02136 UN015148
K02137 UN033755,UN035171	K02137 UN033755
K02134 UN020034	K02134
K02135 UN026087	K02135 UN026087
K02128 UN025251,UN025434	K02128 UN025251
K02126 UN039313	K02126 UN039313
K02127	K02127
K02125	K02125
K02138 UN021664	K02138 UN021664
K02140 UN019319	K02140
K02129	K02129
K02131	K02131
K02130	K02130
K02139	K02139
K02141	K02141
K02142	K02142
K02143	K02143
M00160 V-type ATPase, eukaryotes [PATH:map00190] (20) (1 block missing)	M00160 V-type ATPase, eukaryotes [PATH:map00190] (5) (1 block missing)
K02145 UN029638,UN036392	K02145
K02147 UN036095	K02147
K02148 UN029770	K02148
K02149 UN034332	K02149
K02150 UN021391	K02150
K02151 UN011412,UN036632	K02151
K02152 UN028365	K02152 UN028365
K02153 UN028356,UN037597	K02153 UN028356
K02154 UN020252	K02154
K02146 UN039427,UN051990	K02146
K02144 UN026846,UN034543	K02144
K03662	K03662
K02155 UN021548,UN035594	K02155 UN021548
K03661 UN033242,UN052227	K03661 UN052227,UN033242
Carbohydrate and lipid metabolism	Carbohydrate and lipid metabolism	Carbohydrate and lipid metabolism
Carbohydrate metabolism	Carbohydrate metabolism	Carbohydrate metabolism
Glycan metabolism	Glycan metabolism	Glycan metabolism
M00072 Oligosaccharyltransferase [PATH:map00510] (12) (complete)	M00072 Oligosaccharyltransferase [PATH:map00510] (2) (1 block missing)	M00072 Oligosaccharyltransferase [PATH:map00510] (3) (1 block missing)
K07151 UN029853,UN030129,UN036168	K07151	K07151 UN030129
K12666 UN033064	K12666	K12666
K12667 UN038832	K12667	K12667
K12668 UN020524,UN020633,UN029037,UN040879	K12668 UN029037,UN020633	K12668 UN040879
K12669 UN026777,UN038351	K12669	K12669 UN026777
K12670 UN039373	K12670	K12670
K00730	K00730	K00730
K12691	K12691	K12691
Genetic information processing	Genetic information processing	Genetic information processing
DNA polymerase	DNA polymerase	DNA polymerase
M00261 DNA polymerase alpha / primase complex [PATH:map03030] [BR:ko03032] (2) (1 block missing)		M00261 DNA polymerase alpha / primase complex [PATH:map03030] [BR:ko03032] (2) (1 block missing)
K02320 UN019078		K02320 UN019078
K02321		K02321
K02685		K02685
K02684 UN029785		K02684 UN029785
M00262 DNA polymerase delta complex [PATH:map03030 map03410 map03420] [BR:ko03032 ko03400] (7) (1 block missing)	M00262 DNA polymerase delta complex [PATH:map03030 map03410 map03420] [BR:ko03032 ko03400] (1) (1 block missing)
K02327 UN018467,UN029556,UN038421,UN054176	K02327
K02328 UN001207,UN042926	K02328
K03504	K03504
K03505 UN039288	K03505 UN039288
M00263 DNA polymerase epsilon complex [PATH:map03030] [BR:ko03032 ko03400] (2) (1 block missing)
K02324
K02325
K02326 UN018418,UN043871
K03506
M00293 DNA polymerase zeta complex [PATH:map03460] [BR:ko03400] (5) (complete)	M00293 DNA polymerase zeta complex [PATH:map03460] [BR:ko03400] (1) (1 block missing)	M00293 DNA polymerase zeta complex [PATH:map03460] [BR:ko03400] (2) (1 block missing)
K02350 UN003910,UN017582,UN030495	K02350	K02350 UN003910,UN017582
K03508	K03508	K03508
K13728 UN023474,UN043487	K13728 UN023474	K13728
Replication system	Replication system	Replication system
M00284 Origin recognition complex [PATH:map04110 map04111 map04113] [BR:ko03032] (7) (1 block missing)	M00284 Origin recognition complex [PATH:map04110 map04111 map04113] [BR:ko03032] (3) (1 block missing)	M00284 Origin recognition complex [PATH:map04110 map04111 map04113] [BR:ko03032] (2) (1 block missing)
K02603 UN020992,UN030277,UN043057	K02603 UN043057	K02603
K02604	K02604	K02604
K02605 UN036289	K02605	K02605 UN036289
K02606 UN025779	K02606 UN025779	K02606
K02607 UN022712,UN032050	K02607 UN032050	K02607 UN022712
K02608	K02608	K02608
M00285 MCM complex [PATH:map03030 map04110 map04111 map04113] [BR:ko03032] (10) (complete)		M00285 MCM complex [PATH:map03030 map04110 map04111 map04113] [BR:ko03032] (8) (complete)
K02540 UN000260		K02540 UN000260
K02541 UN020600,UN023849		K02541 UN020600,UN023849
K02212 UN017357,UN051498		K02212 UN051498,UN017357
K02209 UN036653		K02209 UN036653
K02542 UN019250,UN043290,UN051811		K02542 UN019250,UN051811
K02210 UN015932		K02210
M00286 GINS complex [BR:ko03032] (6) (complete)		M00289 RF-C complex [PATH:map03030 map03420 map03430] [BR:ko03032 ko03400] (2) (1 block missing)
K10732 UN021807,UN038146		K10754
K10733 UN021759,UN029049		K10755 UN044116
K10734 UN000751		K10756 UN019908
K10735 UN000180
M00288 RPA complex [PATH:map03030 map03420 map03430 map03440] [BR:ko03032 ko03400] (5) (complete)
K07466 UN030158,UN031277,UN038343
K10739 UN036629
K10741
K10740 UN034729
M00289 RF-C complex [PATH:map03030 map03420 map03430] [BR:ko03032 ko03400] (8) (complete)
K10754 UN024909,UN031946,UN036134
K10755 UN021302,UN038995,UN044116
K10756 UN019908,UN030938
M00424 Shelterin complex [BR:ko03032] (2) (1 block missing)		M00424 Shelterin complex [BR:ko03032] (2) (1 block missing)
K11109		K11109
K11110		K11110
K11111		K11111
K11112		K11112
K11113 UN034071,UN040596		K11113 UN040596,UN034071
K11114		K11114
Repair system	Repair system	Repair system
M00296 BER complex [PATH:map03410] [BR:ko03400] (18) (1 block missing)	M00296 BER complex [PATH:map03410] [BR:ko03400] (2) (1 block missing)	M00296 BER complex [PATH:map03410] [BR:ko03400] (9) (1 block missing)
K10803 UN023889,UN033402	K10803	K10803 UN023889
K10798 UN018311,UN021535,UN026907,UN027029,UN029437,UN034617,UN043082,UN043317,UN051597	K10798	K10798 UN029437,UN034617,UN027029,UN018311,UN026907,UN021535
K02330	K02330	K02330
K03512 UN017039,UN018722,UN039477	K03512 UN017039	K03512 UN018722
K10981	K10981	K10981
K10776	K10776	K10776
K10771 UN000401	K10771 UN000401	K10771
K10772 UN000541,UN029939,UN039966	K10772	K10772 UN039966
M00290 Holo-TFIIH complex [PATH:map03420] [BR:ko03021 ko03400] (14) (complete)		M00290 Holo-TFIIH complex [PATH:map03420] [BR:ko03021 ko03400] (7) (1 block missing)
K03141 UN036142		K03141 UN036142
K03142 UN017788,UN034341		K03142 UN034341
K03143 UN008247,UN009169		K03143 UN009169
K03144 UN022288		K03144 UN022288
K10843 UN039431		K10843
K10844 UN007570,UN042491,UN043471		K10844 UN042491,UN007570,UN043471
K10845		K10845
K02202 UN038915		K02202
K06634 UN002061,UN007705		K06634
K10842 UN023463		K10842
M00291 MRN complex [PATH:map03440] [BR:ko03032 ko03400] (6) (complete)		M00291 MRN complex [PATH:map03440] [BR:ko03032 ko03400] (4) (complete)
K10865 UN035761		K10865 UN035761
K10866 UN006956,UN029216,UN030309		K10866 UN030309,UN029216
K10867 UN030549,UN037726		K10867 UN037726
M00292 MRX complex [PATH:map03440 map03450] [BR:ko03400] (4) (1 block missing)		M00292 MRX complex [PATH:map03440 map03450] [BR:ko03400] (3) (1 block missing)
K10865 UN035761		K10865 UN035761
K10866 UN006956,UN029216,UN030309		K10866 UN030309,UN029216
K10868		K10868
M00297 DNA-PK complex [PATH:map03450 map04110] [BR:ko03032 ko03400] (8) (complete)		M00297 DNA-PK complex [PATH:map03450 map04110] [BR:ko03032 ko03400] (5) (1 block missing)
K10884 UN032390		K10884
K10885 UN027819,UN029509		K10885 UN027819
K06642 UN020846,UN026438,UN027262,UN028193,UN030291		K06642 UN020846,UN030291,UN028193,UN027262
M00295 BRCA1-associated genome surveillance complex (BASC) [PATH:map03430 map03440 map03460] [BR:ko03400] (26) (1 block missing)		M00295 BRCA1-associated genome surveillance complex (BASC) [PATH:map03430 map03440 map03460] [BR:ko03400] (11) (1 block missing)
K10605		K10605
K08735 UN015455,UN026214		K08735 UN015455
K08737 UN013965,UN042496		K08737 UN042496
K08734		K08734
K10858		K10858
K10754 UN024909,UN031946,UN036134		K10754
K10755 UN021302,UN038995,UN044116		K10755 UN044116
K10756 UN019908,UN030938		K10756 UN019908
K04802 UN017259,UN026241		K04802 UN017259
K10865 UN035761		K10865 UN035761
K10866 UN006956,UN029216,UN030309		K10866 UN030309,UN029216
K10867 UN030549,UN037726		K10867 UN037726
K10901 UN032707,UN035670,UN035988,UN040599		K10901 UN032707,UN040599
K04728 UN007654,UN043227		K04728
M00414 Bloom's syndrome complex [PATH:map03460] [BR:ko03400] (9) (complete)		M00414 Bloom's syndrome complex [PATH:map03460] [BR:ko03400] (5) (1 block missing)
K10901 UN032707,UN035670,UN035988,UN040599		K10901 UN032707,UN040599
K03165 UN031026,UN042568		K03165 UN031026,UN042568
K10990 UN032526		K10990 UN032526
K15365 UN029474,UN034197		K15365
RNA polymerase	RNA polymerase	RNA polymerase
M00183 RNA polymerase, bacteria [PATH:map03020] [BR:ko03021 ko03400] (4) (1 block missing)	M00183 RNA polymerase, bacteria [PATH:map03020] [BR:ko03021 ko03400] (1) (1 block missing)
K03040	K03040
K03043 UN020340,UN021388,UN028209	K03043
K03046 UN042293	K03046 UN042293
K13797	K13797
K03060	K03060
K03048	K03048
M00180 RNA polymerase II, eukaryotes [PATH:map03020 map05016] [BR:ko03021 ko03400] (20) (complete)	M00180 RNA polymerase II, eukaryotes [PATH:map03020 map05016] [BR:ko03021 ko03400] (3) (1 block missing)	M00180 RNA polymerase II, eukaryotes [PATH:map03020 map05016] [BR:ko03021 ko03400] (2) (1 block missing)
K03006 UN022325,UN038047	K03006	K03006 UN038047
K03010 UN010954,UN042358	K03010	K03010 UN042358
K03011 UN032380	K03011	K03011
K03008 UN029300	K03008	K03008
K03012 UN015497,UN051988,UN052367	K03012	K03012
K03015 UN036128,UN037368	K03015	K03015
K03017 UN029090,UN035104	K03017	K03017
K03013 UN000662	K03013	K03013
K03014 UN033119,UN037013	K03014	K03014
K03016 UN005517	K03016	K03016
K03009 UN026881	K03009 UN026881	K03009
K03007 UN027976,UN029120	K03007 UN027976,UN029120	K03007
M00181 RNA polymerase III, eukaryotes [PATH:map03020 map04623] [BR:ko03021] (23) (1 block missing)	M00181 RNA polymerase III, eukaryotes [PATH:map03020 map04623] [BR:ko03021] (4) (1 block missing)	M00181 RNA polymerase III, eukaryotes [PATH:map03020 map04623] [BR:ko03021] (3) (1 block missing)
K03018 UN017320,UN029481	K03018	K03018
K03021 UN003586,UN035844,UN054065	K03021 UN003586	K03021 UN054065
K03027 UN004569,UN042110,UN042706	K03027	K03027 UN042110
K03020 UN016863,UN018855	K03020	K03020
K03023 UN035724	K03023	K03023
K03026	K03026	K03026
K14721 UN024746	K14721	K14721
K03025	K03025	K03025
K03024	K03024	K03024
K03022 UN018811	K03022	K03022
K03019 UN017293,UN034339,UN043041	K03019	K03019 UN017293
K03013 UN000662	K03013	K03013
K03014 UN033119,UN037013	K03014	K03014
K03016 UN005517	K03016	K03016
K03009 UN026881	K03009 UN026881	K03009
K03007 UN027976,UN029120	K03007 UN027976,UN029120	K03007
M00182 RNA polymerase I, eukaryotes [PATH:map03020] [BR:ko03021] (18) (complete)	M00182 RNA polymerase I, eukaryotes [PATH:map03020] [BR:ko03021] (3) (1 block missing)	M00182 RNA polymerase I, eukaryotes [PATH:map03020] [BR:ko03021] (4) (1 block missing)
K02999 UN038066	K02999	K02999
K03002 UN016024,UN021306,UN022944	K03002	K03002 UN022944,UN016024
K03027 UN004569,UN042110,UN042706	K03027	K03027 UN042110
K03020 UN016863,UN018855	K03020	K03020
K03000	K03000	K03000
K03001	K03001	K03001
K03003	K03003	K03003
K03004 UN020655	K03004	K03004
K03005 UN039249	K03005	K03005 UN039249
K03013 UN000662	K03013	K03013
K03014 UN033119,UN037013	K03014	K03014
K03016 UN005517	K03016	K03016
K03009 UN026881	K03009 UN026881	K03009
K03007 UN027976,UN029120	K03007 UN027976,UN029120	K03007
Spliceosome	Spliceosome	Spliceosome
M00351 Spliceosome, U1-snRNP [PATH:map03040] [BR:ko03041] (18) (complete)	M00351 Spliceosome, U1-snRNP [PATH:map03040] [BR:ko03041] (4) (1 block missing)
K11086 UN000746	K11086
K11087 UN019768,UN034983,UN037488	K11087 UN034983
K11096 UN025496	K11096
K11088 UN035218	K11088
K11097 UN020773	K11097 UN020773
K11098 UN018349,UN028594,UN039013,UN040883,UN052612	K11098
K11099 UN026596,UN035354	K11099 UN026596,UN035354
K11093 UN019639,UN037135	K11093
K11091 UN026542	K11091
K11095 UN011042	K11095
M00352 Spliceosome, U2-snRNP [PATH:map03040] [BR:ko03041] (43) (complete)	M00352 Spliceosome, U2-snRNP [PATH:map03040] [BR:ko03041] (7) (1 block missing)	M00352 Spliceosome, U2-snRNP [PATH:map03040] [BR:ko03041] (11) (1 block missing)
K11086 UN000746	K11086	K11086
K11087 UN019768,UN034983,UN037488	K11087 UN034983	K11087
K11096 UN025496	K11096	K11096
K11088 UN035218	K11088	K11088
K11097 UN020773	K11097 UN020773	K11097
K11098 UN018349,UN028594,UN039013,UN040883,UN052612	K11098	K11098
K11099 UN026596,UN035354	K11099 UN026596,UN035354	K11099
K11092 UN028309,UN031522	K11092 UN031522	K11092
K11094	K11094	K11094
K12825 UN001045,UN024642,UN027809,UN029507,UN035643	K12825	K12825 UN035643,UN001045,UN029507,UN027809,UN024642
K12826 UN001108	K12826	K12826 UN001108
K12827 UN026901,UN031810	K12827	K12827
K12828 UN000819,UN021386,UN053980	K12828	K12828 UN021386
K12829 UN022381,UN037616	K12829	K12829
K12830 UN016272,UN028379,UN034251,UN040209,UN043457	K12830	K12830 UN043457,UN040209
K12831 UN021428	K12831	K12831
K12832 UN038464	K12832 UN038464	K12832
K12833 UN013029,UN038290	K12833	K12833
K12835 UN017337,UN025761,UN030273	K12835	K12835 UN025761,UN030273
K12834 UN023801,UN025870	K12834 UN025870	K12834
M00354 Spliceosome, U4/U6.U5 tri-snRNP [PATH:map03040] [BR:ko03041] (61) (complete)	M00354 Spliceosome, U4/U6.U5 tri-snRNP [PATH:map03040] [BR:ko03041] (6) (1 block missing)	M00354 Spliceosome, U4/U6.U5 tri-snRNP [PATH:map03040] [BR:ko03041] (11) (1 block missing)
K11086 UN000746	K11086	K11086
K11087 UN019768,UN034983,UN037488	K11087 UN034983	K11087
K11096 UN025496	K11096	K11096
K11088 UN035218	K11088	K11088
K11097 UN020773	K11097 UN020773	K11097
K11098 UN018349,UN028594,UN039013,UN040883,UN052612	K11098	K11098
K11099 UN026596,UN035354	K11099 UN026596,UN035354	K11099
K12621 UN020380,UN030357	K12621	K12621
K12622 UN039577	K12622	K12622
K12623 UN023855	K12623	K12623
K12624 UN030857	K12624	K12624
K12625 UN039253,UN054405	K12625	K12625 UN039253
K12626 UN020642	K12626	K12626
K12627 UN033261	K12627	K12627
K12843 UN015153,UN022036	K12843	K12843 UN015153
K12662 UN017422,UN026895,UN039645	K12662	K12662
K09567 UN029731,UN037562	K09567	K09567
K12844 UN037149	K12844	K12844
K12845 UN035551	K12845 UN035551	K12845
K12852 UN030597	K12852	K12852 UN030597
K12853	K12853	K12853
K12855 UN024998,UN028137,UN037171	K12855	K12855 UN028137
K12856 UN000346,UN019826,UN021166	K12856	K12856 UN021166,UN000346
K12857 UN027732,UN029224,UN036918	K12857	K12857
K12854 UN001113,UN026997,UN038944,UN041014,UN042396	K12854	K12854 UN038944,UN042396
K12858 UN024849,UN037141,UN042425	K12858 UN042425	K12858 UN024849
K12859 UN022100,UN039049	K12859	K12859
K13099 UN032890,UN038041	K13099	K13099
K11984 UN020151,UN027461,UN035833,UN054721	K11984	K11984 UN027461,UN020151
K12847 UN032846,UN036638	K12847	K12847
K12846 UN022424	K12846	K12846
M00355 Spliceosome, 35S U5-snRNP [PATH:map03040] [BR:ko03041] (79) (complete)	M00355 Spliceosome, 35S U5-snRNP [PATH:map03040] [BR:ko03041] (10) (1 block missing)	M00355 Spliceosome, 35S U5-snRNP [PATH:map03040] [BR:ko03041] (15) (1 block missing)
K11086 UN000746	K11086	K11086
K11087 UN019768,UN034983,UN037488	K11087 UN034983	K11087
K11096 UN025496	K11096	K11096
K11088 UN035218	K11088	K11088
K11097 UN020773	K11097 UN020773	K11097
K11098 UN018349,UN028594,UN039013,UN040883,UN052612	K11098	K11098
K11099 UN026596,UN035354	K11099 UN026596,UN035354	K11099
K12856 UN000346,UN019826,UN021166	K12856	K12856 UN021166,UN000346
K12854 UN001113,UN026997,UN038944,UN041014,UN042396	K12854	K12854 UN038944,UN042396
K12852 UN030597	K12852	K12852 UN030597
K12857 UN027732,UN029224,UN036918	K12857	K12857
K10599 UN000624,UN041994	K10599	K10599
K12860 UN021328,UN027846,UN031673,UN038182	K12860	K12860 UN027846,UN031673
K12861 UN018888,UN021216,UN037078,UN052096	K12861 UN052096	K12861
K12862 UN033479,UN042219	K12862 UN033479	K12862
K12863 UN033286,UN033443	K12863 UN033443	K12863
K06063 UN022166,UN030994,UN035304,UN036771	K06063	K06063
K12867 UN035674	K12867	K12867
K12868 UN017629,UN018459,UN018842,UN020375	K12868	K12868
K12869 UN039241	K12869	K12869
K12870 UN027186,UN029366	K12870	K12870 UN027186
K12871 UN013787,UN036412	K12871	K12871
K12872 UN034362	K12872	K12872
K12873 UN028184	K12873	K12873
K12874 UN018527,UN026921,UN043243	K12874	K12874 UN043243,UN026921
K09564 UN020747,UN023885	K09564 UN023885	K09564
K12733 UN020996,UN028068,UN028830,UN043525	K12733	K12733
K12816 UN016041,UN017875,UN040300	K12816	K12816 UN016041
K13117 UN000988,UN001179	K13117	K13117 UN000988
K03283 UN004227,UN020529,UN024183,UN027673,UN038908,UN041752,UN054208	K03283 UN027673,UN038908	K03283 UN054208
K13123 UN003491,UN036365	K13123	K13123 UN003491,UN036365
M00353 Spliceosome, Prp19/CDC5L complex [PATH:map03040] [BR:ko03041] (26) (complete)	M00353 Spliceosome, Prp19/CDC5L complex [PATH:map03040] [BR:ko03041] (5) (1 block missing)	M00353 Spliceosome, Prp19/CDC5L complex [PATH:map03040] [BR:ko03041] (5) (1 block missing)
K10599 UN000624,UN041994	K10599	K10599
K12860 UN021328,UN027846,UN031673,UN038182	K12860	K12860 UN027846,UN031673
K12861 UN018888,UN021216,UN037078,UN052096	K12861 UN052096	K12861
K12862 UN033479,UN042219	K12862 UN033479	K12862
K12863 UN033286,UN033443	K12863 UN033443	K12863
K12864 UN003164,UN028937	K12864	K12864
K03283 UN004227,UN020529,UN024183,UN027673,UN038908,UN041752,UN054208	K03283 UN027673,UN038908	K03283 UN054208
K12865 UN018594,UN035625	K12865	K12865 UN035625
K12866 UN020197	K12866	K12866 UN020197
M00396 Lsm 2-8 complex [PATH:map03040 map03018] [BR:ko03041] (9) (complete)		M00396 Lsm 2-8 complex [PATH:map03040 map03018] [BR:ko03041] (1) (1 block missing)
K12621 UN020380,UN030357		K12621
K12622 UN039577		K12622
K12623 UN023855		K12623
K12624 UN030857		K12624
K12625 UN039253,UN054405		K12625 UN039253
K12626 UN020642		K12626
K12627 UN033261		K12627
M00397 Lsm 1-7 complex [PATH:map03018] (11) (complete)	M00397 Lsm 1-7 complex [PATH:map03018] (1) (1 block missing)	M00397 Lsm 1-7 complex [PATH:map03018] (2) (1 block missing)
K12620 UN011570,UN029313,UN032897	K12620 UN032897	K12620 UN011570
K12621 UN020380,UN030357	K12621	K12621
K12622 UN039577	K12622	K12622
K12623 UN023855	K12623	K12623
K12624 UN030857	K12624	K12624
K12625 UN039253,UN054405	K12625	K12625 UN039253
K12626 UN020642	K12626	K12626
M00398 Sm core complex [PATH:map03040] [BR:ko03032 ko03041] (14) (complete)	M00398 Sm core complex [PATH:map03040] [BR:ko03032 ko03041] (4) (1 block missing)
K11086 UN000746	K11086
K11087 UN019768,UN034983,UN037488	K11087 UN034983
K11096 UN025496	K11096
K11088 UN035218	K11088
K11097 UN020773	K11097 UN020773
K11098 UN018349,UN028594,UN039013,UN040883,UN052612	K11098
K11099 UN026596,UN035354	K11099 UN026596,UN035354
M00399 Cap binding complex [PATH:map03013 map03015 map03040 map03040] [BR:ko03041] (3) (complete)		M00399 Cap binding complex [PATH:map03013 map03015 map03040 map03040] [BR:ko03041] (2) (1 block missing)
K12882 UN029924,UN038257		K12882 UN038257,UN029924
K12883 UN035706		K12883
RNA processing	RNA processing	RNA processing
M00425 H/ACA ribonucleoprotein complex [PATH:map03008] [BR:ko03032 ko03009] (4) (1 block missing)	M00425 H/ACA ribonucleoprotein complex [PATH:map03008] [BR:ko03032 ko03009] (4) (1 block missing)
K11128	K11128
K11129 UN036674	K11129 UN036674
K11130 UN025131	K11130 UN025131
K11131 UN034062,UN035921	K11131 UN035921,UN034062
M00426 Survival motor neuron (SMN) complex [PATH:map03013] [BR:ko03041] (4) (1 block missing)	M00426 Survival motor neuron (SMN) complex [PATH:map03013] [BR:ko03041] (2) (1 block missing)	M00426 Survival motor neuron (SMN) complex [PATH:map03013] [BR:ko03041] (1) (1 block missing)
K13129	K13129	K13129
K13130 UN018529	K13130	K13130 UN018529
K13131	K13131	K13131
K13132	K13132	K13132
K13133	K13133	K13133
K13134	K13134	K13134
K13135	K13135	K13135
K13136	K13136	K13136
K13137 UN006106,UN031663,UN039812	K13137 UN039812,UN031663	K13137
M00427 Nuclear pore complex [PATH:map03013] (49) (1 block missing)	M00427 Nuclear pore complex [PATH:map03013] (2) (1 block missing)	M00427 Nuclear pore complex [PATH:map03013] (18) (1 block missing)
K09291 UN000587,UN030187	K09291	K09291 UN000587
K14295	K14295	K14295
K14296 UN036886	K14296	K14296 UN036886
K03345	K03345	K03345
K14297 UN019953,UN022192,UN024684,UN026972,UN033650,UN037239,UN038477	K14297	K14297 UN037239,UN038477,UN026972,UN033650
K14298 UN026388,UN027760	K14298	K14298 UN027760
K14004 UN038244	K14004	K14004
K14299	K14299	K14299
K14300 UN026395	K14300	K14300
K14301 UN000981,UN054855	K14301	K14301 UN000981
K14302	K14302	K14302
K14303	K14303	K14303
K14304 UN022676,UN053957	K14304	K14304 UN053957
K14305	K14305	K14305
K14306 UN032692,UN042707	K14306	K14306
K14307	K14307	K14307
K14308 UN032581	K14308	K14308
K14309 UN006680	K14309	K14309
K14310 UN034312	K14310	K14310
K14311	K14311	K14311
K14312 UN032938,UN033302	K14312	K14312 UN033302
K14313 UN008220	K14313	K14313
K14314 UN022417,UN042458	K14314 UN022417	K14314 UN042458
K14315	K14315	K14315
K14316	K14316	K14316
K14317	K14317	K14317
K14318 UN025841	K14318	K14318 UN025841
K12172	K12172	K12172
K14319 UN000291,UN007246,UN012009,UN021736	K14319	K14319 UN021736,UN012009
K10577 UN004980,UN019005,UN020368,UN029144	K10577 UN029144	K10577 UN004980,UN019005
K12160 UN021658,UN032334,UN035124,UN035730,UN036306,UN037098,UN037836,UN038177	K12160	K12160
K14320 UN010440	K14320	K14320
K14321 UN002053,UN003256,UN028784	K14321	K14321 UN002053,UN003256
M00428 eIF4F complex [PATH:map03013] [BR:ko03012] (11) (complete)	M00428 eIF4F complex [PATH:map03013] [BR:ko03012] (6) (complete)
K03259 UN029397,UN033019,UN035758	K03259 UN035758
K03260 UN011280,UN022183,UN038342,UN038780,UN039704	K03260 UN038780,UN022183,UN038342
K03257 UN032910,UN033565,UN036394	K03257 UN032910,UN036394
M00430 Exon junction complex (EJC) [PATH:map03013 map03015 map03040] [BR:ko03041] (27) (1 block missing)	M00430 Exon junction complex (EJC) [PATH:map03013 map03015 map03040] [BR:ko03041] (5) (1 block missing)	M00430 Exon junction complex (EJC) [PATH:map03013 map03015 map03040] [BR:ko03041] (8) (1 block missing)
K12876 UN002404,UN037223	K12876 UN037223	K12876
K12877 UN032485,UN038896	K12877	K12877
K14323	K14323	K14323
K13025 UN028383,UN030324,UN035610	K13025 UN028383	K13025 UN030324
K14324 UN037114,UN037326	K14324	K14324
K13114 UN034926,UN036073	K13114	K13114 UN034926
K12875 UN029384	K12875	K12875
K14325	K14325	K14325
K12881 UN017134,UN022363,UN023696,UN040770,UN040849,UN041240	K12881 UN040849,UN017134,UN023696	K12881 UN041240
K12812 UN035736,UN036476,UN051594	K12812	K12812
K13171 UN016416,UN054053	K13171	K13171 UN016416,UN054053
K14285	K14285	K14285
K14326 UN026732,UN043541	K14326	K14326 UN043541
K14327 UN000087	K14327	K14327 UN000087
K14328 UN042698	K14328	K14328 UN042698
M00405 THC complex [PATH:map03040 map03013] [BR:ko03041] (4) (1 block missing)		M00405 THC complex [PATH:map03040 map03013] [BR:ko03041] (2) (1 block missing)
K12878		K12878
K12879 UN030014,UN039311		K12879 UN030014,UN039311
K13174 UN023911		K13174
K13175		K13175
K13176 UN019715		K13176
M00406 TREX complex [PATH:map03013 map03040] [BR:ko03041] (14) (1 block missing)	M00406 TREX complex [PATH:map03013 map03040] [BR:ko03041] (3) (1 block missing)	M00406 TREX complex [PATH:map03013 map03040] [BR:ko03041] (3) (1 block missing)
K12878	K12878	K12878
K12879 UN030014,UN039311	K12879	K12879 UN030014,UN039311
K13174 UN023911	K13174	K13174
K13175	K13175	K13175
K13176 UN019715	K13176	K13176
K12880 UN033045	K12880	K12880
K12881 UN017134,UN022363,UN023696,UN040770,UN040849,UN041240	K12881 UN040849,UN017134,UN023696	K12881 UN041240
K12812 UN035736,UN036476,UN051594	K12812	K12812
M00391 Exosome, eukaryotes [PATH:map03018] (19) (complete)	M00391 Exosome, eukaryotes [PATH:map03018] (2) (1 block missing)	M00391 Exosome, eukaryotes [PATH:map03018] (4) (1 block missing)
K07573 UN018784	K07573	K07573
K12587 UN029997	K12587	K12587
K03679 UN033498	K03679	K03679
K03681 UN029618	K03681	K03681
K11600 UN018718,UN019757,UN051770	K11600 UN019757,UN018718	K11600
K12589 UN024813	K12589	K12589
K12586 UN017942	K12586	K12586
K12585 UN003770,UN005566,UN015229,UN024659,UN042718,UN043196	K12585	K12585 UN024659,UN005566,UN003770
K03678 UN043893,UN054048	K03678	K03678 UN054048
K12590 UN035485,UN051909	K12590	K12590
M00392 Ski complex [PATH:map03018] (4) (complete)		M00392 Ski complex [PATH:map03018] (1) (1 block missing)
K12599 UN000585,UN054085		K12599
K12600 UN040790		K12600 UN040790
K12601		K12601
K12602 UN020283		K12602
M00393 TRAMP complex [PATH:map03018] (7) (1 block missing)		M00393 TRAMP complex [PATH:map03018] (4) (1 block missing)
K03514 UN000025		K03514
K12596		K12596
K12597		K12597
K12598 UN028880,UN029175,UN032319,UN036815,UN042239,UN043501		K12598 UN036815,UN029175,UN032319,UN043501
M00394 RNA degradosome [PATH:map03018] (8) (1 block missing)		M00394 RNA degradosome [PATH:map03018] (3) (1 block missing)
K08300 UN041903		K08300 UN041903
K03732		K03732
K01689 UN025634,UN035558		K01689
K00962 UN001202,UN022236,UN024716,UN030665,UN034557		K00962 UN034557,UN030665
M00395 Decapping complex [PATH:map03018] (5) (1 block missing)		M00395 Decapping complex [PATH:map03018] (2) (1 block missing)
K12610		K12610
K12611 UN011375		K12611
K12612		K12612
K12613 UN035989		K12613
K12614 UN019809,UN021721,UN038236		K12614 UN019809,UN038236
K12615		K12615
K12617		K12617
Ribosome	Ribosome	Ribosome
M00178 Ribosome, bacteria [PATH:map03010] [BR:ko03011] (103) (1 block missing)	M00178 Ribosome, bacteria [PATH:map03010] [BR:ko03011] (48) (1 block missing)	M00178 Ribosome, bacteria [PATH:map03010] [BR:ko03011] (2) (1 block missing)
K02945 UN009864,UN039531	K02945	K02945
K02967 UN018773	K02967 UN018773	K02967
K02982 UN017759,UN035330,UN038735,UN038755	K02982 UN038735,UN035330	K02982
K02986 UN038987	K02986 UN038987	K02986
K02988 UN019567,UN032786	K02988 UN019567	K02988
K02990 UN023890,UN035371,UN054607	K02990	K02990
K02992	K02992	K02992
K02994 UN041876	K02994 UN041876	K02994
K02996 UN025840,UN037320,UN041837	K02996	K02996
K02946 UN034769	K02946 UN034769	K02946
K02948 UN024721,UN024783	K02948 UN024721,UN024783	K02948
K02950 UN026264,UN030686	K02950 UN026264,UN030686	K02950
K02952 UN017744,UN019792,UN021660	K02952 UN019792,UN021660	K02952
K02954	K02954	K02954
K02956 UN037212,UN037300	K02956 UN037212,UN037300	K02956
K02959 UN021270,UN039394	K02959 UN039394	K02959
K02961 UN036084,UN039659	K02961 UN039659	K02961
K02963	K02963	K02963
K02965 UN034935	K02965 UN034935	K02965
K02968 UN035329,UN035443	K02968 UN035329,UN035443	K02968
K02970	K02970	K02970
K02863 UN014363,UN030056,UN038219,UN038532	K02863 UN038219	K02863
K02886 UN036029	K02886	K02886
K02906 UN012278,UN024289,UN034078,UN042377	K02906 UN024289	K02906
K02926 UN025607,UN033219,UN034929	K02926 UN033219	K02926
K02931 UN019410	K02931	K02931
K02933 UN018416,UN019845	K02933 UN018416	K02933
K02935 UN027704,UN033768,UN037501	K02935 UN033768,UN037501	K02935
K02939 UN010366,UN038432	K02939 UN038432	K02939
K02864 UN018891	K02864 UN018891	K02864
K02867 UN013286,UN030069,UN034706	K02867	K02867
K02871 UN029353,UN033557,UN037769,UN038452	K02871 UN033557	K02871
K02874 UN027180,UN029621	K02874 UN027180	K02874
K02876 UN020159,UN030446,UN032976,UN051619	K02876 UN020159	K02876 UN051619
K02878 UN021253,UN036819	K02878	K02878
K02879 UN027322,UN033276,UN037569	K02879 UN027322,UN033276	K02879
K02881 UN022163,UN032747	K02881 UN032747	K02881
K02884 UN020401,UN038587	K02884 UN020401	K02884
K02887 UN036349,UN038841	K02887 UN038841	K02887
K02888 UN008991	K02888 UN008991	K02888
K02890 UN043020	K02890	K02890
K02892 UN024092,UN034233,UN037206	K02892 UN037206	K02892 UN024092
K02895 UN009983,UN017684,UN039543	K02895 UN039543	K02895
K02897 UN036867,UN038247	K02897	K02897
K02899 UN033023,UN038608,UN039593	K02899 UN039593,UN038608	K02899
K02902 UN010077,UN033766,UN037763	K02902 UN033766	K02902
K02904 UN026137,UN029732,UN052537	K02904 UN026137,UN052537	K02904
K02907	K02907	K02907
K02909 UN033076,UN039207	K02909 UN033076,UN039207	K02909
K02911	K02911	K02911
K02913 UN023857	K02913 UN023857	K02913
K02914	K02914	K02914
K02916 UN039667	K02916 UN039667	K02916
K02919 UN029441	K02919	K02919
K07590	K07590	K07590
M00177 Ribosome, eukaryotes [PATH:map03010] [BR:ko03011] (139) (complete)	M00177 Ribosome, eukaryotes [PATH:map03010] [BR:ko03011] (128) (complete)	M00177 Ribosome, eukaryotes [PATH:map03010] [BR:ko03011] (2) (1 block missing)
K02981 UN020141,UN036233	K02981 UN020141,UN036233	K02981
K02985 UN020493,UN020780	K02985 UN020780,UN020493	K02985
K02984 UN033808	K02984 UN033808	K02984
K02987 UN021800	K02987 UN021800	K02987
K02989 UN033618,UN034229	K02989 UN034229,UN033618	K02989
K02991 UN037834	K02991 UN037834	K02991
K02993 UN009890	K02993 UN009890	K02993
K02995 UN034918,UN039086	K02995 UN034918,UN039086	K02995
K02997 UN019270,UN034923	K02997 UN034923,UN019270	K02997
K02947 UN009050,UN027758	K02947 UN009050,UN027758	K02947
K02949 UN019614,UN020989	K02949 UN020989,UN019614	K02949
K02951 UN021620,UN022092,UN024840	K02951 UN024840,UN022092,UN021620	K02951
K02953 UN019985,UN022180,UN024071	K02953 UN022180,UN019985,UN024071	K02953
K02955 UN020753	K02955 UN020753	K02955
K02958 UN031750,UN031907	K02958 UN031750,UN031907	K02958
K02957 UN036550	K02957 UN036550	K02957
K02960 UN039672	K02960 UN039672	K02960
K02962 UN025441,UN033192	K02962 UN025441,UN033192	K02962
K02964 UN033168,UN035544	K02964 UN033168,UN035544	K02964
K02966 UN019891,UN034544	K02966 UN034544,UN019891	K02966
K02969 UN015378,UN032784,UN038270	K02969 UN038270,UN032784,UN015378	K02969
K02971 UN037783	K02971 UN037783	K02971
K02973 UN038610	K02973 UN038610	K02973
K02974 UN021709,UN024737,UN026217	K02974 UN021709,UN024737,UN026217	K02974
K02975 UN026242,UN034972	K02975 UN034972,UN026242	K02975
K02976 UN029295	K02976 UN029295	K02976
K02978 UN037776	K02978 UN037776	K02978
K02977 UN038619	K02977 UN038619	K02977
K02979 UN020336	K02979 UN020336	K02979
K02980 UN026065,UN038574	K02980 UN038574,UN026065	K02980
K02983 UN020369,UN029274,UN036916	K02983 UN020369,UN036916,UN029274	K02983
K02998 UN000225	K02998 UN000225	K02998
K02925 UN024802,UN029448,UN037177	K02925 UN029448,UN037177,UN024802	K02925
K02930 UN039252	K02930 UN039252	K02930
K02932 UN016042,UN035009	K02932 UN035009,UN016042	K02932
K02934 UN033078,UN038418	K02934 UN038418,UN033078	K02934
K02937 UN020794,UN022189,UN023844,UN030778,UN032565,UN038390,UN052645	K02937 UN023844,UN020794,UN032565	K02937 UN038390
K02936 UN018711,UN036976	K02936 UN036976,UN018711	K02936
K02938 UN019864,UN036492	K02938 UN019864,UN036492	K02938
K02940 UN021401,UN036497	K02940 UN021401,UN036497	K02940
K02866 UN030054,UN030626,UN034401	K02866 UN030626,UN034401,UN030054	K02866
K02865 UN035297	K02865 UN035297	K02865
K02868 UN028159,UN028492	K02868 UN028492,UN028159	K02868
K02870 UN020162	K02870 UN020162	K02870
K02873 UN018707,UN037934	K02873 UN037934,UN018707	K02873
K02872 UN039380	K02872 UN039380	K02872
K02875 UN027351	K02875 UN027351	K02875
K02877 UN000018	K02877 UN000018	K02877
K02880 UN018289,UN020896,UN033384	K02880 UN020896,UN033384,UN018289	K02880
K02883 UN034107,UN038732	K02883 UN038732	K02883
K02882 UN030691,UN032778	K02882 UN032778	K02882
K02885 UN000145,UN029114	K02885 UN000145,UN029114	K02885
K02889 UN026337	K02889 UN026337	K02889
K02891 UN024901,UN027558	K02891 UN024901,UN027558	K02891
K02894 UN019574	K02894 UN019574	K02894
K02893 UN023577,UN024128	K02893 UN023577,UN024128	K02893
K02896 UN023131,UN029428,UN039237	K02896 UN029428,UN023131,UN039237	K02896
K02898 UN039182	K02898 UN039182	K02898
K02901 UN029419,UN038694	K02901 UN038694,UN029419	K02901
K02900 UN027827	K02900 UN027827	K02900
K02903 UN025491	K02903 UN025491	K02903
K02905 UN000761	K02905 UN000761	K02905
K02908 UN013220,UN019181	K02908 UN013220,UN019181	K02908
K02910 UN038488	K02910 UN038488	K02910
K02912 UN038592	K02912 UN038592	K02912
K02915 UN037531	K02915 UN037531	K02915
K02918 UN021907,UN022120	K02918 UN022120,UN021907	K02918
K02917 UN021706,UN033173	K02917 UN033173,UN021706	K02917
K02920 UN027111	K02920 UN027111	K02920
K02922 UN021941	K02922 UN021941	K02922
K02921 UN020457,UN028258	K02921 UN020457,UN028258	K02921
K02923 UN016952,UN022564,UN033684	K02923 UN022564,UN016952,UN033684	K02923
K02924 UN040702	K02924 UN040702	K02924
K02927 UN018281,UN022382,UN033756,UN033848,UN038688	K02927 UN033756	K02927 UN033848
K02928	K02928	K02928
K02929 UN035638	K02929 UN035638	K02929
K02941 UN033281,UN033742,UN038607	K02941 UN038607,UN033742	K02941
K02942	K02942	K02942
K02943 UN034394	K02943 UN034394	K02943
Proteasome	Proteasome	Proteasome
M00340 Proteasome, 20S core particle [PATH:map03050] [BR:ko03051] (19) (complete)	M00340 Proteasome, 20S core particle [PATH:map03050] [BR:ko03051] (9) (1 block missing)
K02725 UN038056	K02725 UN038056
K02726 UN035613,UN039626	K02726 UN039626
K02727 UN026709	K02727 UN026709
K02728 UN008559,UN036896	K02728 UN008559
K02729 UN037168	K02729 UN037168
K02730 UN006220,UN037854	K02730
K02731 UN038082	K02731
K02732 UN020971	K02732
K02734 UN034324	K02734 UN034324
K02735 UN035741	K02735
K02736 UN035411	K02736 UN035411
K02737 UN022555	K02737 UN022555
K02738 UN019416,UN037946	K02738 UN037946
K02739 UN036426,UN038267	K02739
M00341 Proteasome, 19S regulatory particle (PA700) [PATH:map03050] [BR:ko03051] (31) (complete)	M00341 Proteasome, 19S regulatory particle (PA700) [PATH:map03050] [BR:ko03051] (1) (1 block missing)	M00341 Proteasome, 19S regulatory particle (PA700) [PATH:map03050] [BR:ko03051] (2) (1 block missing)
K03061 UN036820	K03061	K03061
K03062 UN020391	K03062	K03062
K03063 UN039031	K03063	K03063
K03064 UN000657,UN041007	K03064	K03064
K03065 UN026802,UN027488,UN028703	K03065	K03065
K03066 UN039230	K03066	K03066
K03028 UN016658,UN029218,UN044551	K03028	K03028 UN016658
K03032 UN027521,UN036193,UN042760	K03032	K03032 UN027521
K03033 UN037668	K03033	K03033
K03035 UN021114,UN037694	K03035	K03035
K03036 UN029859	K03036	K03036
K03037 UN036354	K03037	K03037
K03038 UN029048,UN032564	K03038	K03038
K03039 UN030152,UN031871	K03039 UN030152	K03039
K03029 UN006764,UN017316,UN038617	K03029	K03029
K03030 UN029352	K03030	K03030
K03031 UN033215,UN035652,UN036574	K03031	K03031
K06691	K06691	K06691
K10881	K10881	K10881
M00337 Immunoproteasome [PATH:map03050] [BR:ko03051] (14) (1 block missing)	M00337 Immunoproteasome [PATH:map03050] [BR:ko03051] (7) (1 block missing)
K02725 UN038056	K02725 UN038056
K02726 UN035613,UN039626	K02726 UN039626
K02727 UN026709	K02727 UN026709
K02728 UN008559,UN036896	K02728 UN008559
K02729 UN037168	K02729 UN037168
K02730 UN006220,UN037854	K02730
K02731 UN038082	K02731
K02732 UN020971	K02732
K02734 UN034324	K02734 UN034324
K02735 UN035741	K02735
K02736 UN035411	K02736 UN035411
K02741	K02741
K02733	K02733
K02740	K02740
K06696	K06696
K06697	K06697
Ubiquitin system	Ubiquitin system	Ubiquitin system
M00379 SCF-MET30 complex [PATH:map04120 map04111] [BR:ko04121] (5) (1 block missing)	M00379 SCF-MET30 complex [PATH:map04120 map04111] [BR:ko04121] (3) (1 block missing)
K03868 UN039257	K03868 UN039257
K03347 UN020107,UN050458	K03347
K03094 UN008904,UN053977	K03094 UN008904,UN053977
K10259	K10259
M00380 SCF-BTRC complex [PATH:map04120 map04114 map04310 map04710] [BR:ko04121] (5) (1 block missing)	M00380 SCF-BTRC complex [PATH:map04120 map04114 map04310 map04710] [BR:ko04121] (3) (1 block missing)
K03868 UN039257	K03868 UN039257
K03347 UN020107,UN050458	K03347
K03094 UN008904,UN053977	K03094 UN008904,UN053977
K03362	K03362
M00381 SCF-SKP2 complex [PATH:map04120 map04110 map05168] [BR:ko04121] (6) (complete)	M00381 SCF-SKP2 complex [PATH:map04120 map04110 map05168] [BR:ko04121] (4) (1 block missing)
K03868 UN039257	K03868 UN039257
K03347 UN020107,UN050458	K03347
K03094 UN008904,UN053977	K03094 UN008904,UN053977
K03875 UN036983	K03875 UN036983
M00382 SCF-FBS complex [PATH:map04120 map04141] [BR:ko04121] (6) (complete)	M00382 SCF-FBS complex [PATH:map04120 map04141] [BR:ko04121] (3) (1 block missing)
K03868 UN039257	K03868 UN039257
K03347 UN020107,UN050458	K03347
K03094 UN008904,UN053977	K03094 UN008904,UN053977
K10099 UN026839	K10099
K10100	K10100
M00407 SCF-CDC4 complex [PATH:map04120 map04111] [BR:ko04121] (5) (1 block missing)	M00407 SCF-CDC4 complex [PATH:map04120 map04111] [BR:ko04121] (3) (1 block missing)
K03868 UN039257	K03868 UN039257
K03347 UN020107,UN050458	K03347
K03094 UN008904,UN053977	K03094 UN008904,UN053977
K03361	K03361
M00411 SCF-GRR1 complex [PATH:map04120 map04111] [BR:ko04121] (5) (1 block missing)	M00411 SCF-GRR1 complex [PATH:map04120 map04111] [BR:ko04121] (3) (1 block missing)
K03868 UN039257	K03868 UN039257
K03347 UN020107,UN050458	K03347
K03094 UN008904,UN053977	K03094 UN008904,UN053977
K03360	K03360
M00383 ECV complex [PATH:map04120 map05211] [BR:ko04121] (5) (1 block missing)	M00383 ECV complex [PATH:map04120 map05211] [BR:ko04121] (2) (1 block missing)
K03868 UN039257	K03868 UN039257
K03870	K03870
K03872 UN018200,UN018339,UN030949,UN035447	K03872 UN030949
K03873	K03873
K03871	K03871
M00384 Cul3-SPOP complex [PATH:map04120] [BR:ko04121] (3) (complete)	M00384 Cul3-SPOP complex [PATH:map04120] [BR:ko04121] (1) (1 block missing)
K03868 UN039257	K03868 UN039257
[truncated: 259 more rows]
